# Supplementary material for: Conserved Noncoding Elements Follow Power-Law-Like Distributions in Several Genomes as a Result of Genome Dynamics
Source: PubMed Central journal article supplement (PMC4008492; doi:10.1371/journal.pone.0095437), 2014-05-02

**EU100+ CNEs on 10kb masked hg18: chr1**

$E = 2.3, \mu = 0.40$

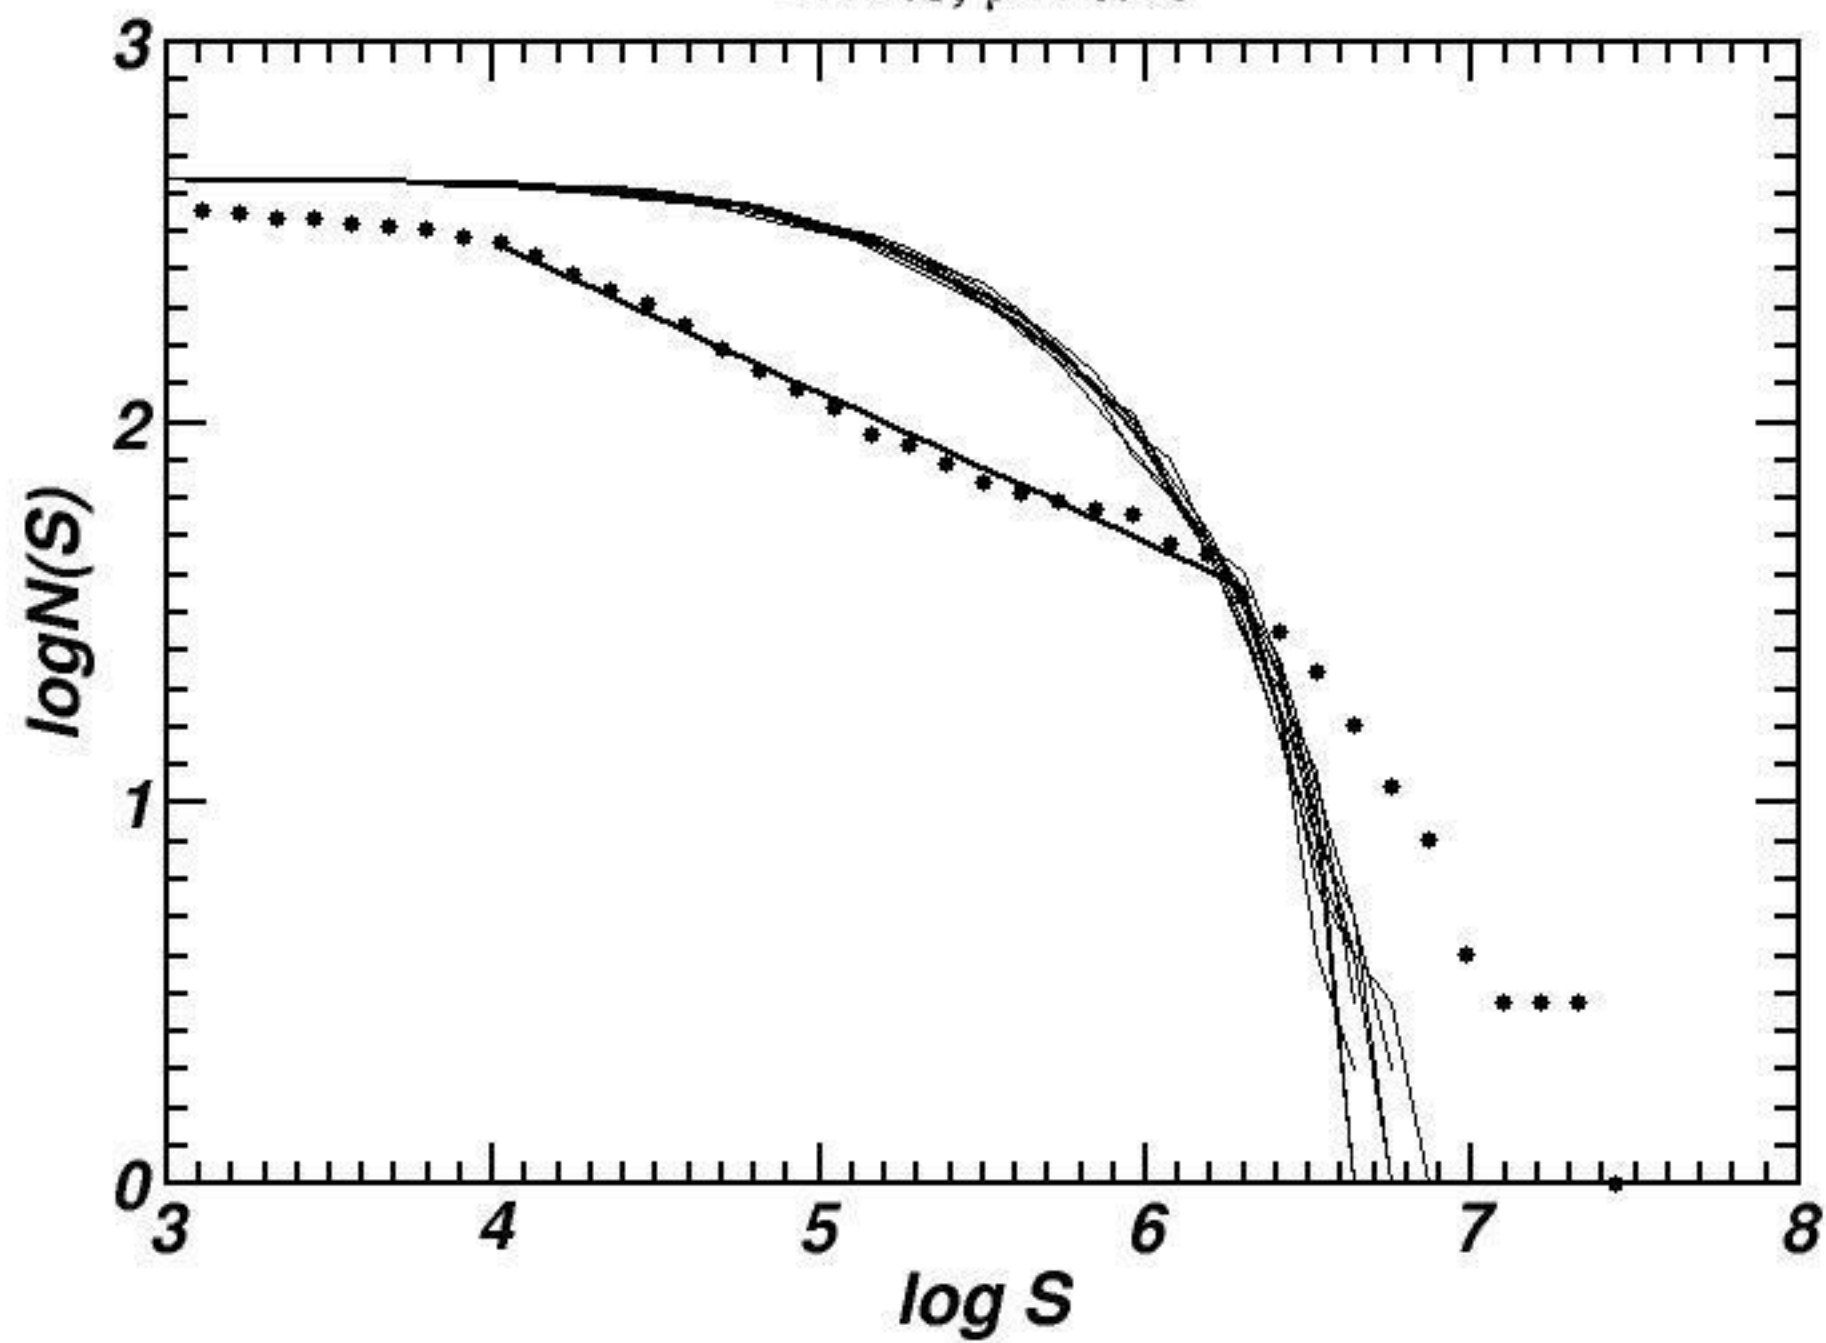

**EU100+ CNEs on 10kb masked hg18: chr2**

$E = 2.4, \mu = 0.50$

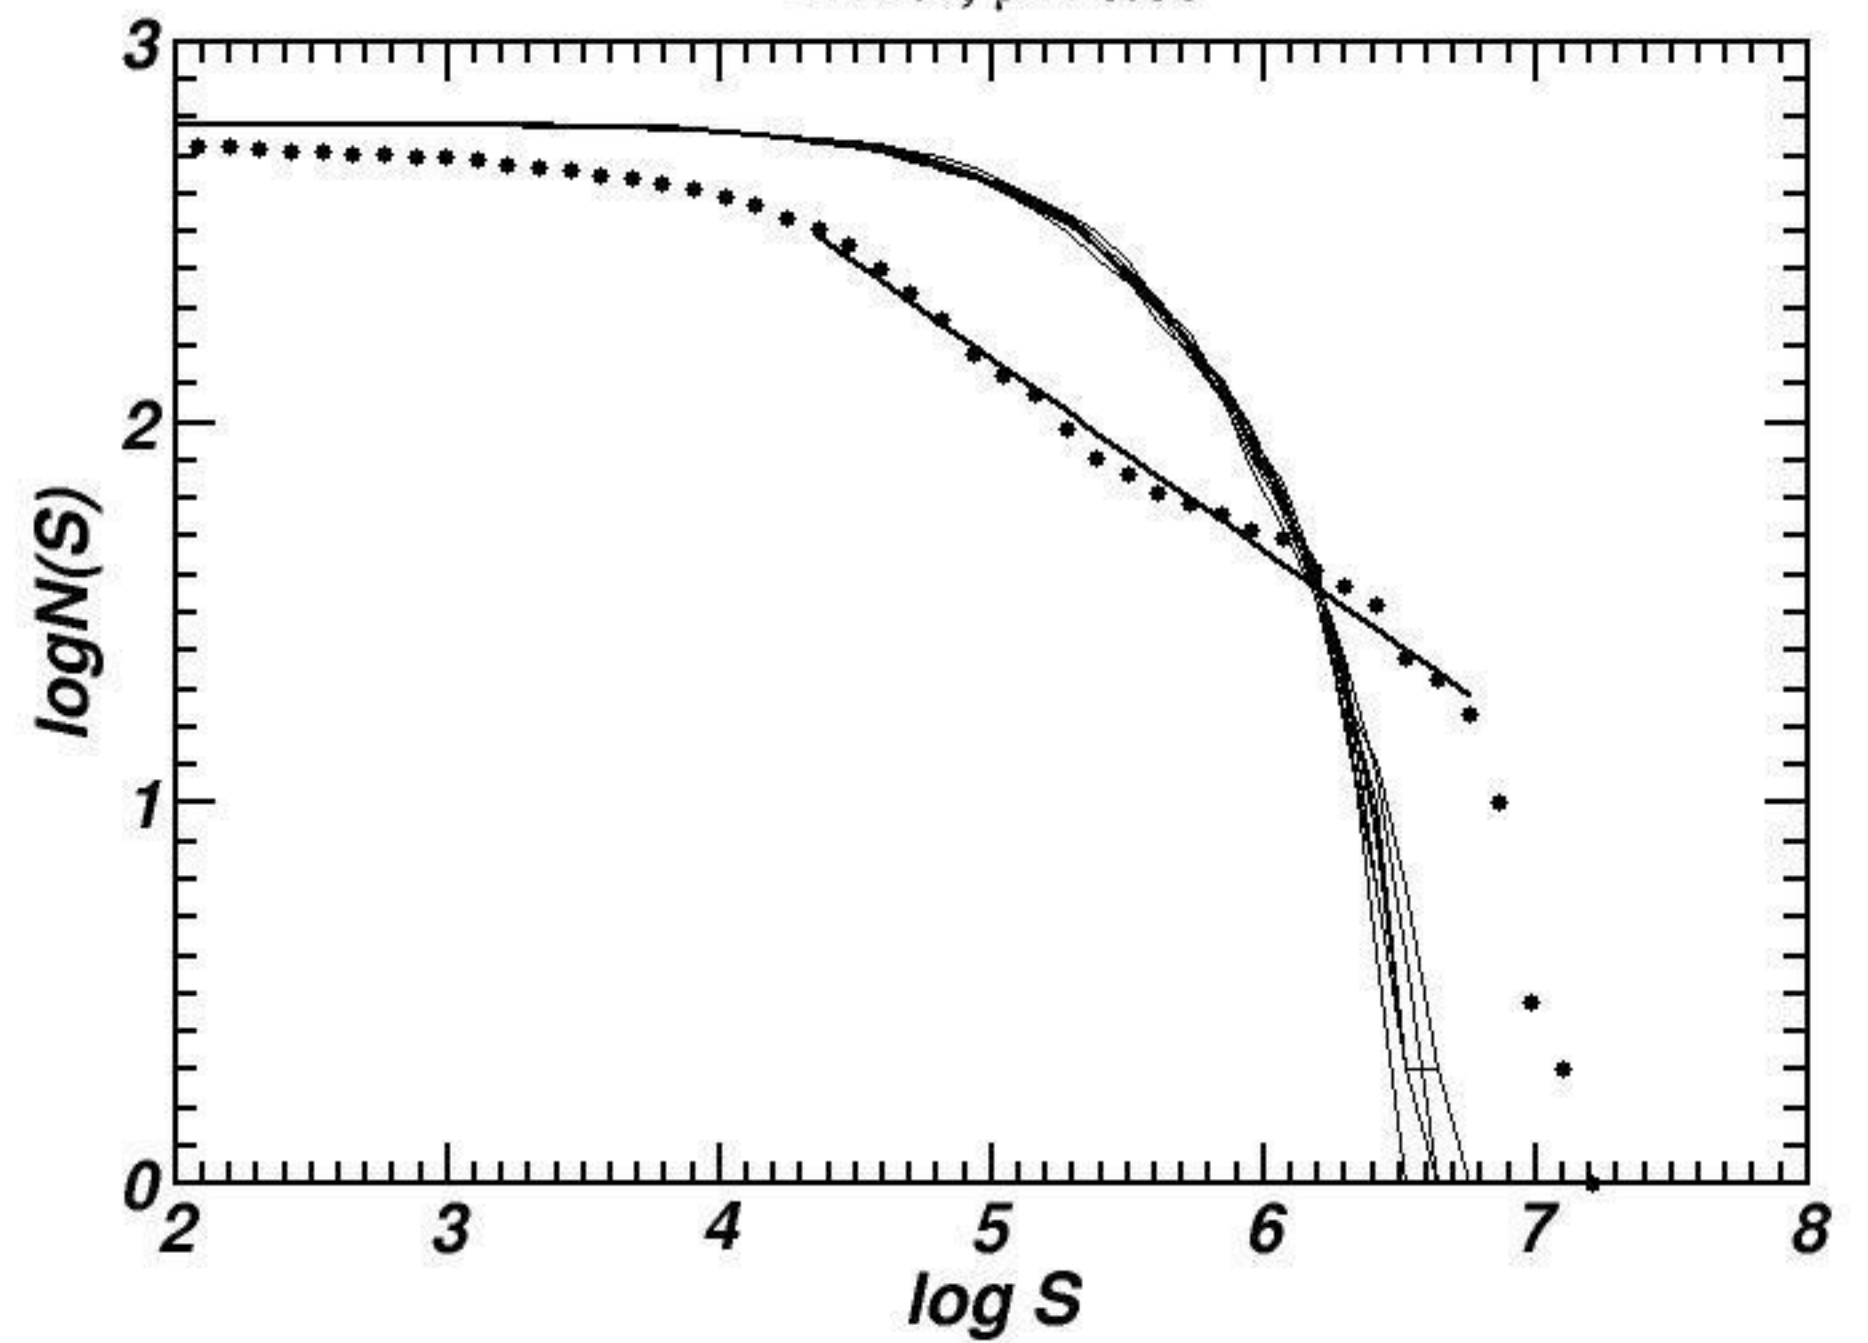

**EU100+ CNEs on 10kb masked hg18: chr3**

$E = 2.65, \mu = 0.40$

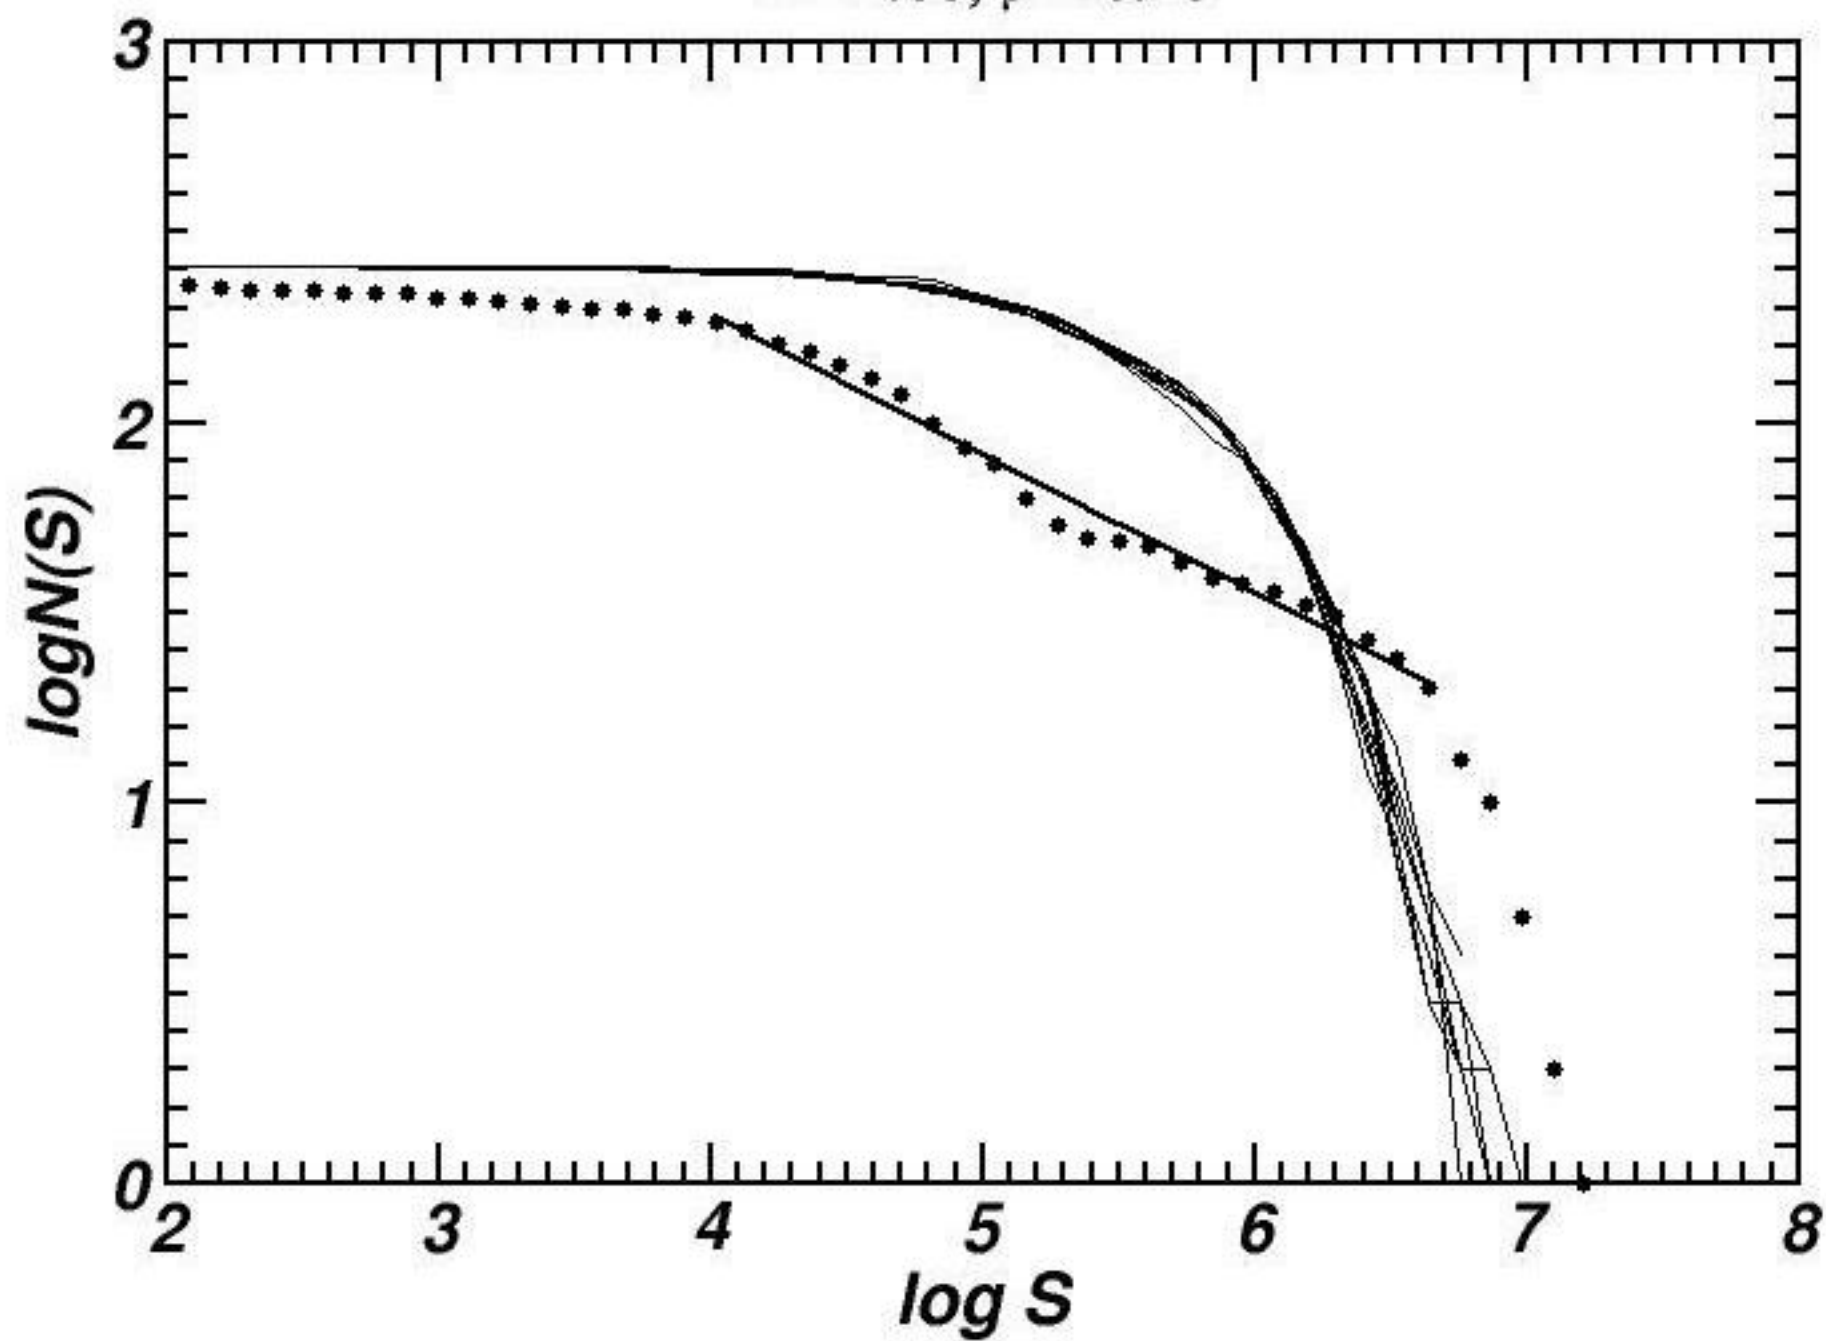

**EU100+ CNEs on 10kb masked hg18: chr4**

$E = 2.1, \mu = 0.30$

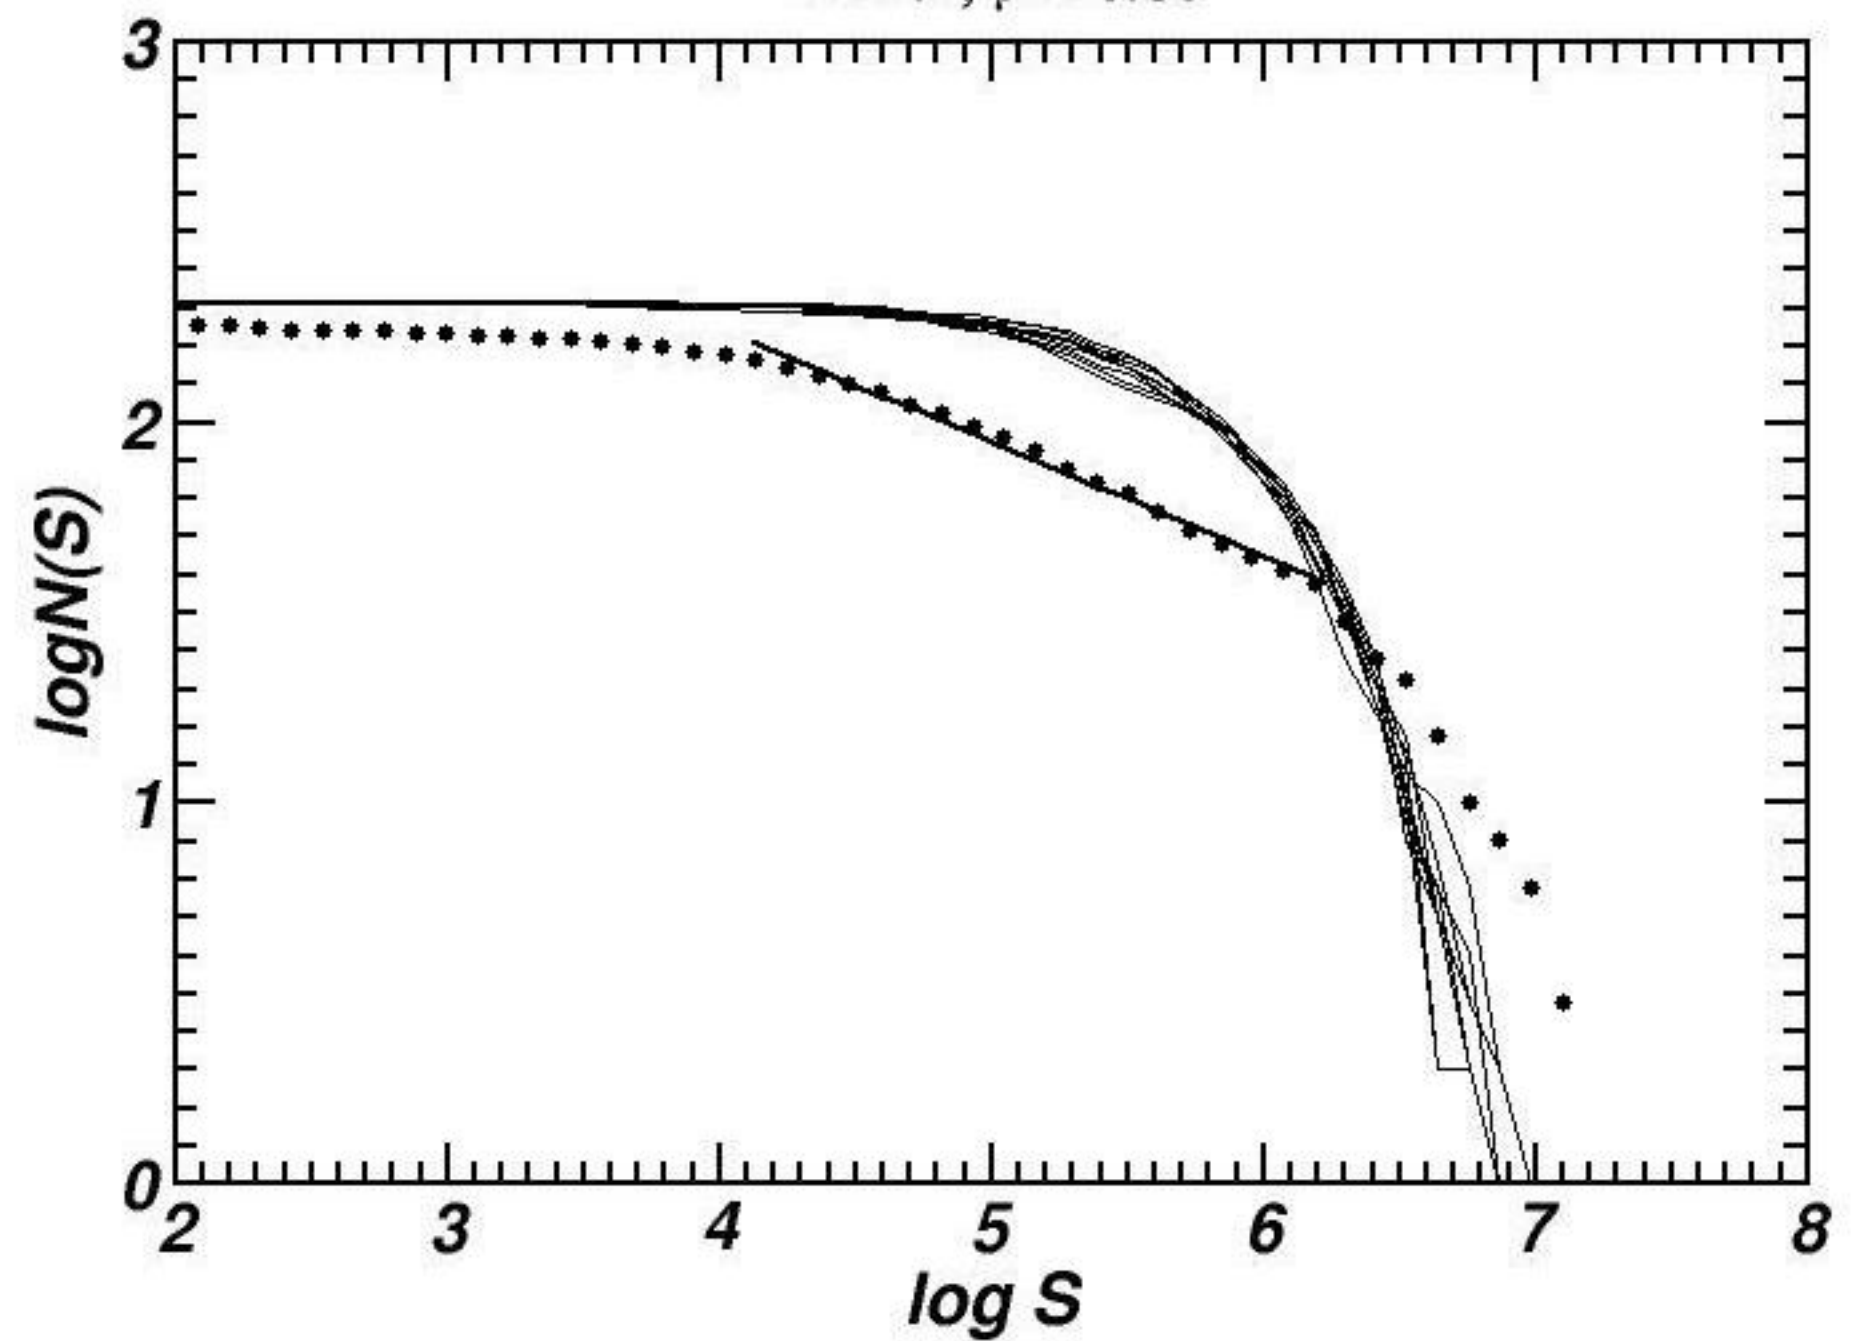

**EU100+ CNEs on 10kb masked hg18: chr5**

$E = 2.3, \mu = 0.50$

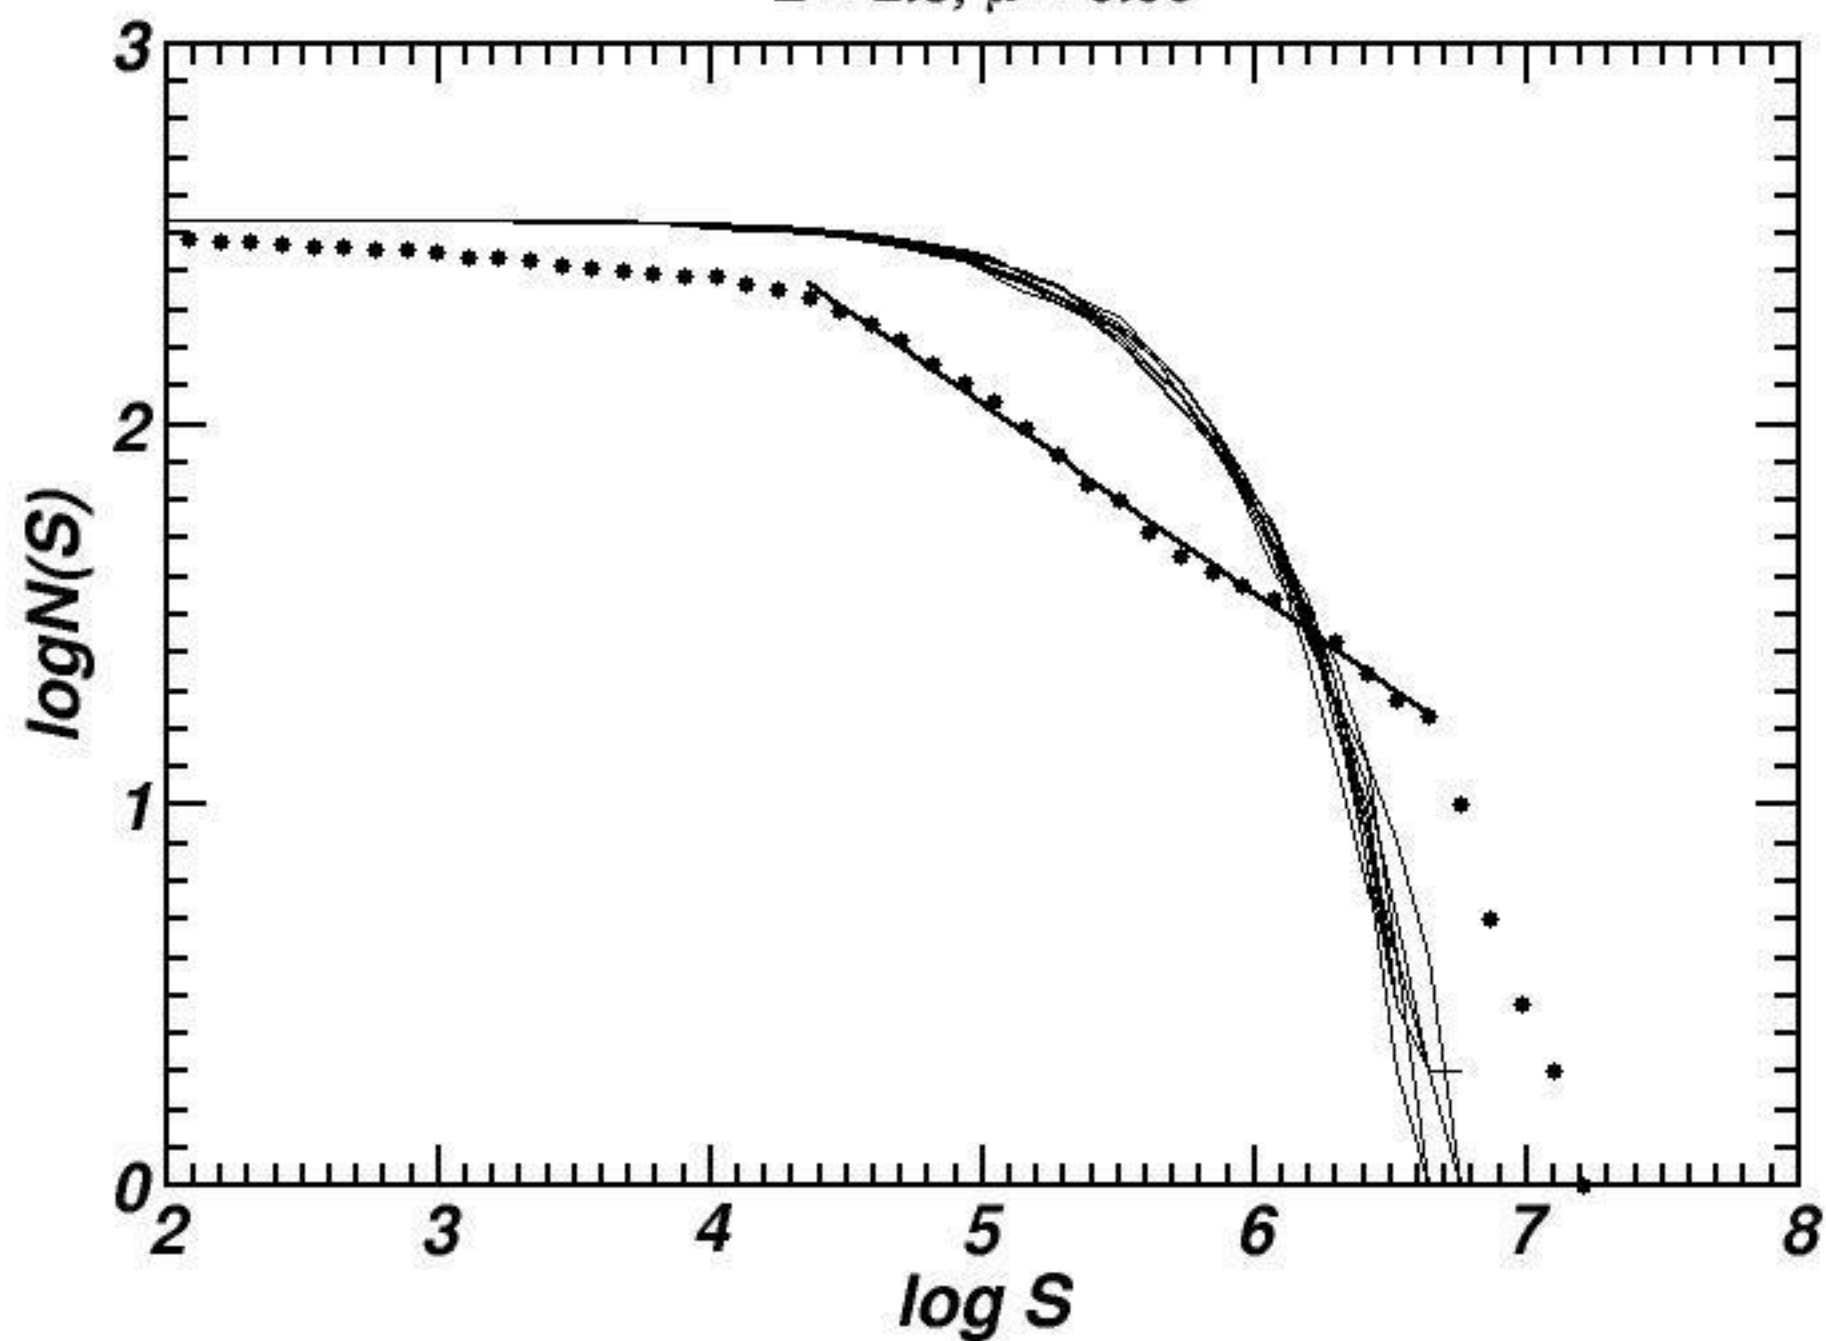

**EU100+ CNEs on 10kb masked hg18: chr10**

$E = 2.6, \mu = 0.40$

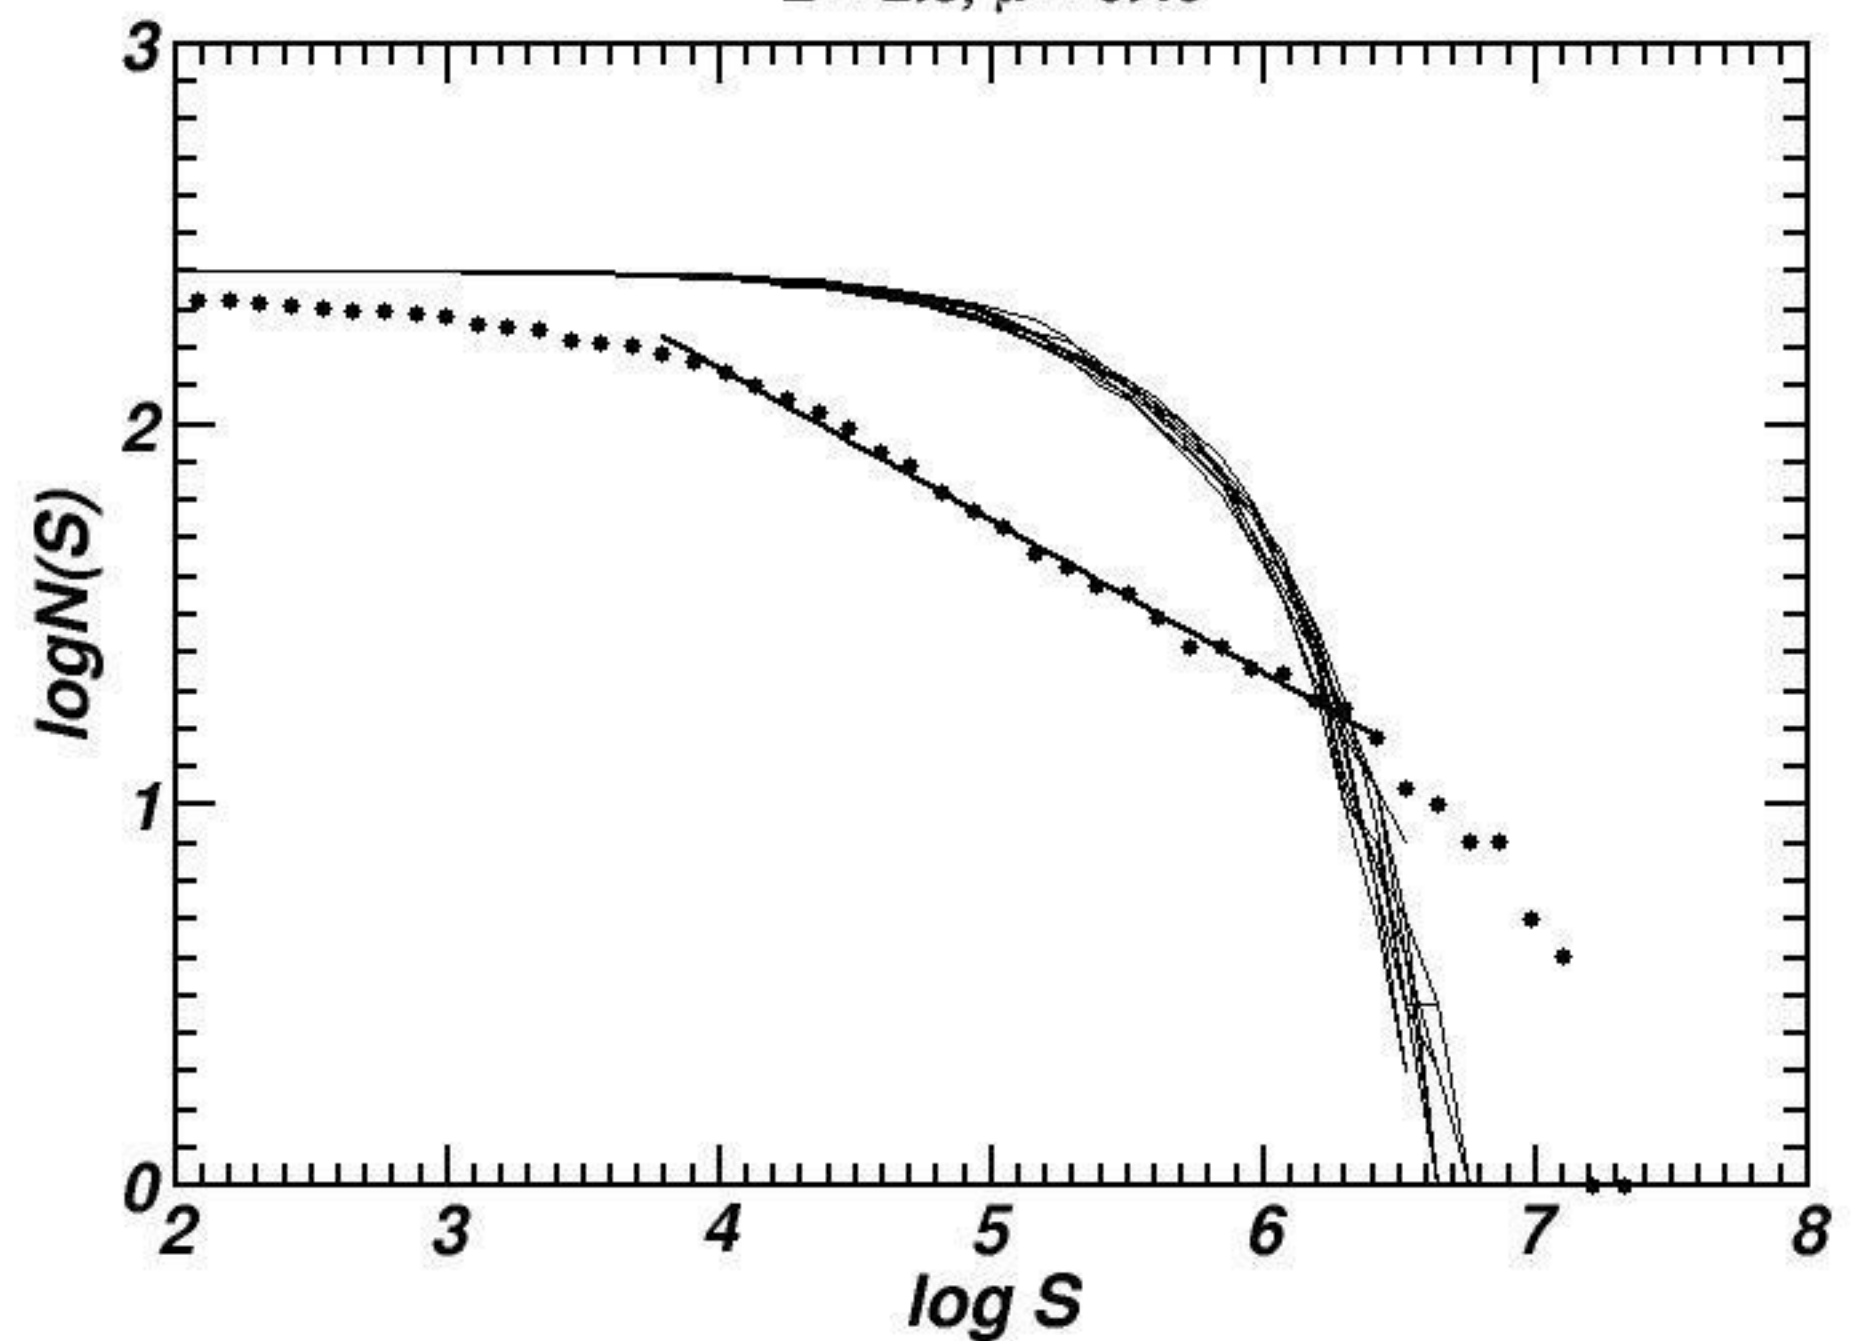

**EU100+ CNEs on 100kb masked hg18: chr1**

$E = 2.77, \mu = 0.33$

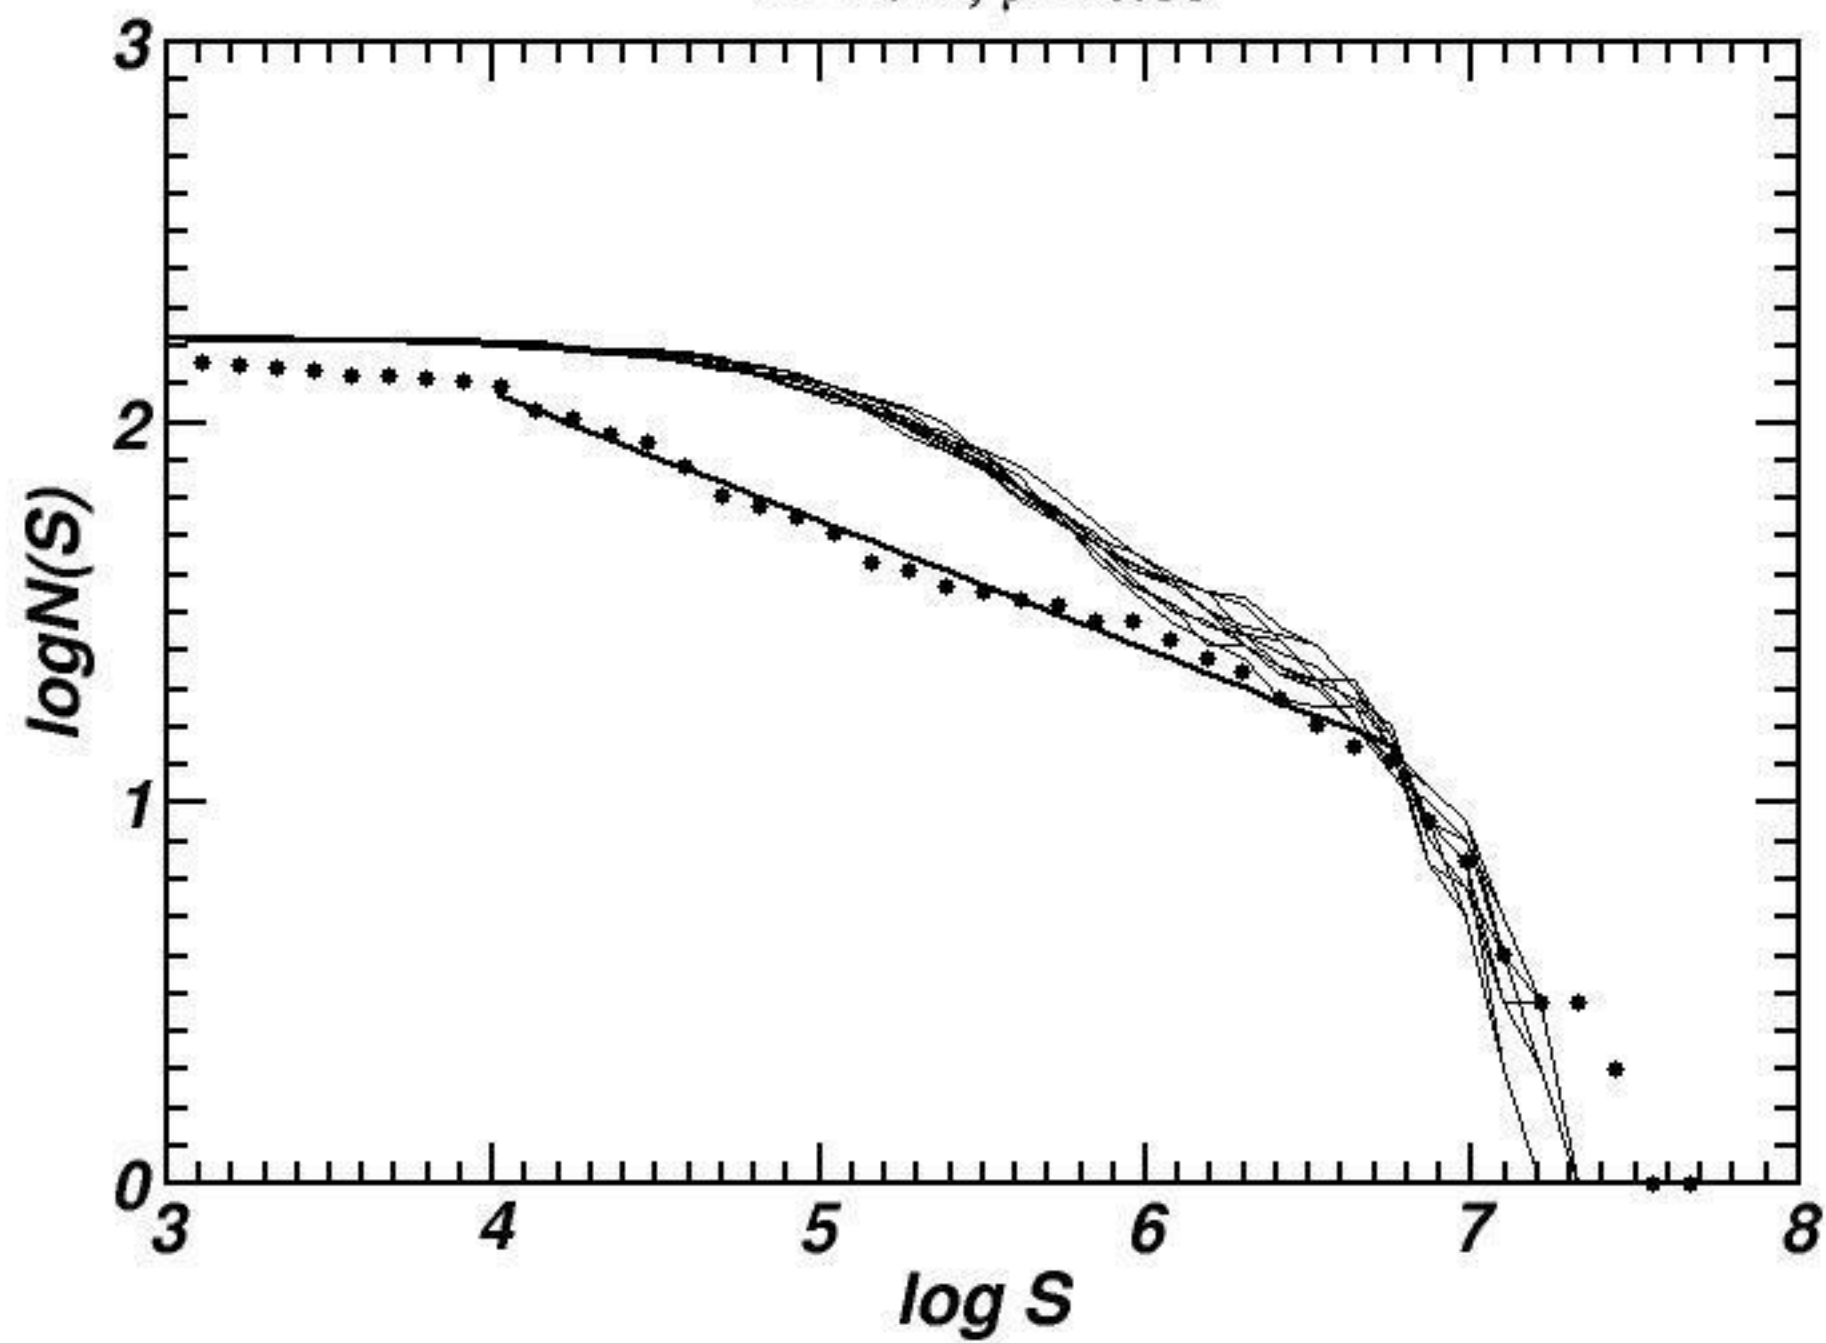

**EU100+ CNEs on 100kb masked hg18: chr2**

$E = 1.85, \mu = 0.56$

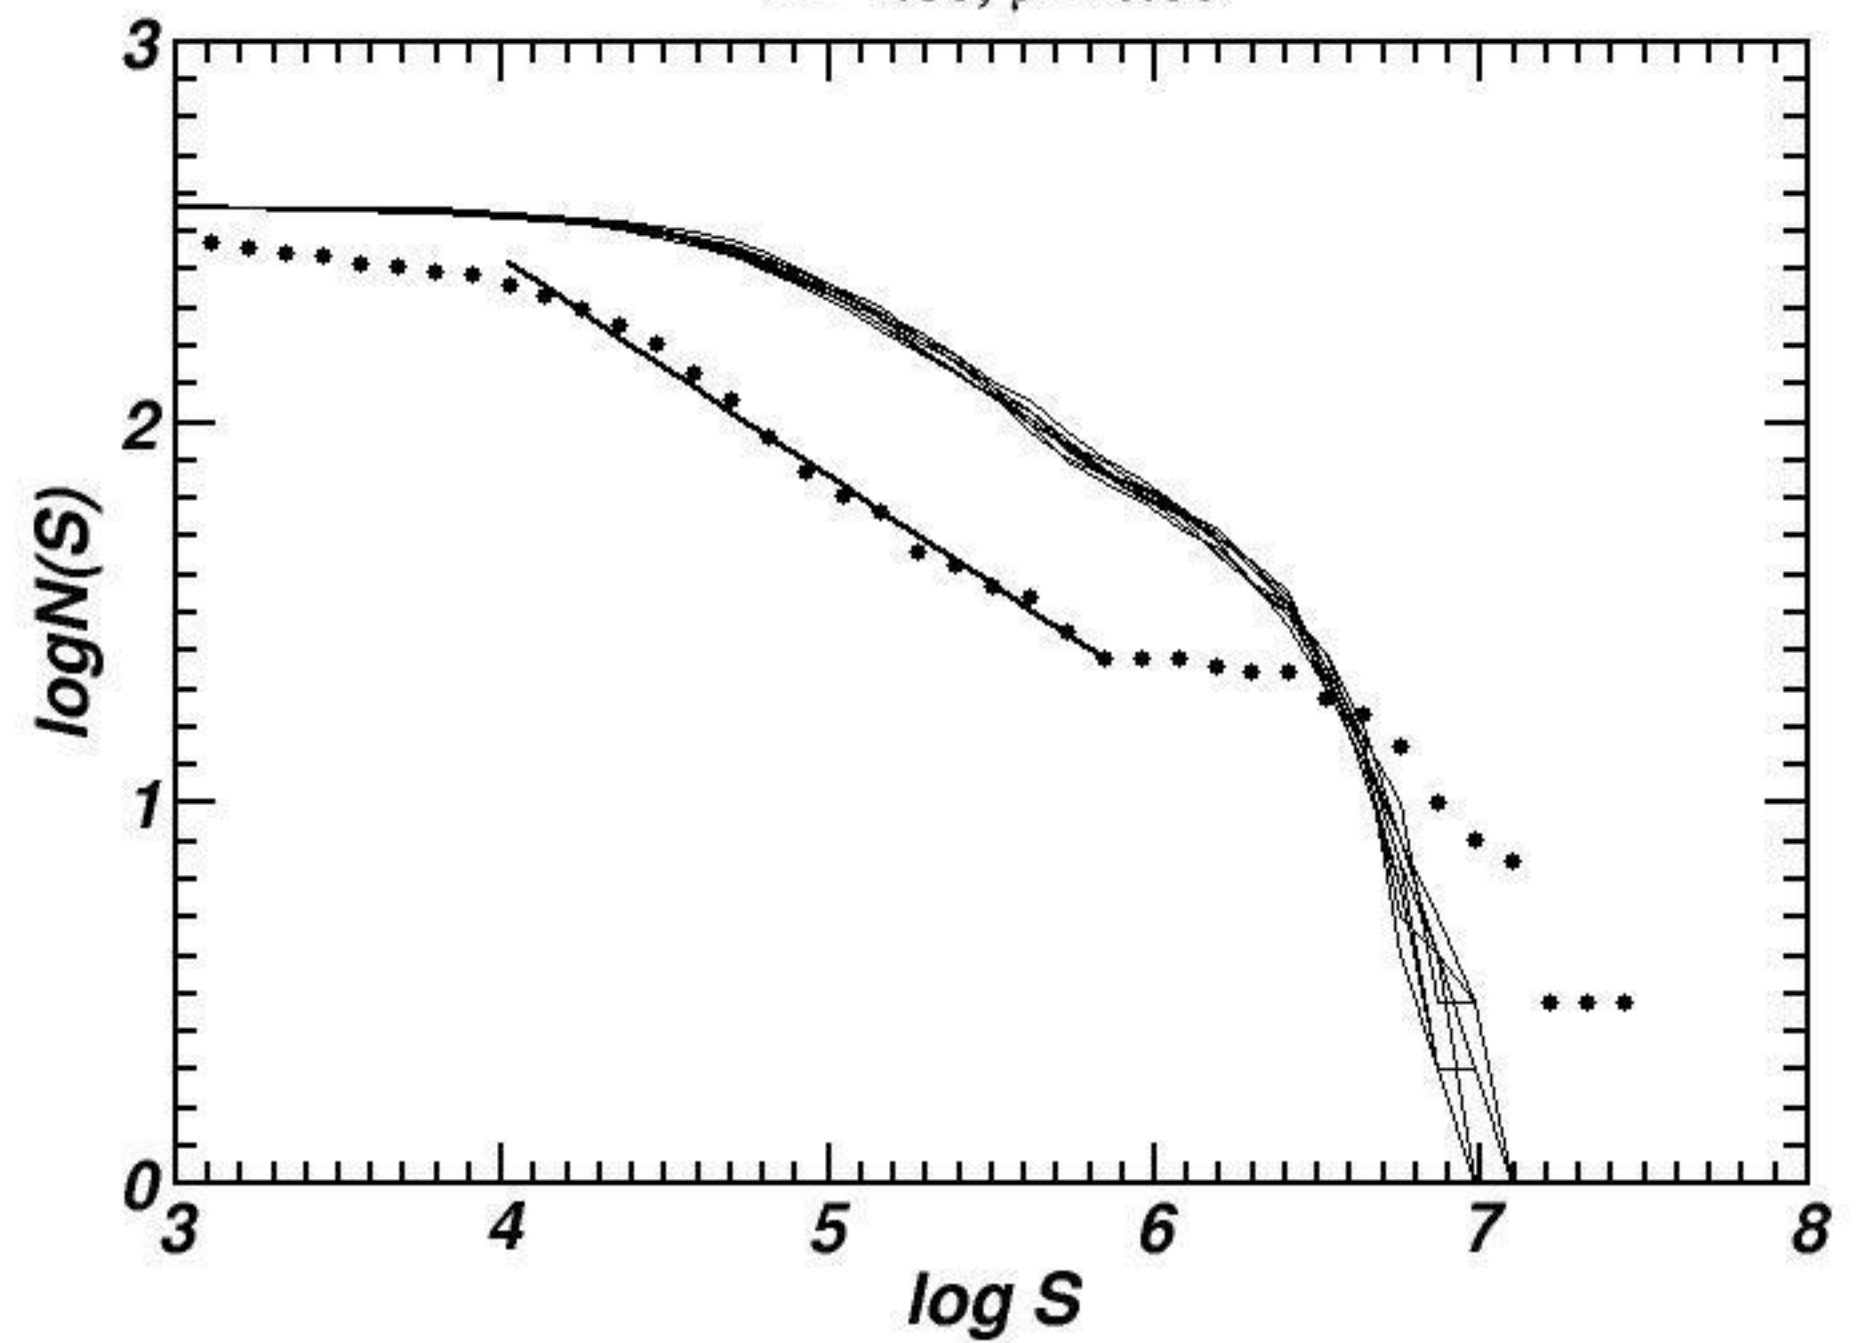

**EU100+ CNEs on 100kb masked hg18: chr3**

$E = 2.6, \mu = 0.36$

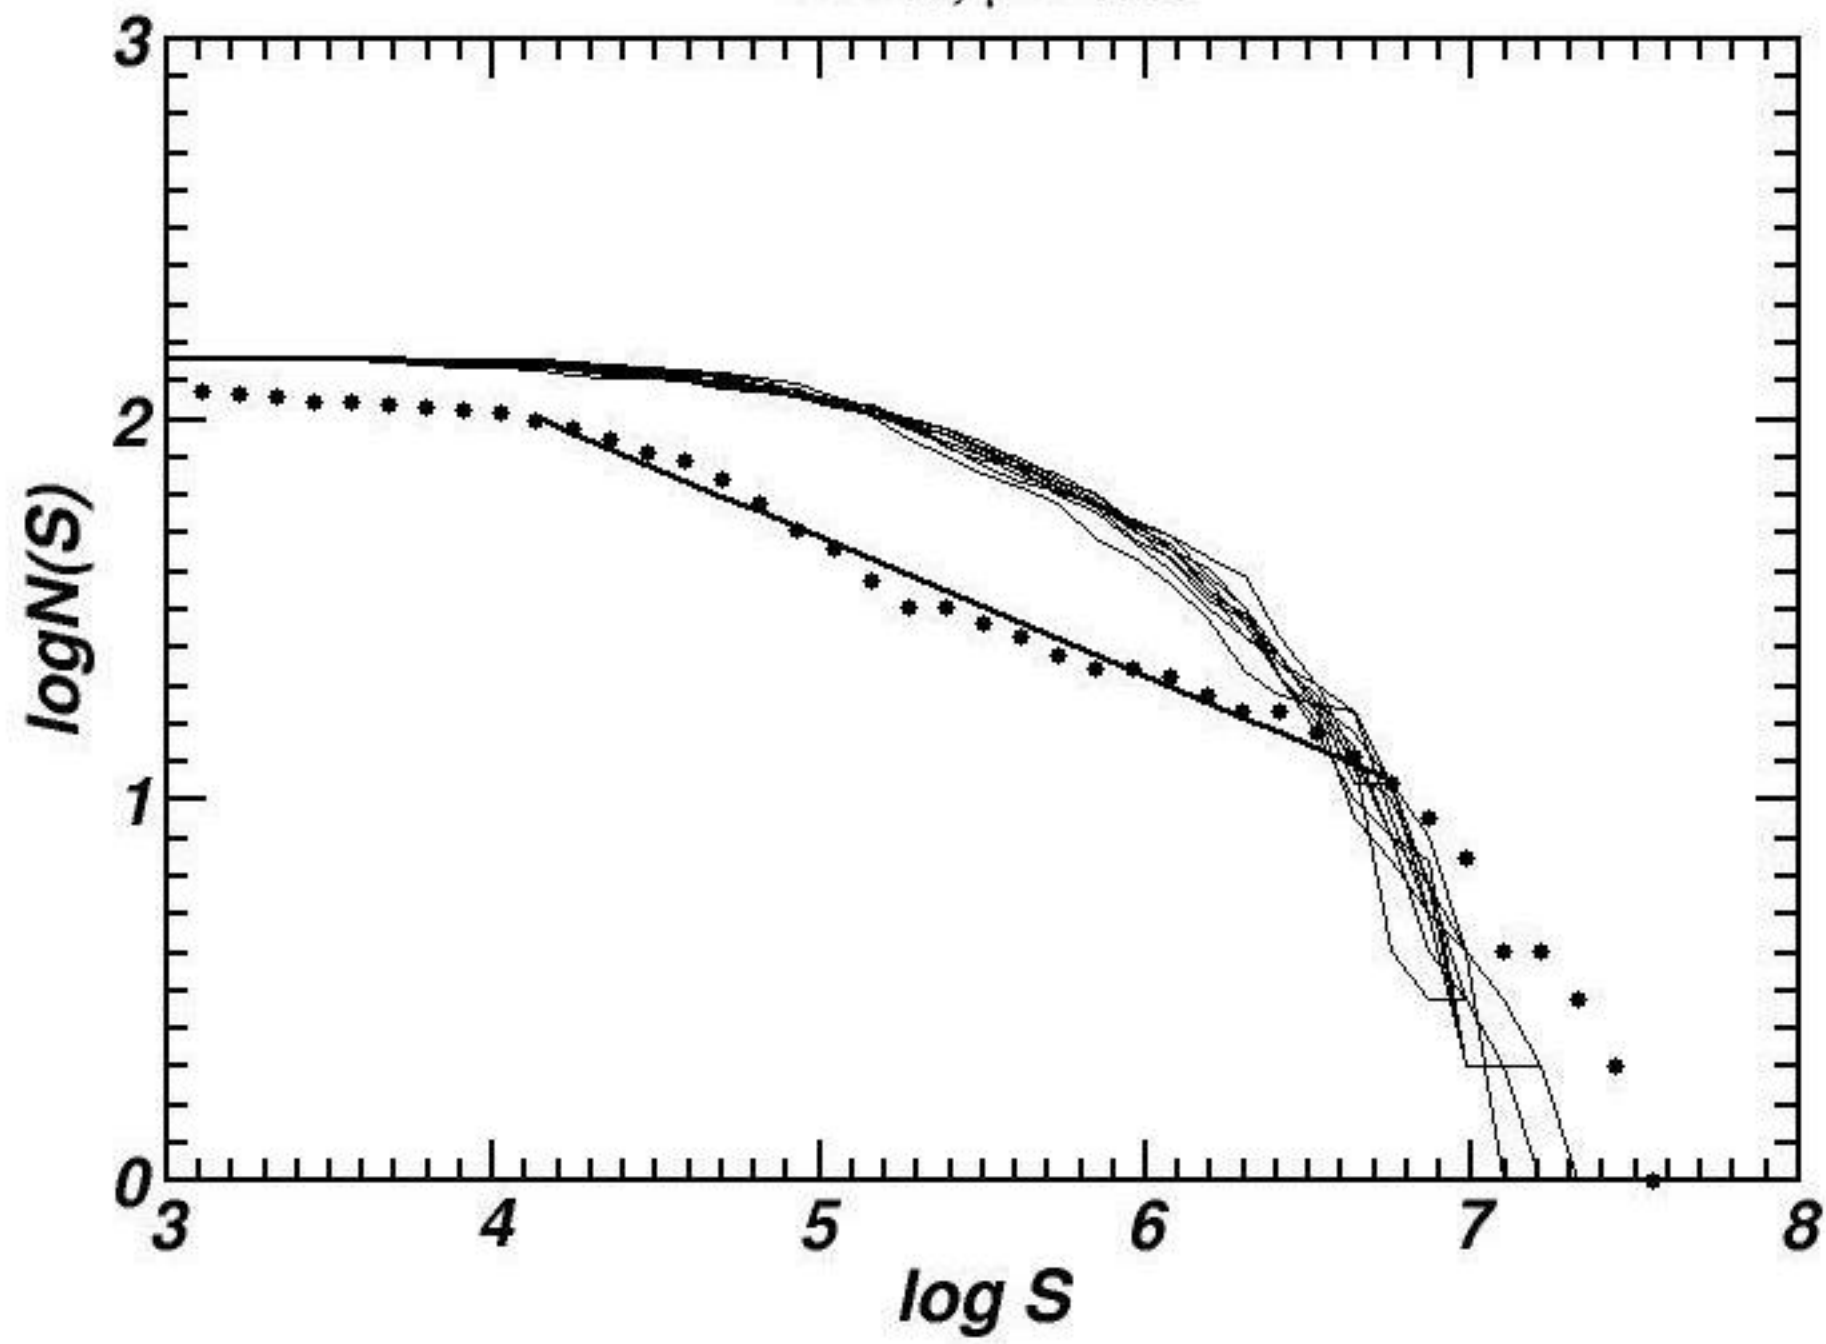

**EU100+ CNEs on 100kb masked hg18: chr4**

$E = 2.4, \mu = 0.20$

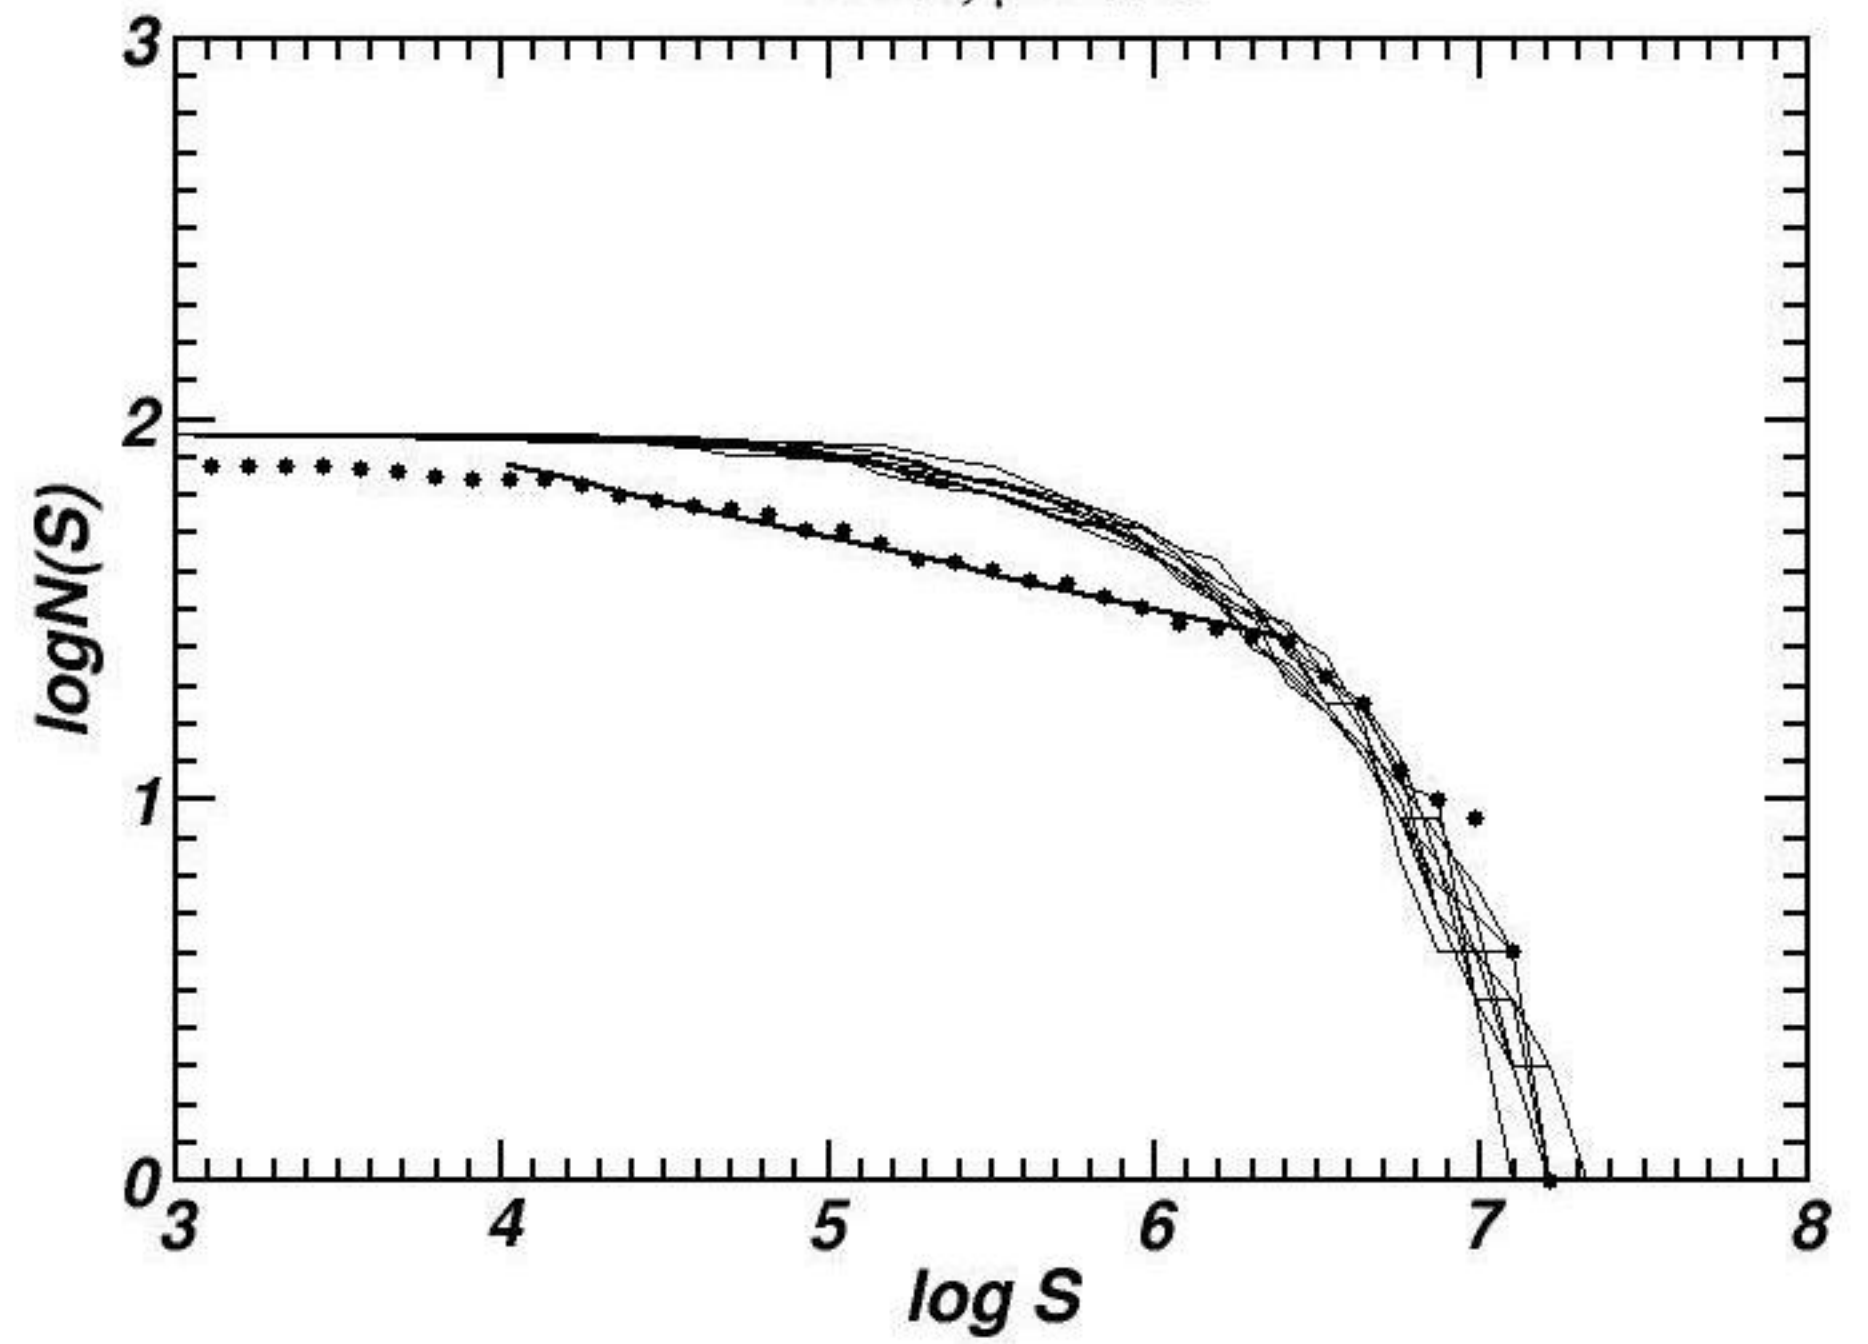

**EU100+ CNEs on 100kb masked hg18: chr5**

$E = 2.95, \mu = 0.44$

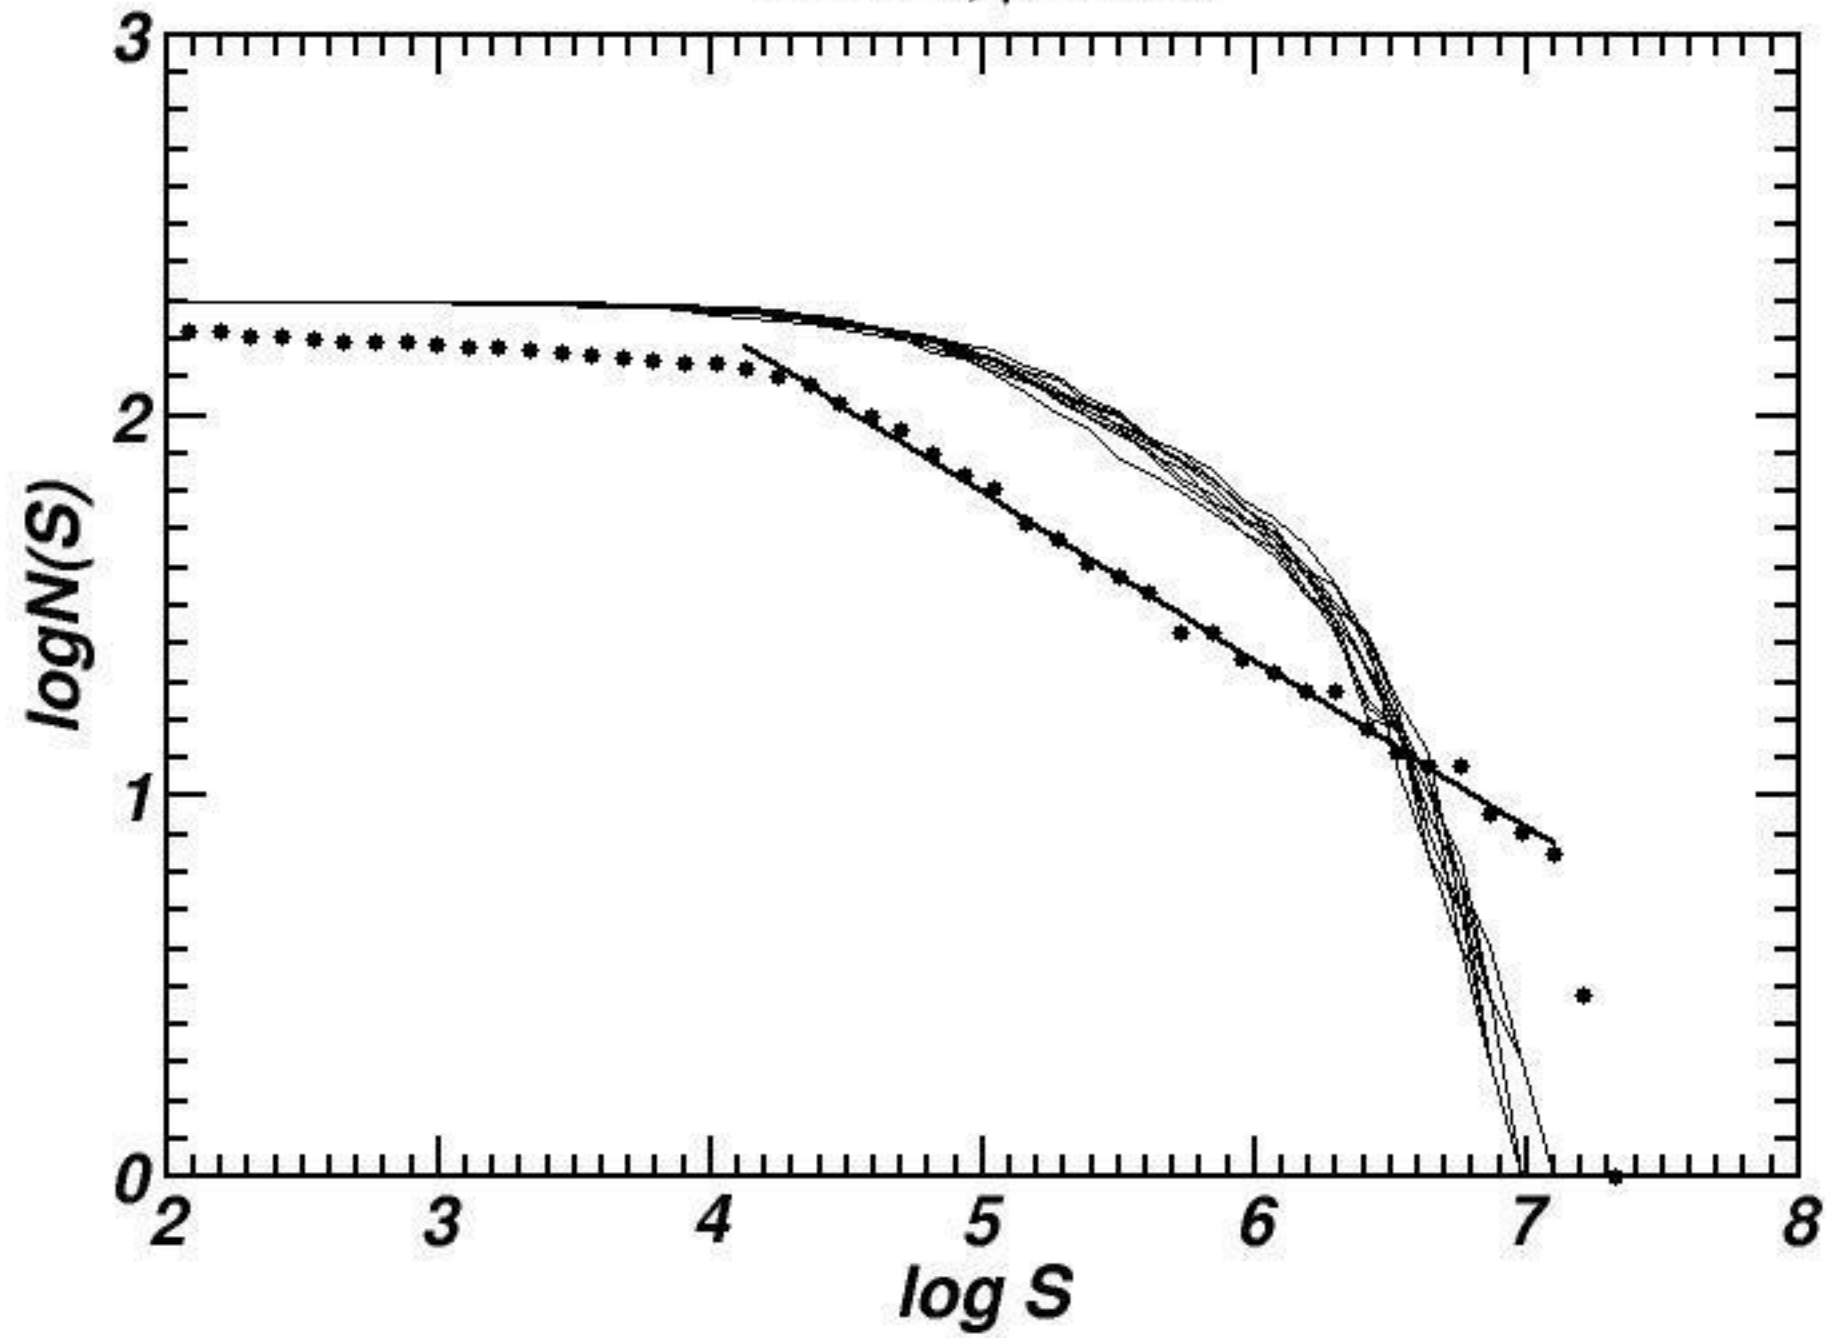

**EU100+ CNEs on 100kb masked hg18: chr10**

$E = 3, \mu = 0.32$

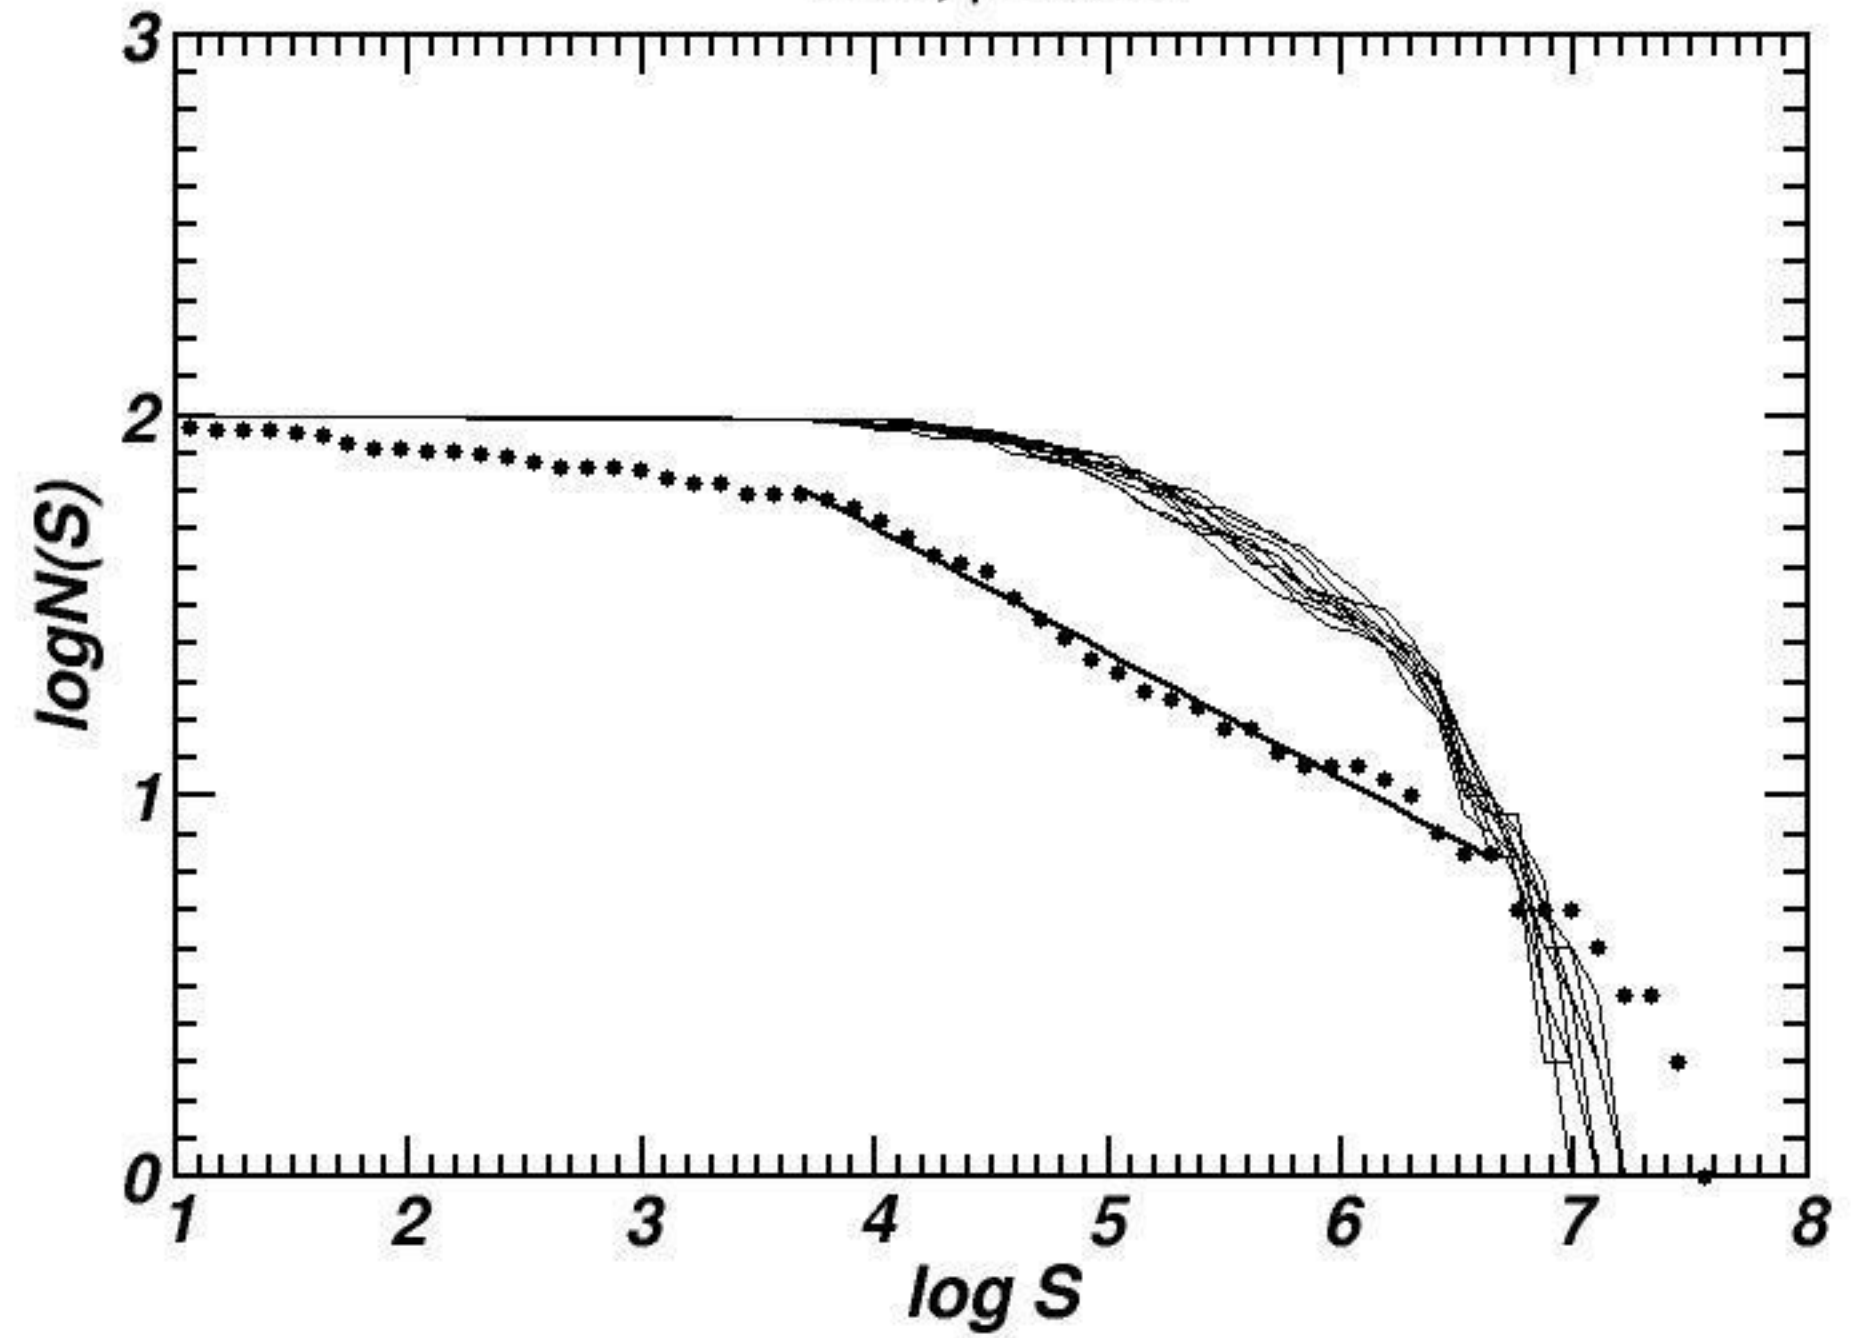

Supplement: pone.0095437.s004.pdf [file pone.0095437.s004.pdf]
