# Supplementary material for: Conserved Noncoding Elements Follow Power-Law-Like Distributions in Several Genomes as a Result of Genome Dynamics
Source: PubMed Central journal article supplement (PMC4008492; doi:10.1371/journal.pone.0095437), 2014-05-02
Supplement: pone.0095437.s003.pdf [file pone.0095437.s003.pdf]

# Amniotic CNEs (Dataset iib)

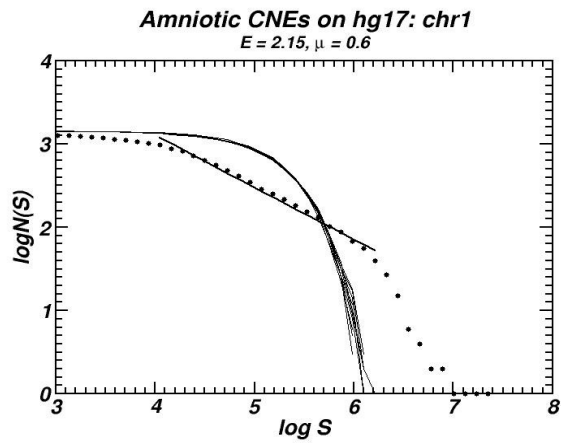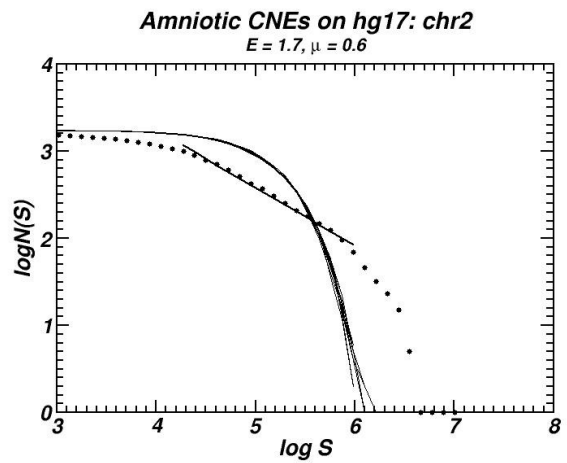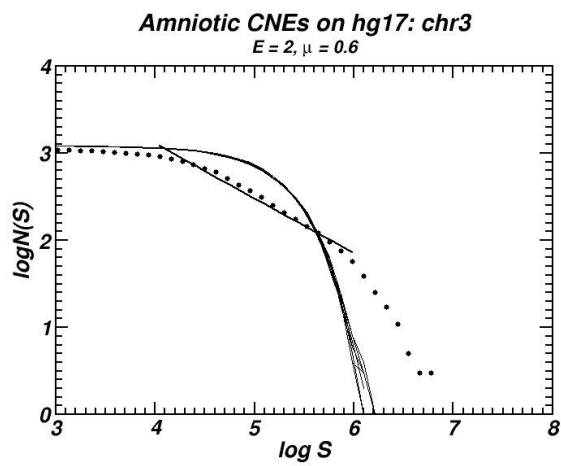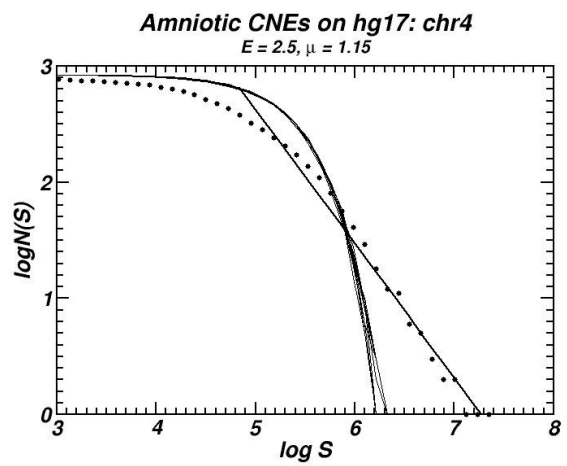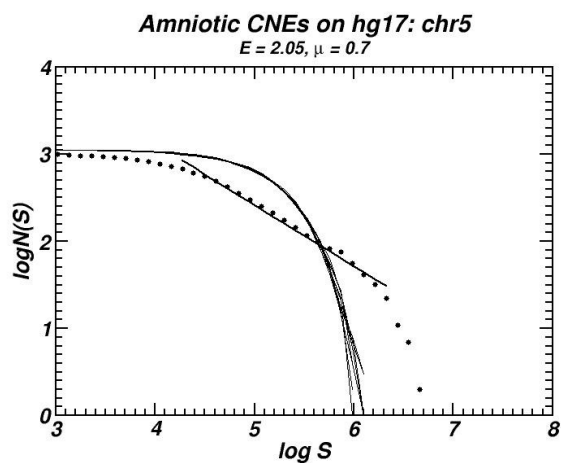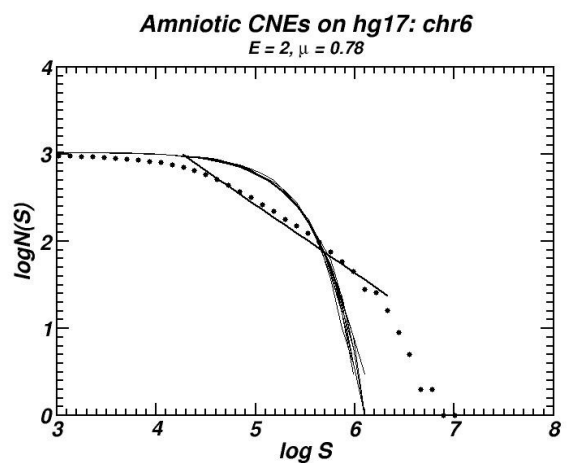

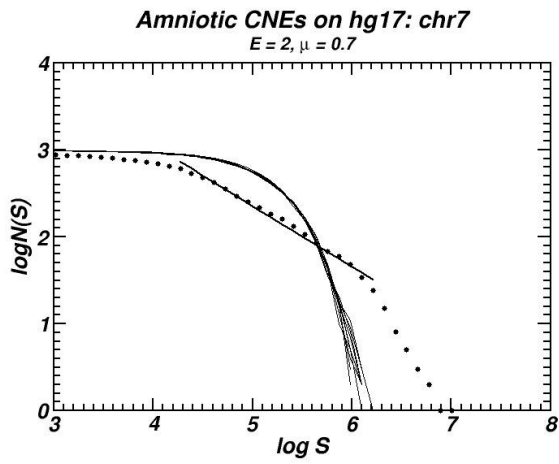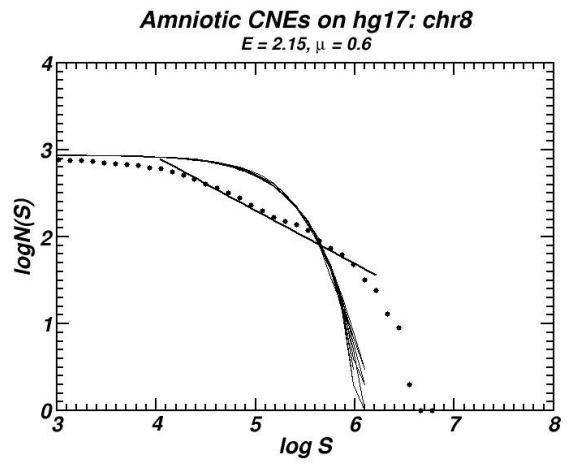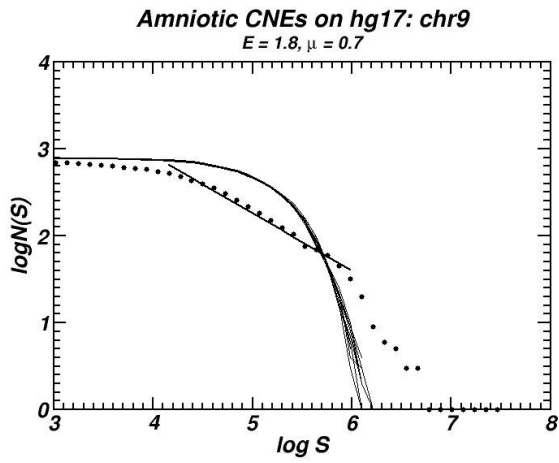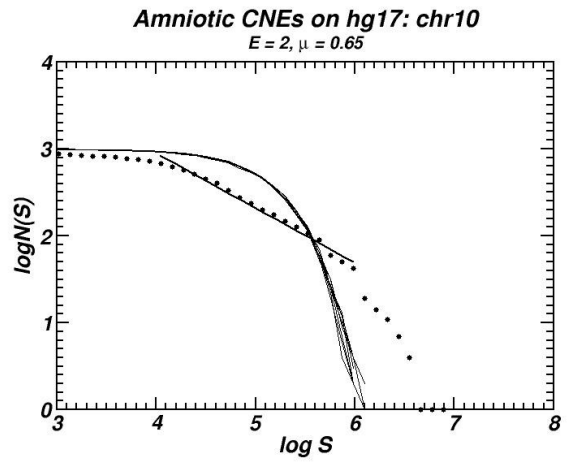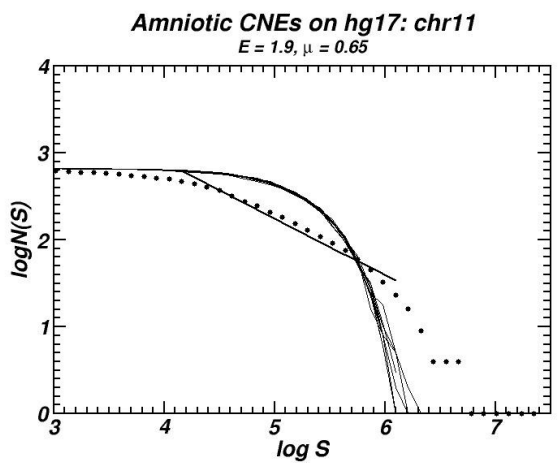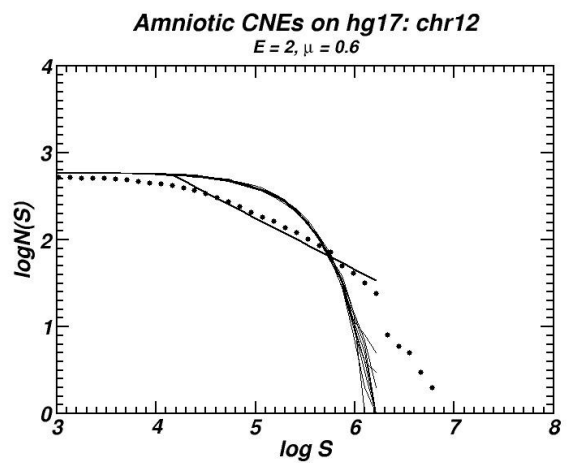

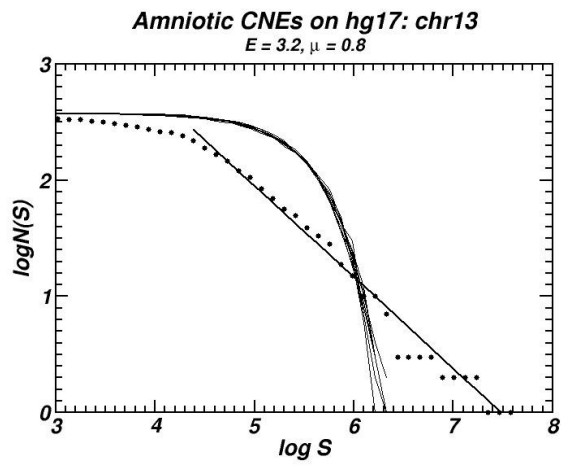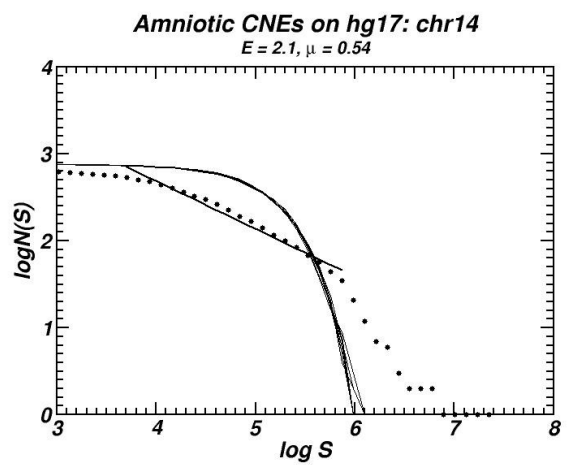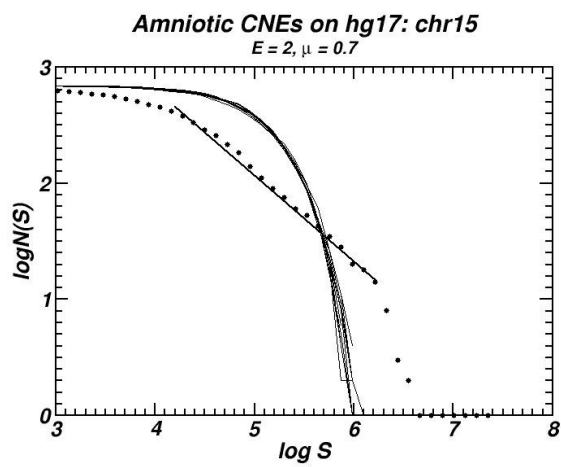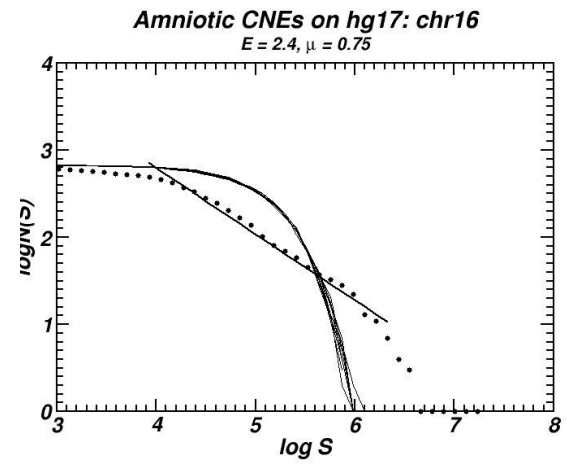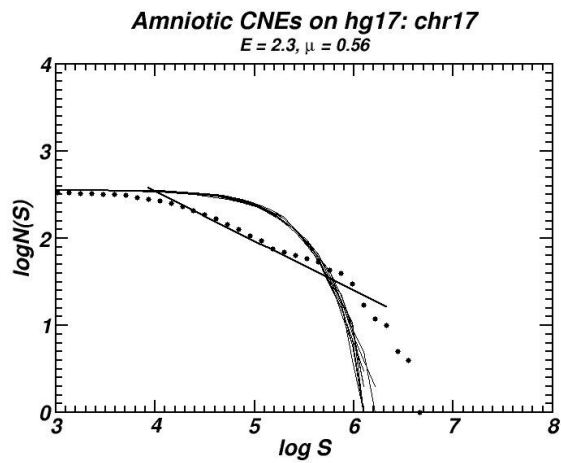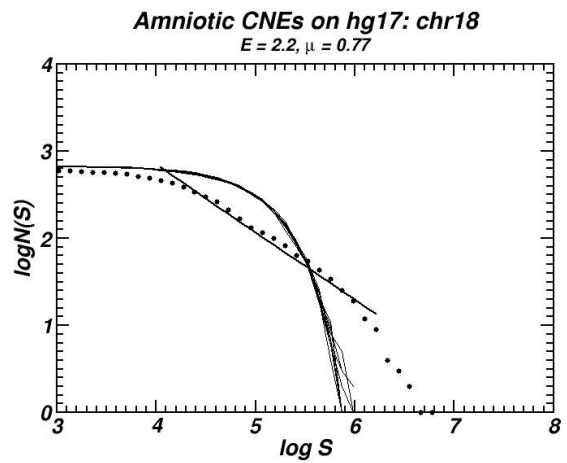

**Amniotic CNEs on hg17: chr19**  
 $E = 3.8, \mu = 0.6$

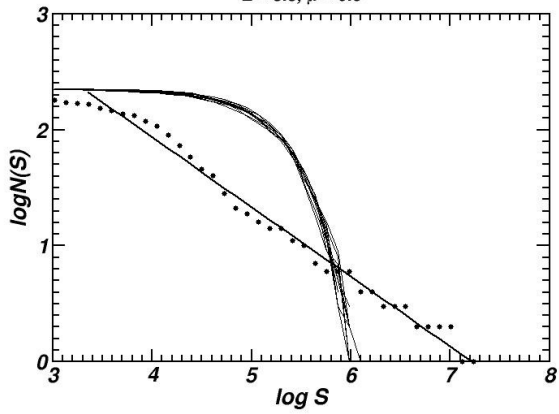

**Amniotic CNEs on hg17: chr20**  
 $E = 2.4, \mu = 0.68$

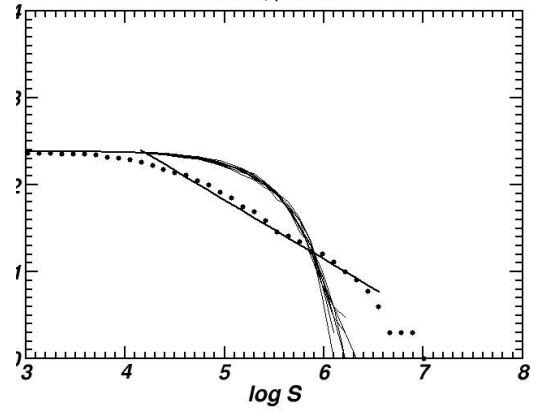

**Amniotic CNEs on hg17: chr21**  
 $E = 2, \mu = 0.52$

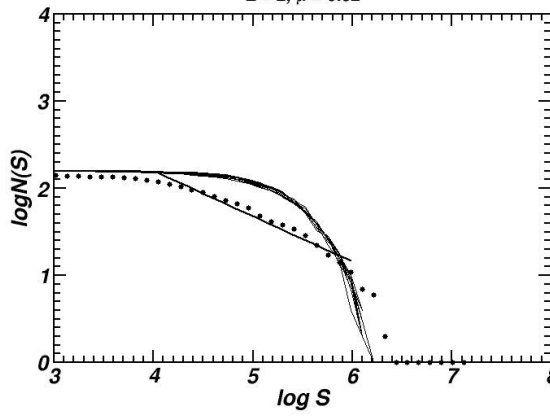

**Amniotic CNEs on hg17: chr22**  
 $E = 1.8, \mu = 0.5$

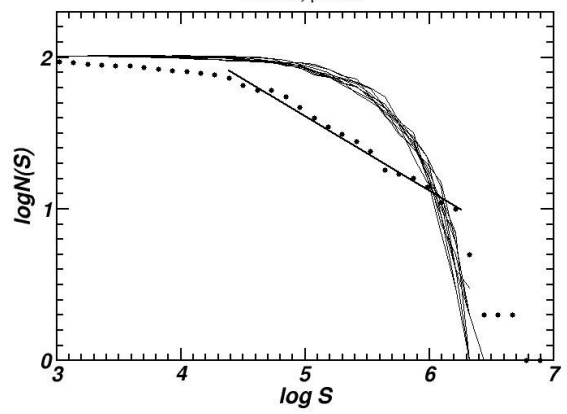



# Amniotic CNEs on gene-masked genome

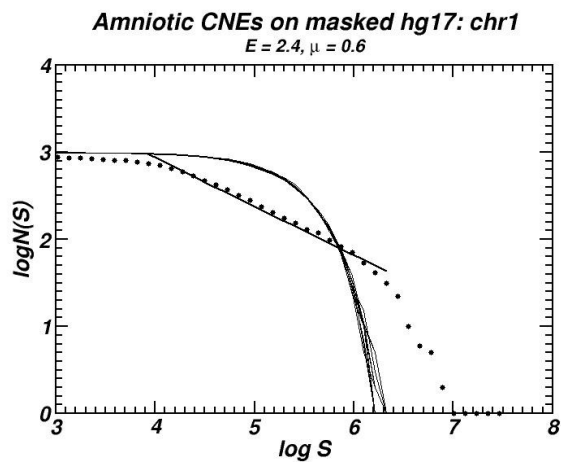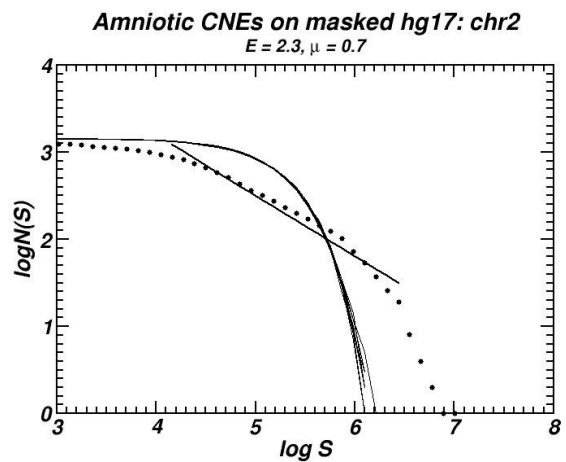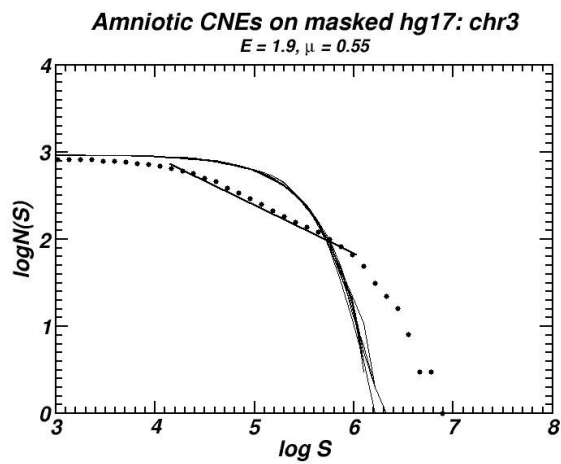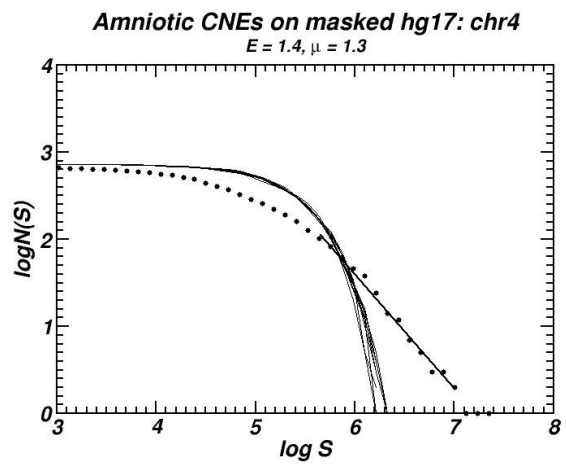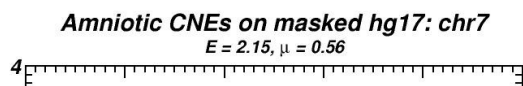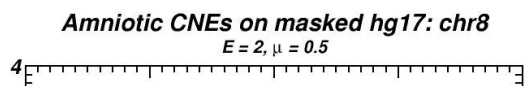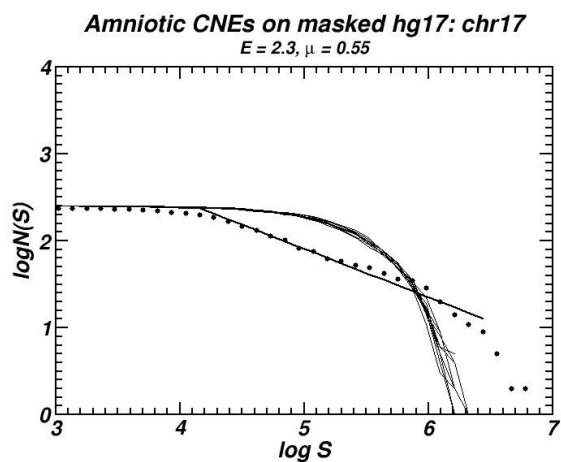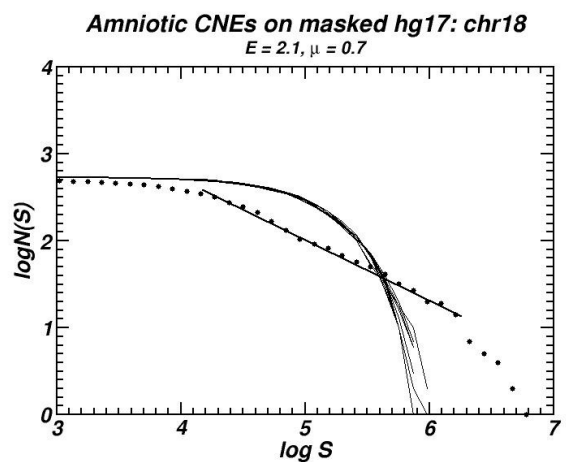

**Amniotic CNEs on masked hg17: chr19**  
 $E = 3.9, \mu = 0.57$

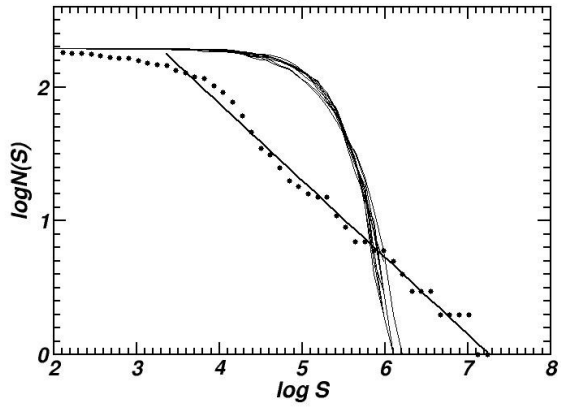

**Amniotic CNEs on masked hg17: chr20**  
 $E = 2.3, \mu = 0.55$

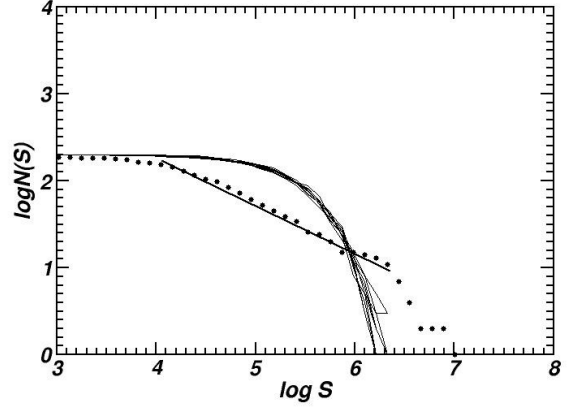

**Amniotic CNEs on masked hg17: chr21**  
 $E = 1.8, \mu = 0.5$

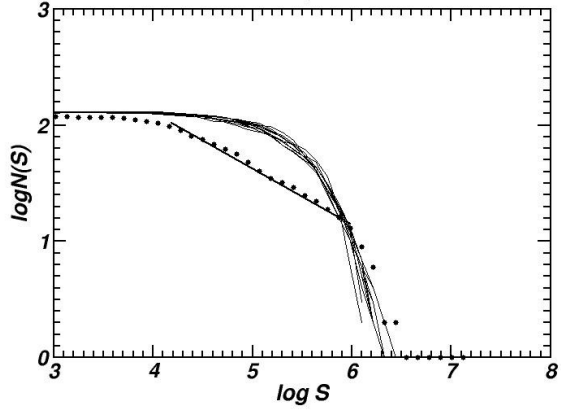

**Amniotic CNEs on masked hg17: chr22**  
 $E = 2.6, \mu = 0.5$

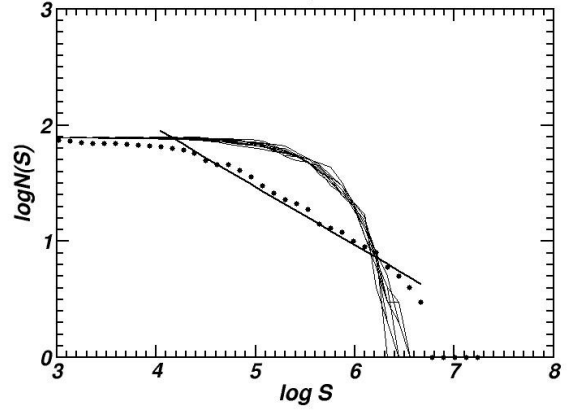

# Mammalian CNEs (Dataset iia)

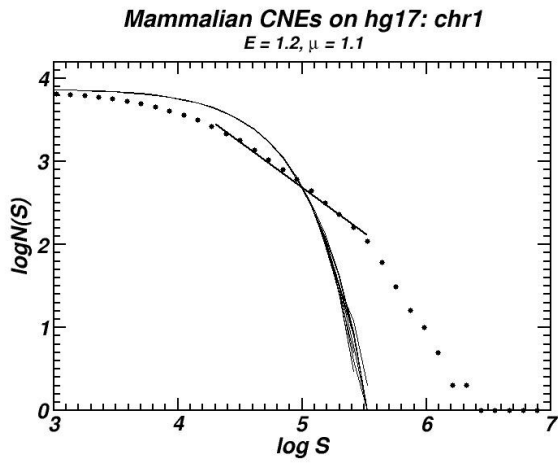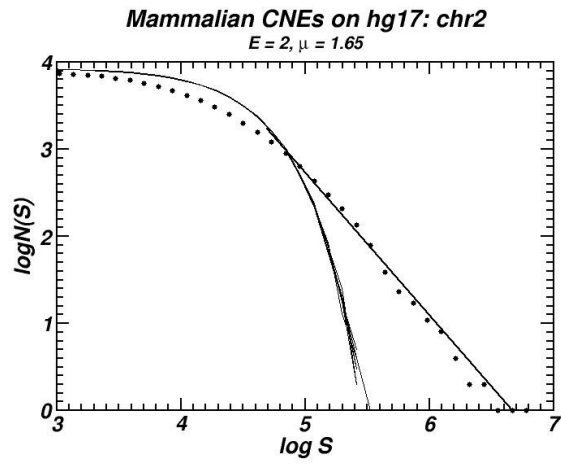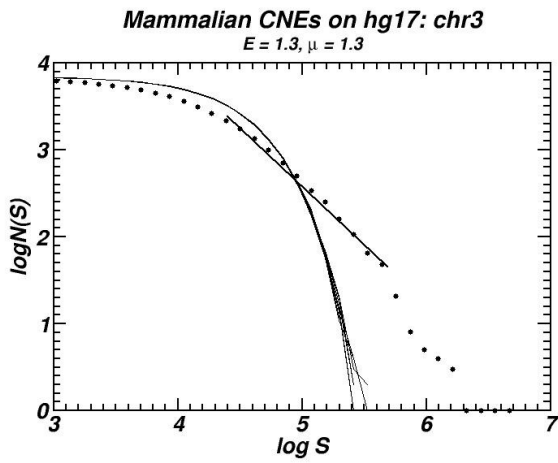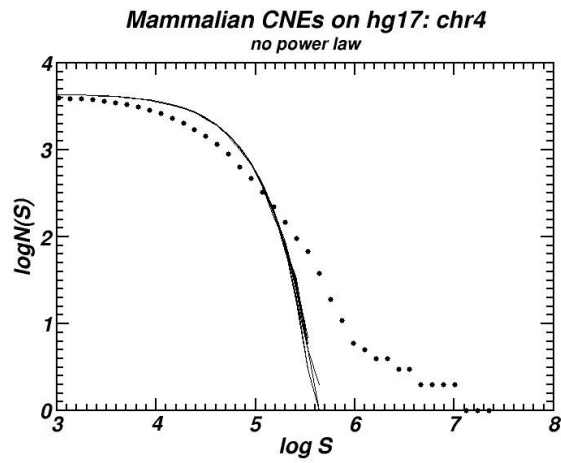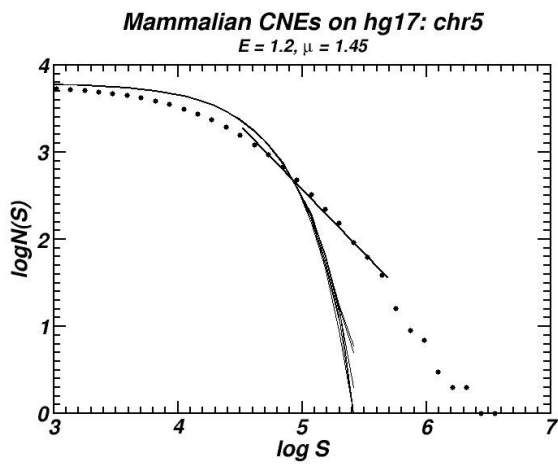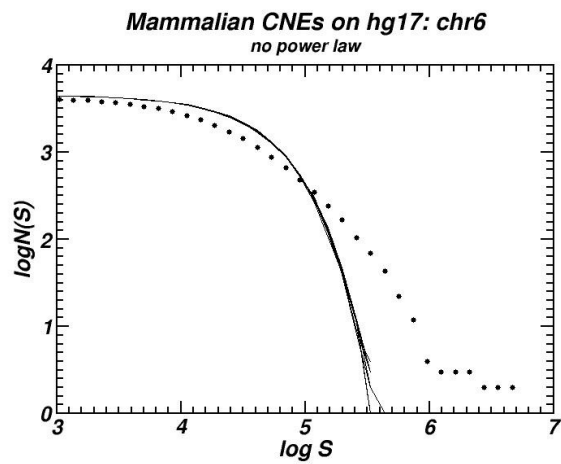

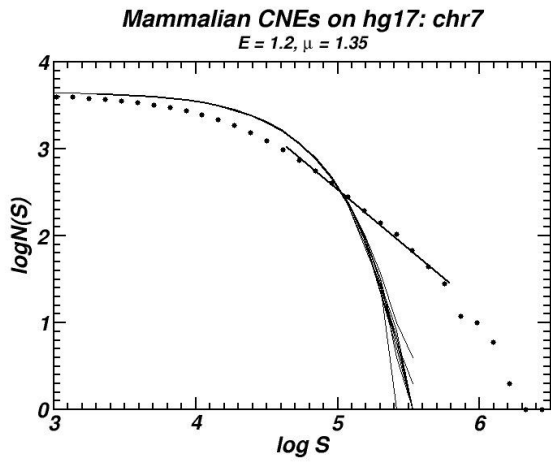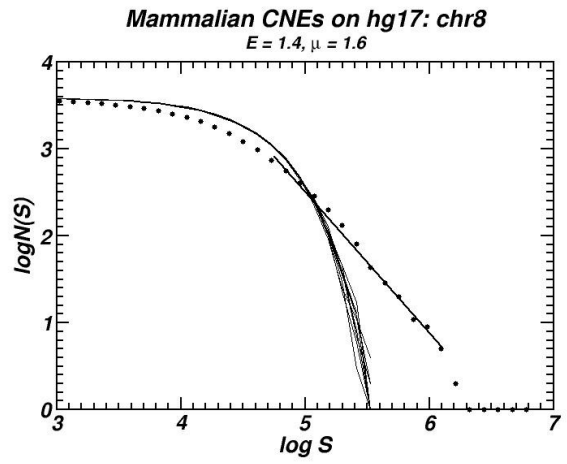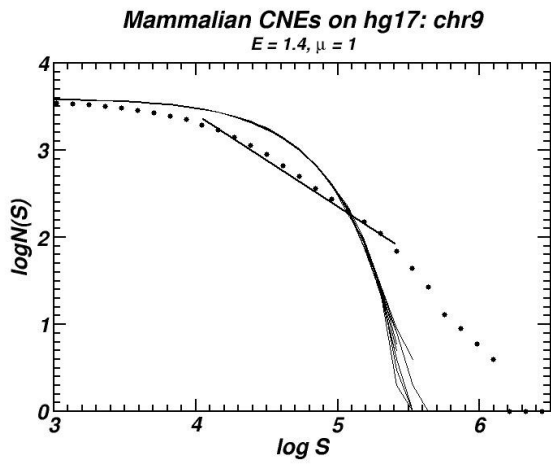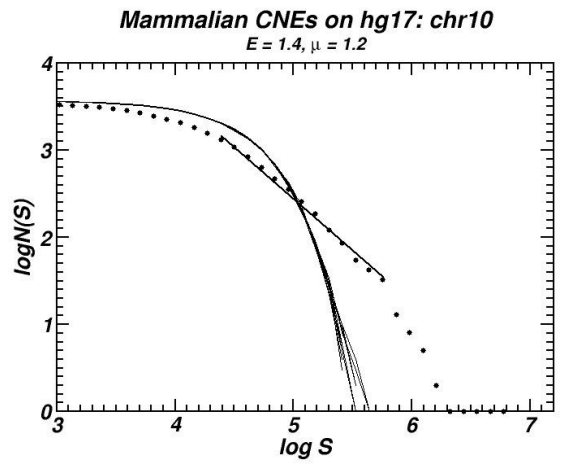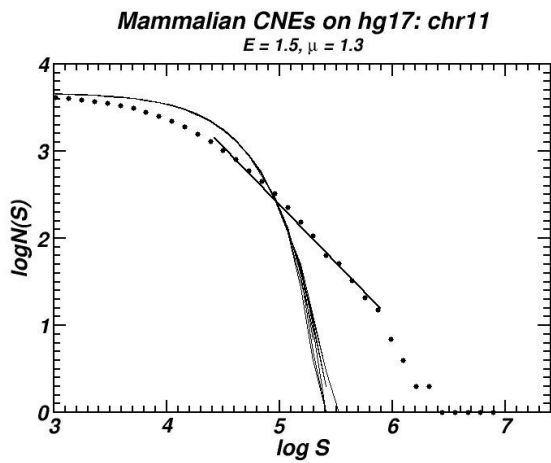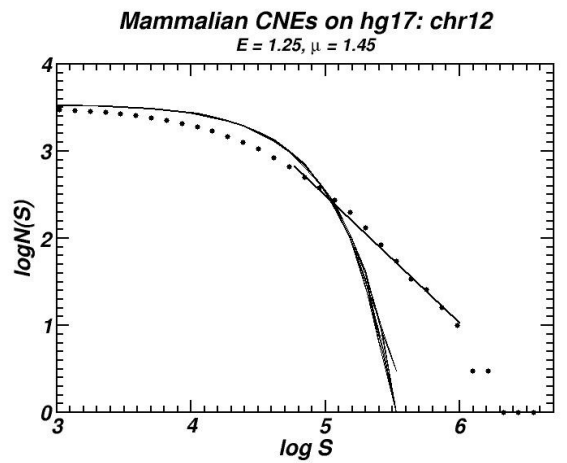

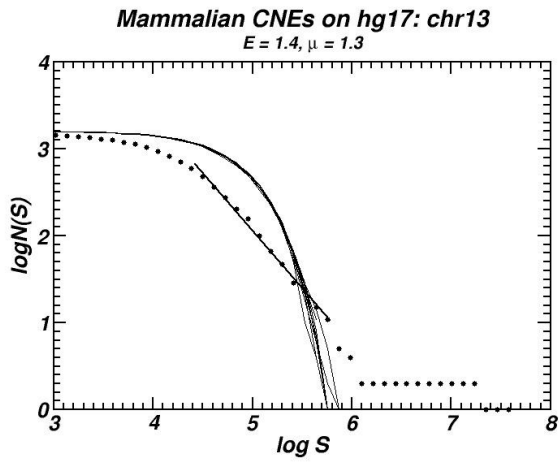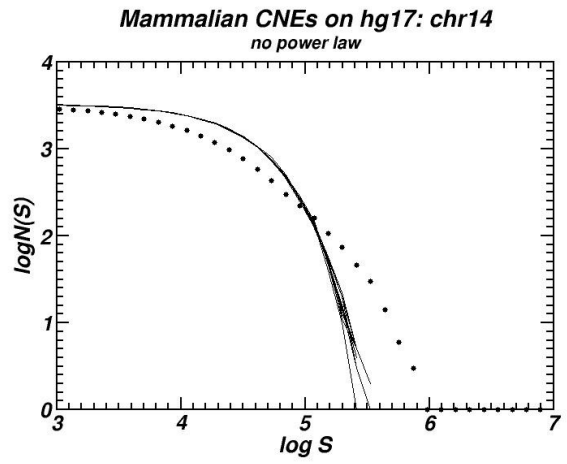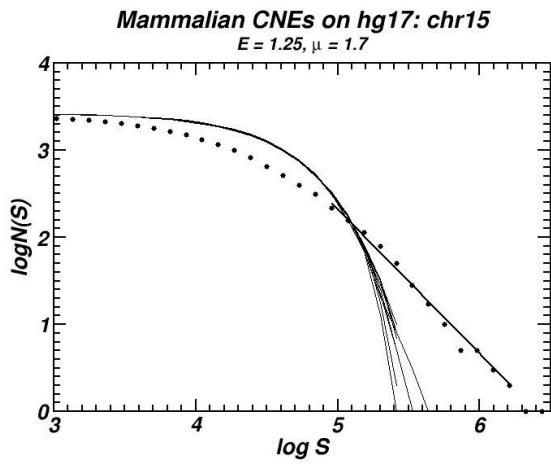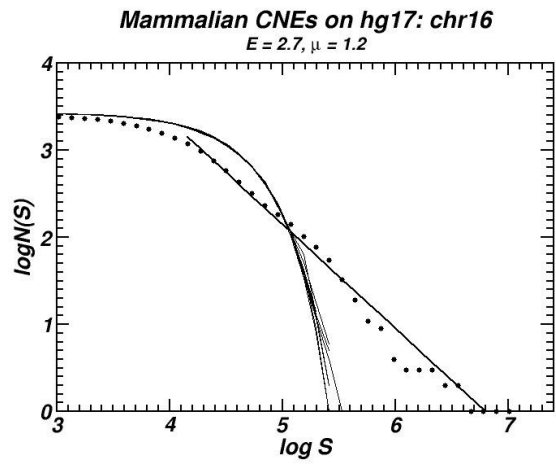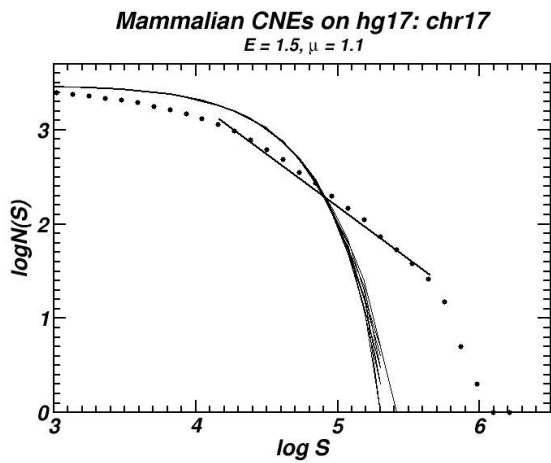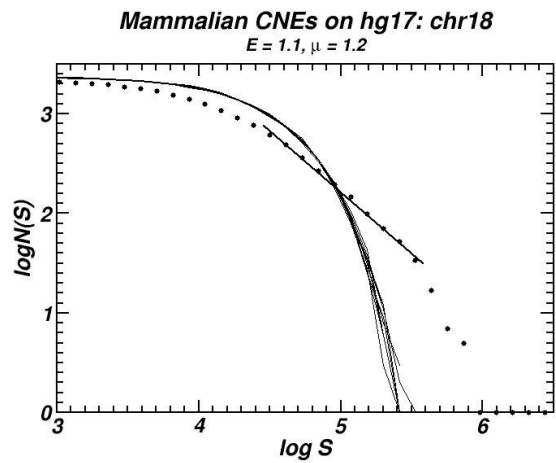

**Mammalian CNEs on hg17: chr19**

$E = 2.1, \mu = 0.6$

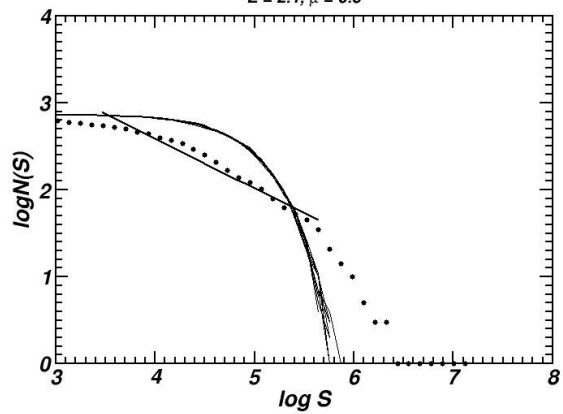

**Mammalian CNEs on hg17: chr20**

$E = 1.6, \mu = 1.4$

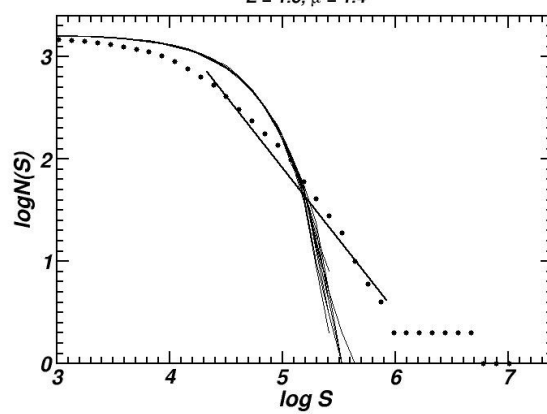

**Mammalian CNEs on hg17: chr21**

$E = 1.6, \mu = 1.25$

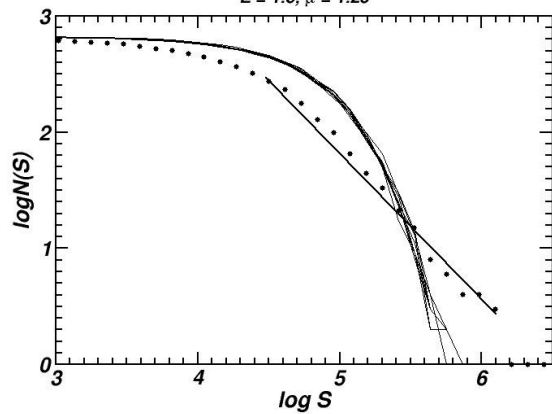

**Mammalian CNEs on hg17: chr22**

$E = 1.2, \mu = 1.15$

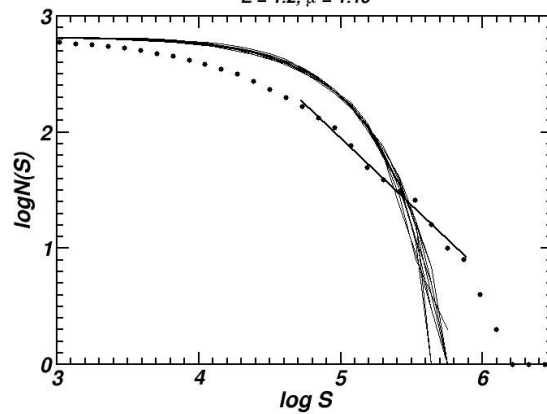

# Mammalian CNEs on gene-masked genome

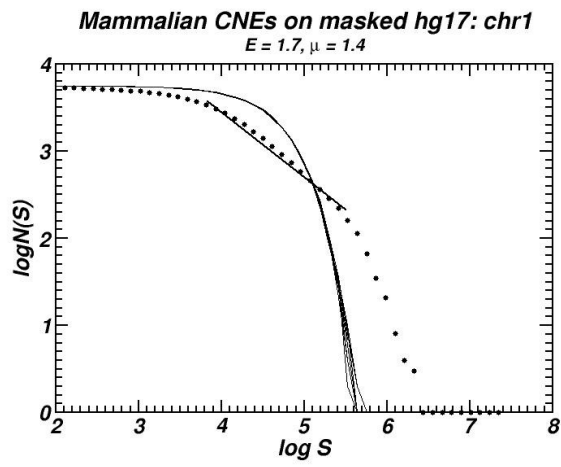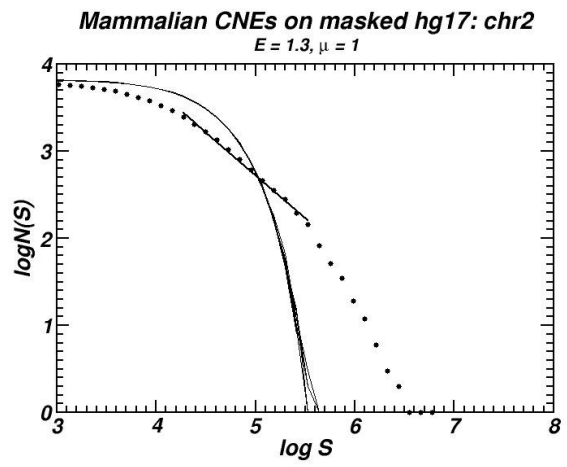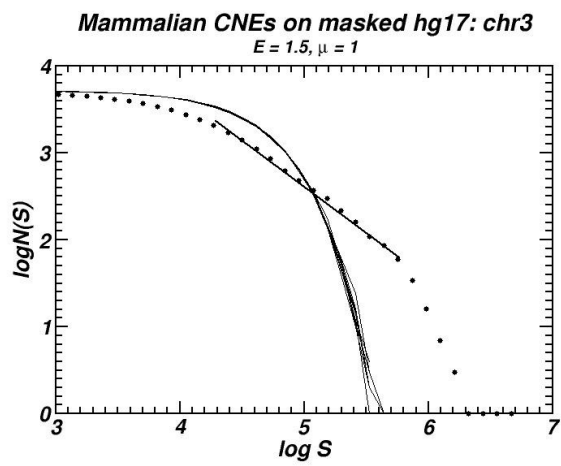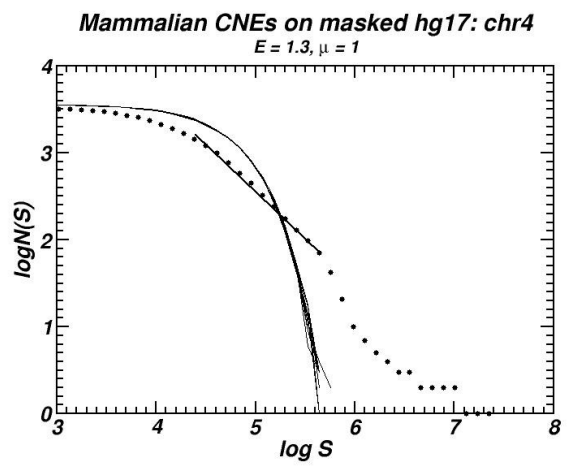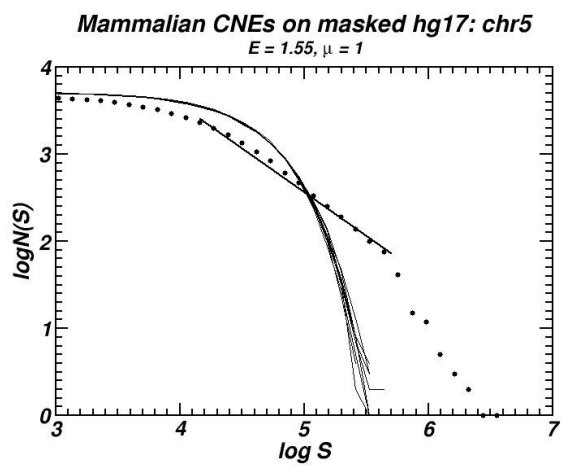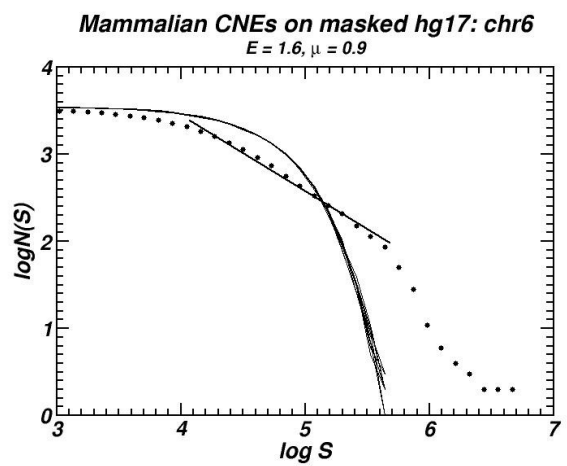

**Mammalian CNEs on masked hg17: chr7**  
 $E = 1.6, \mu = 0.9$

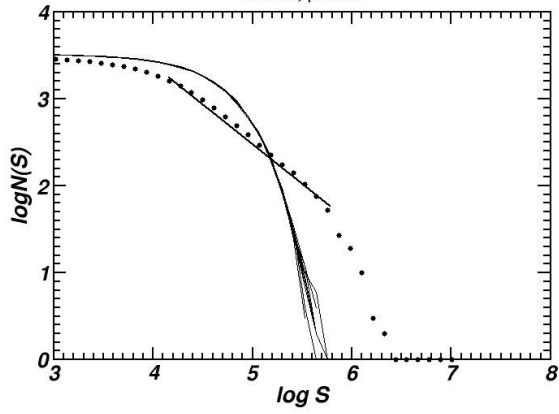

**Mammalian CNEs on masked hg17: chr8**  
 $E = 2.3, \mu = 1.3$

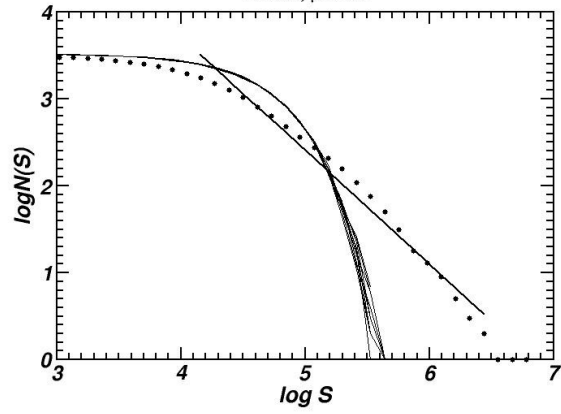

**Mammalian CNEs on masked hg17: chr9**  
 $E = 1.5, \mu = 1$

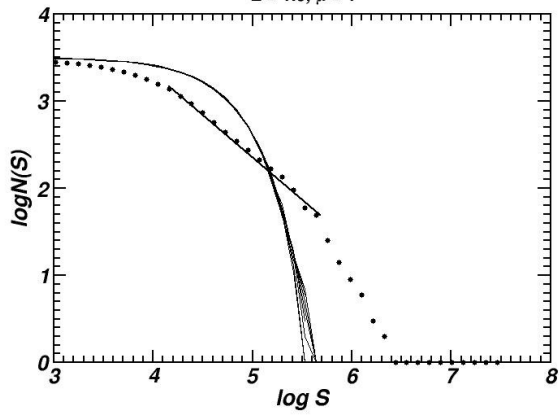

**Mammalian CNEs on masked hg17: chr10**  
 $E = 1.4, \mu = 1$

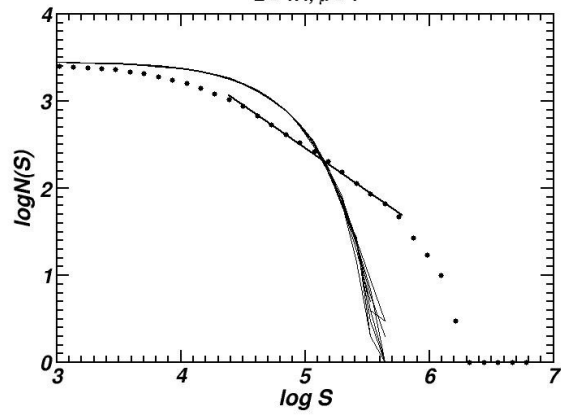

**Mammalian CNEs on hg17: chr11**  
 $E = 1.5, \mu = 1$

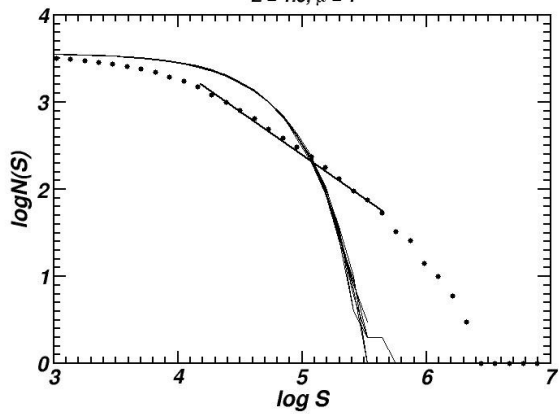

**Mammalian CNEs on masked hg17: chr12**  
 $E = 1.4, \mu = 1$

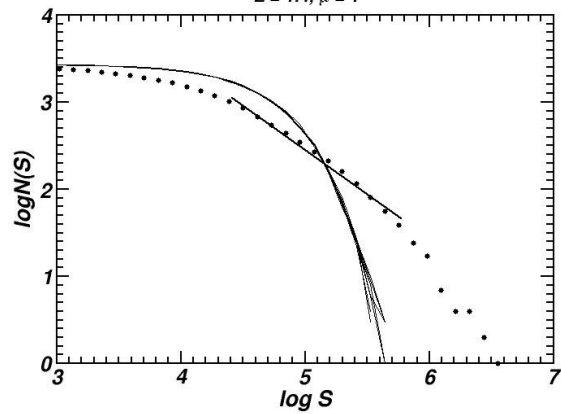



**Mammalian CNEs on masked hg17: chr13**  
 $E = 2.15, \mu = 1.1$

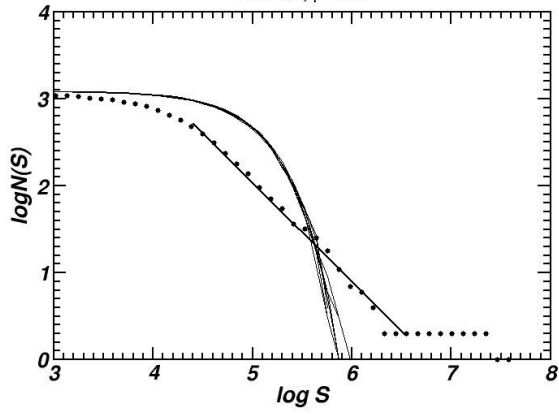

**Mammalian CNEs on masked hg17: chr14**  
 $E = 1.6, \mu = 1$

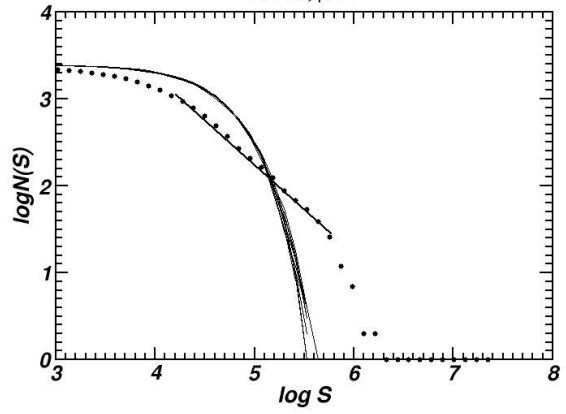

**Mammalian CNEs on masked hg17: chr15**  
 $E = 1.55, \mu = 0.9$

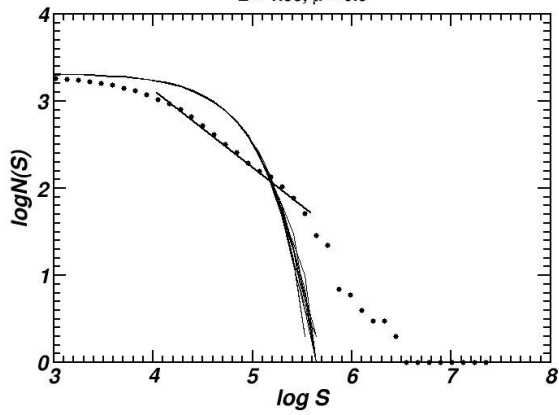

**Mammalian CNEs on masked hg17: chr16**  
 $E = 2.7, \mu = 1$

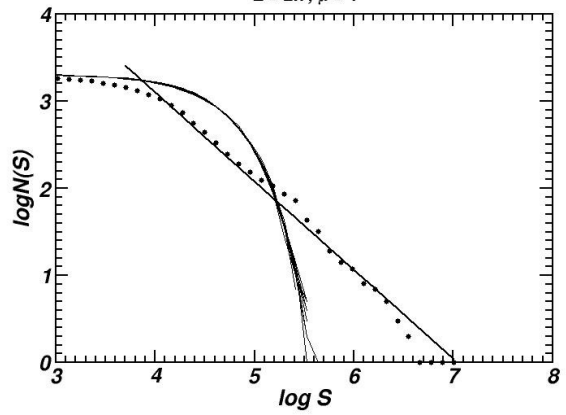

**Mammalian CNEs on masked hg17: chr17**  
 $E = 1.6, \mu = 0.9$

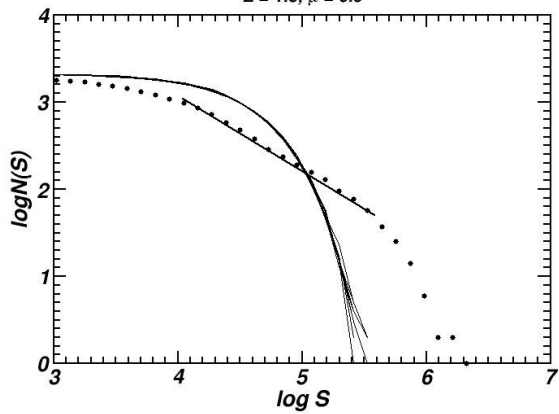

**Mammalian CNEs on masked hg17: chr18**  
 $E = 1.65, \mu = 0.85$

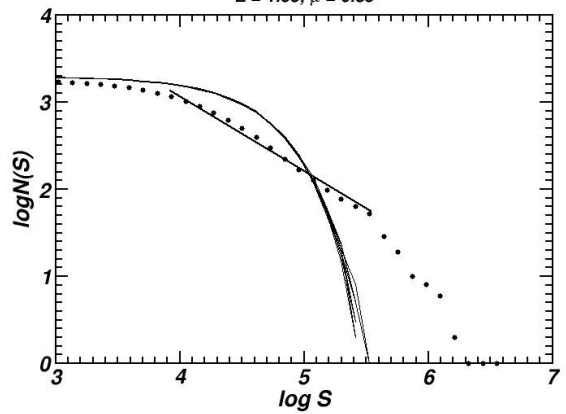

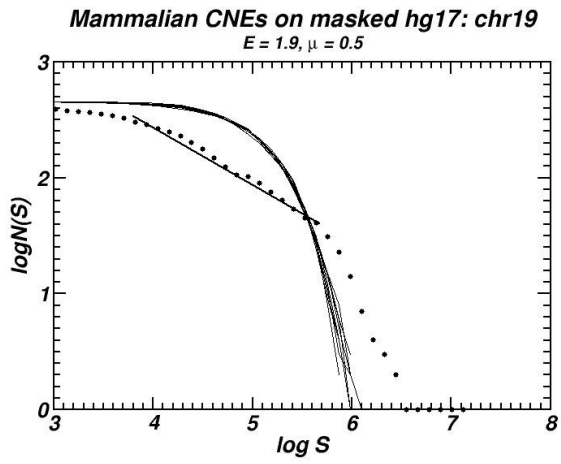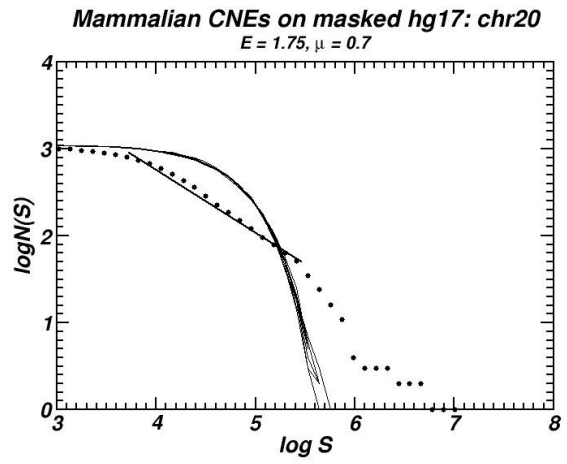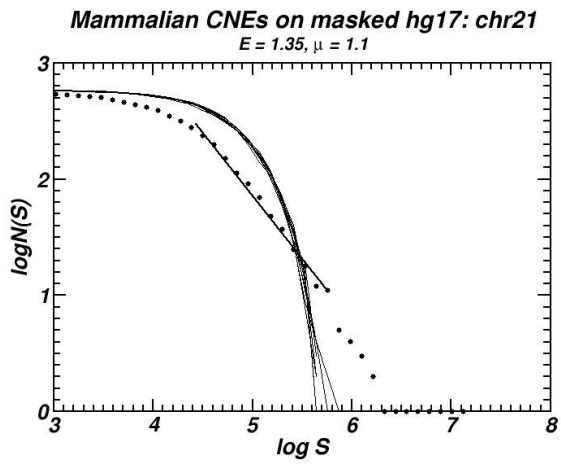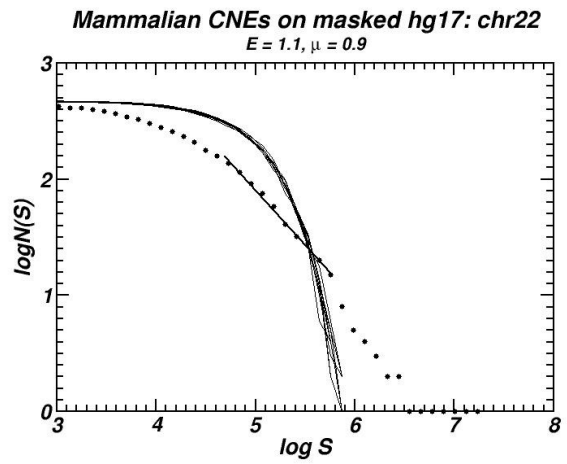

# EU100+ CNEs (Dataset i)

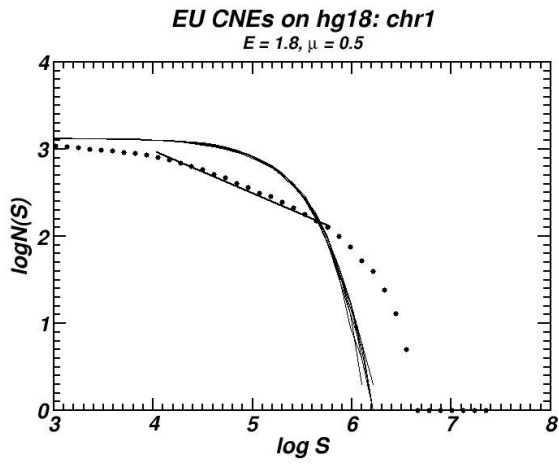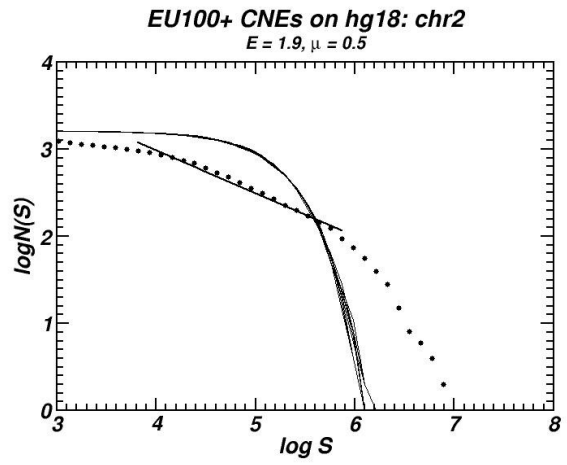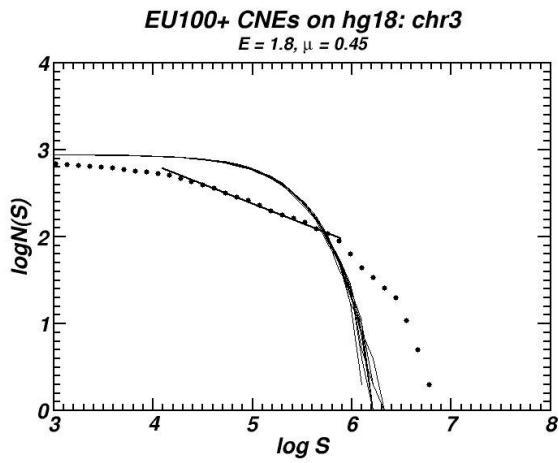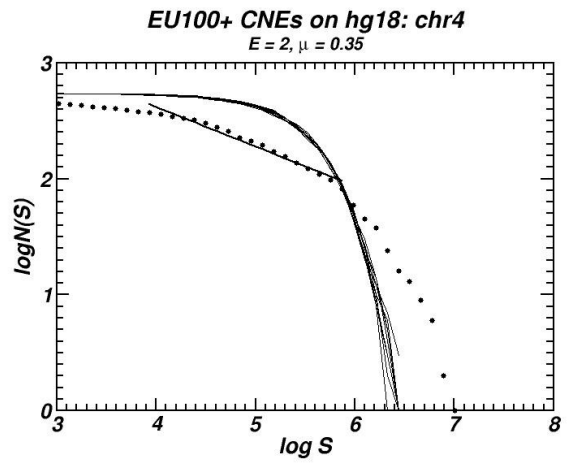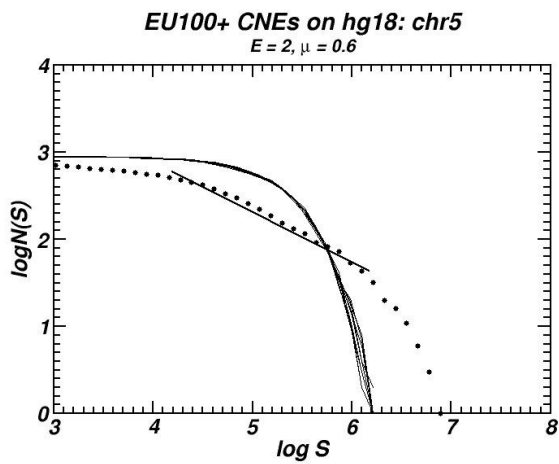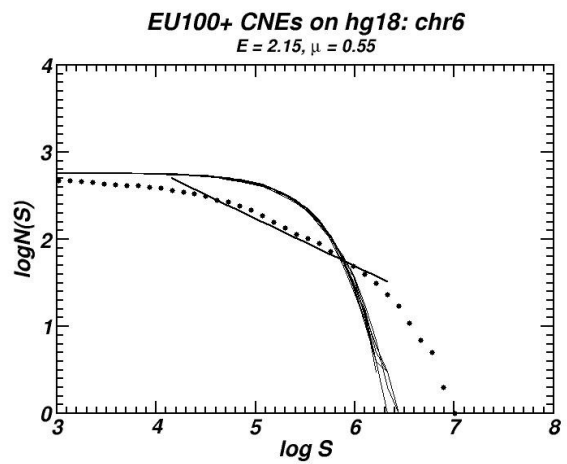

**EU100+ CNEs on hg18: chr7**  
 $E = 2.1, \mu = 0.55$

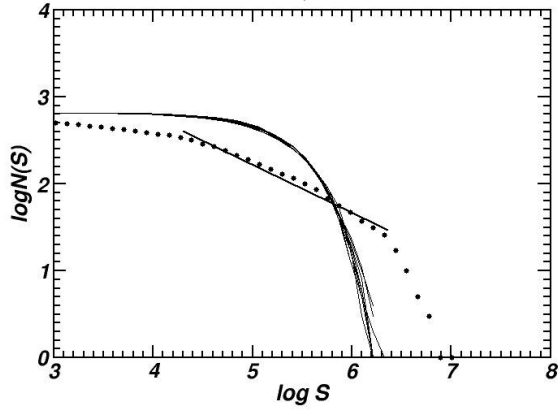

**EU100+ CNEs on hg18: chr8**  
 $E = 1.85, \mu = 0.6$

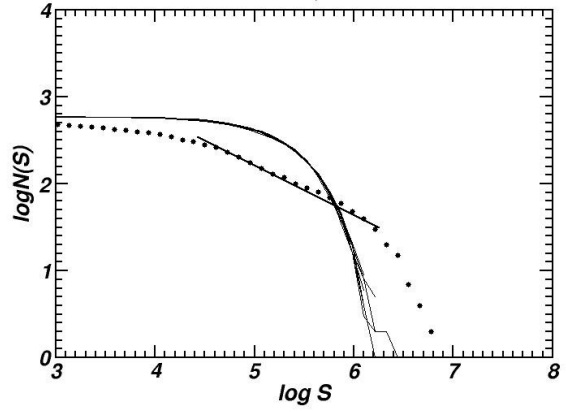

**EU100+ CNEs on hg18: chr9**  
 $E = 1.65, \mu = 1$

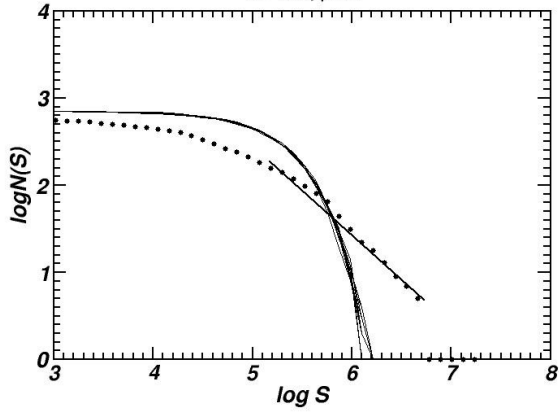

**EU100+ CNEs on hg18: chr10**  
 $E = 2, \mu = 0.5$

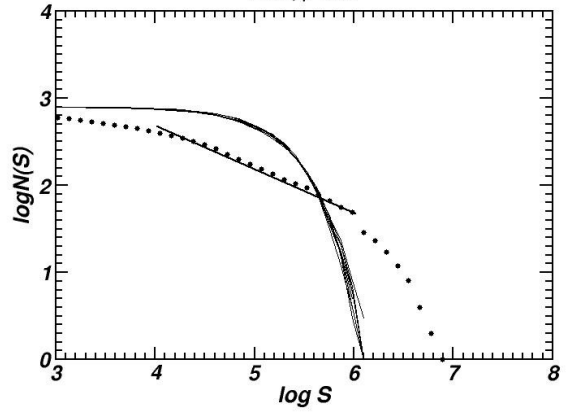

**EU100+ CNEs on hg18: chr11**  
 $E = 1.85, \mu = 0.5$

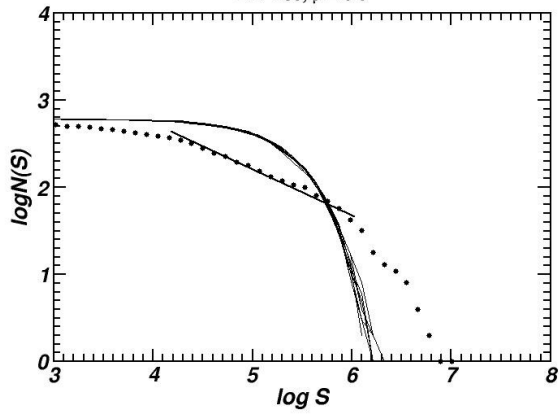

**EU100+ CNEs on hg18: chr12**  
 $E = 1.75, \mu = 0.4$

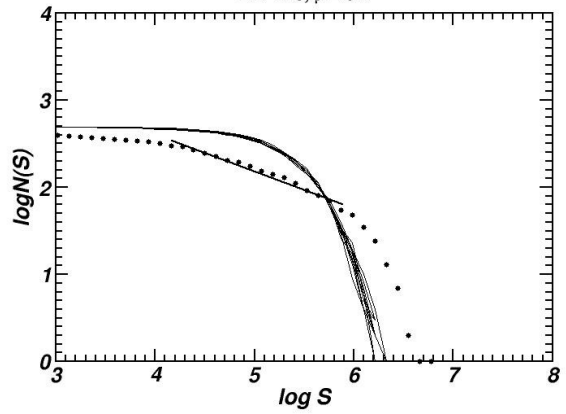

**EU100+ CNEs on hg18: chr13**  
 $E = 2.4, \mu = 0.35$

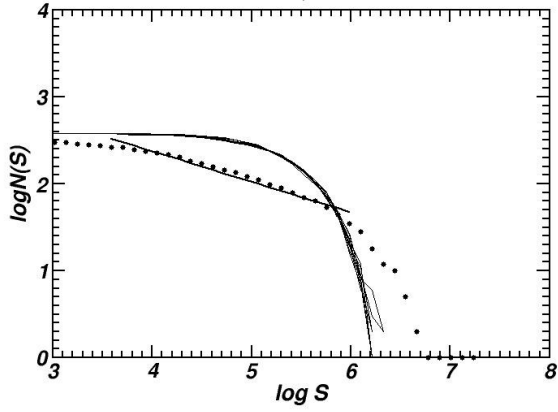

**EU100+ CNEs on hg18: chr14**  
 $E = 2, \mu = 0.6$

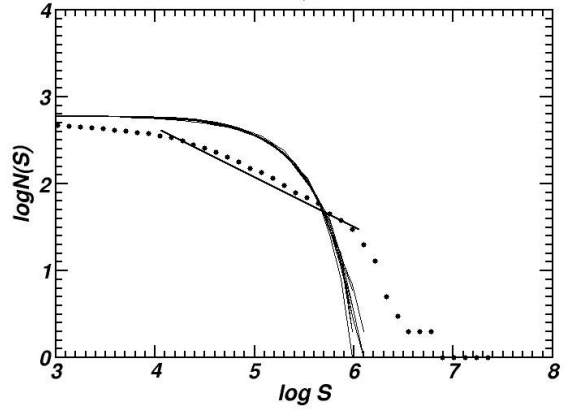

**EU100+ CNEs on hg18: chr15**  
 $E = 2, \mu = 0.6$

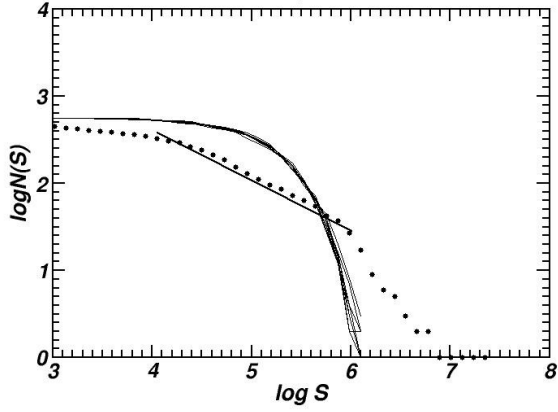

**EU100+ CNEs on hg18: chr16**  
 $E = 2.2, \mu = 0.6$

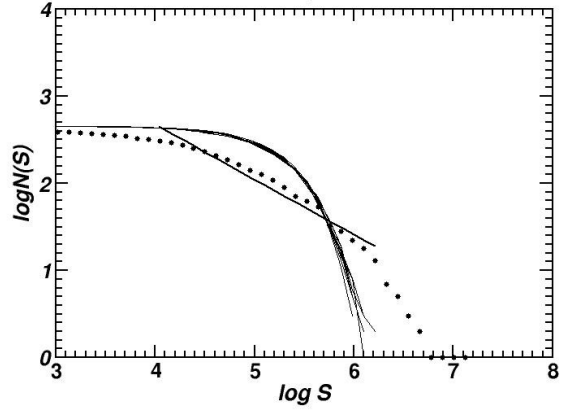

**EU100+ CNEs on hg18: chr17**  
 $E = 1.9, \mu = 0.3$

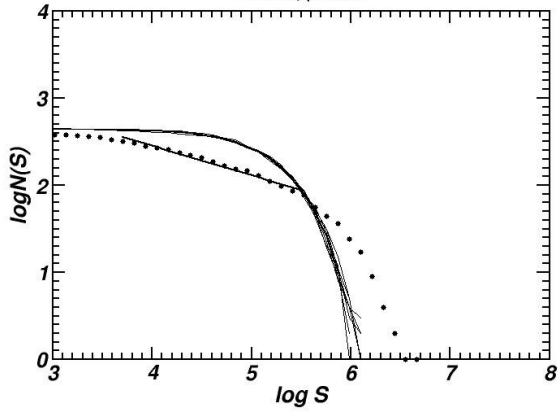

**EU100+ CNEs on hg18: chr18**  
 $E = 2.15, \mu = 0.6$

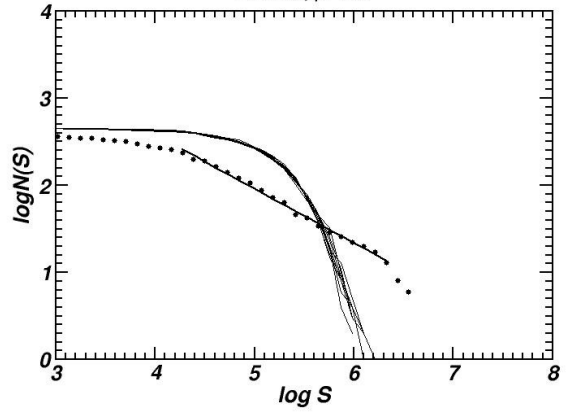

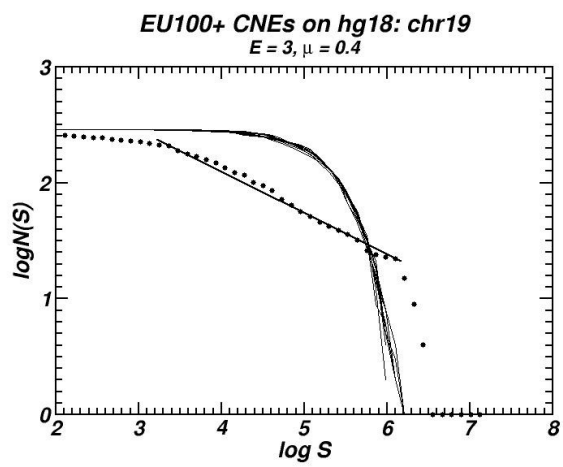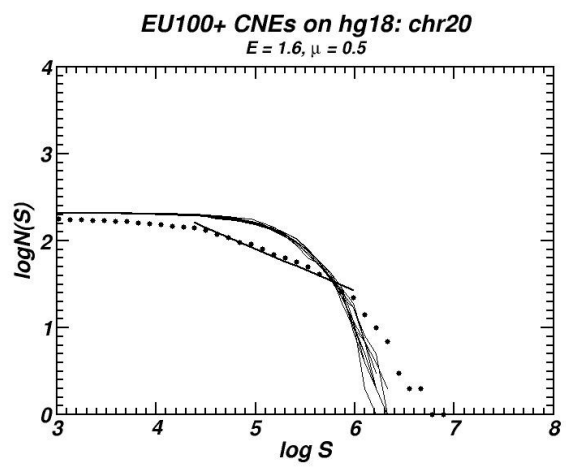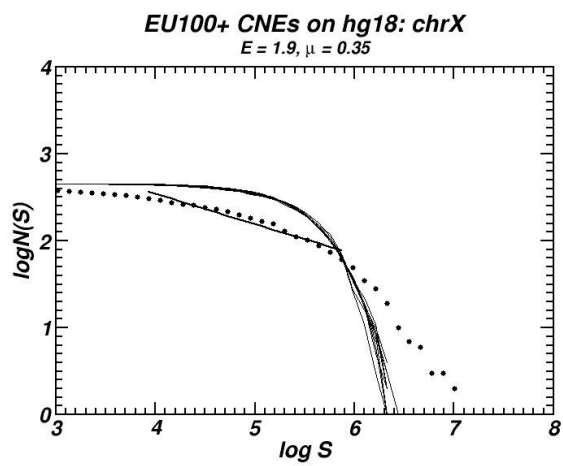

# EU100+ CNEs on gene-masked genome

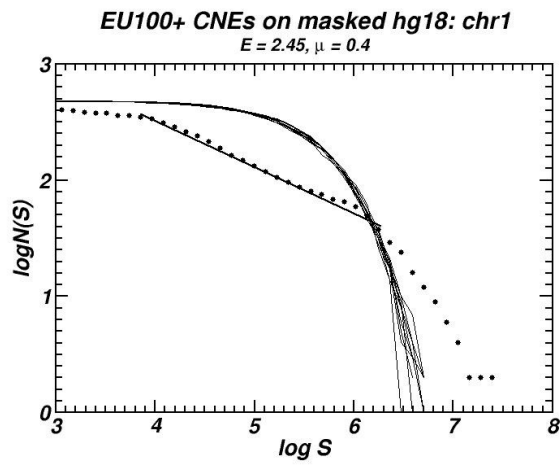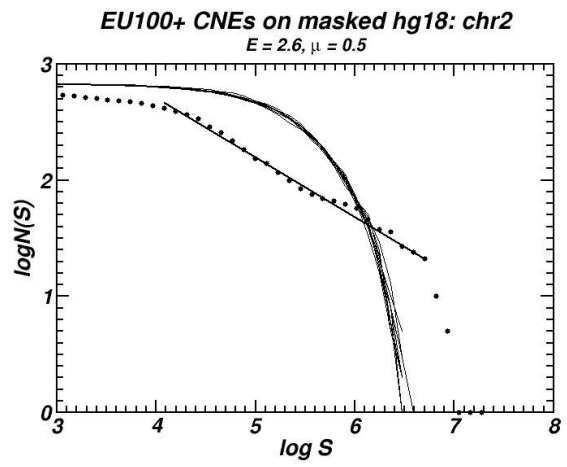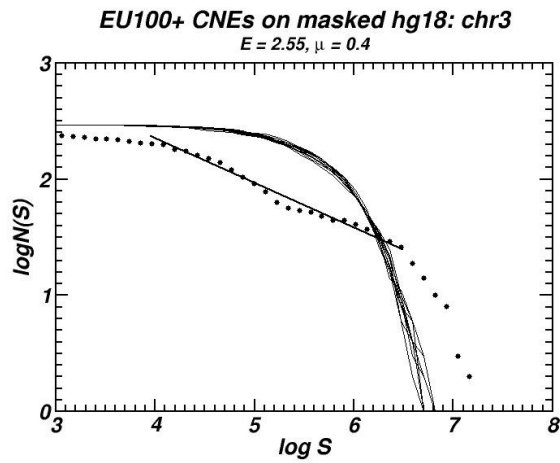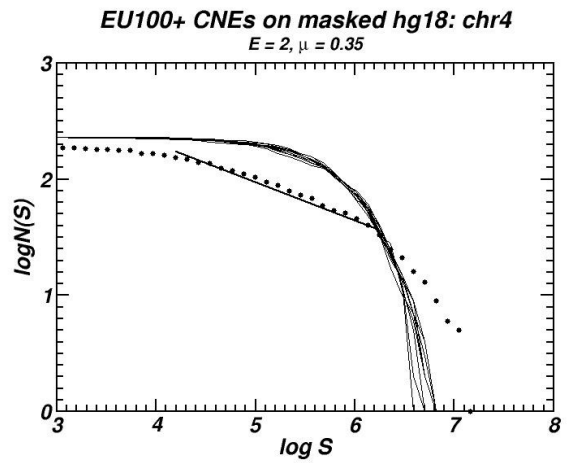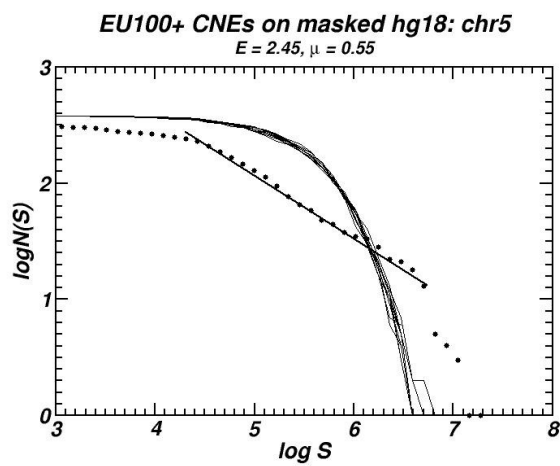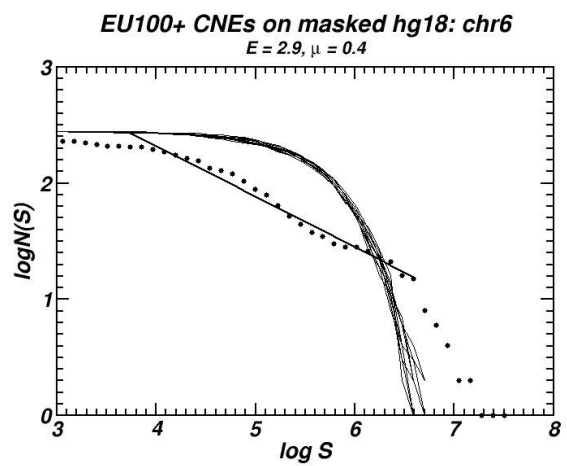

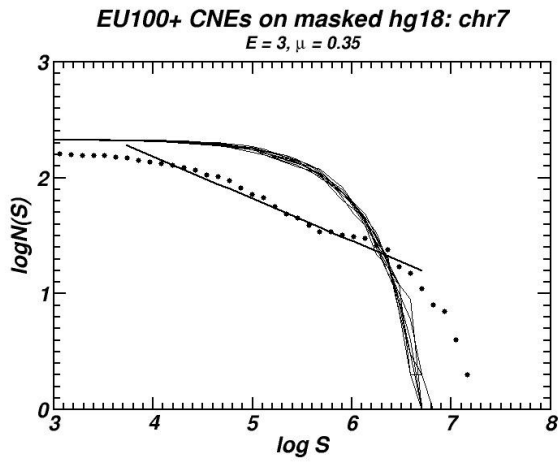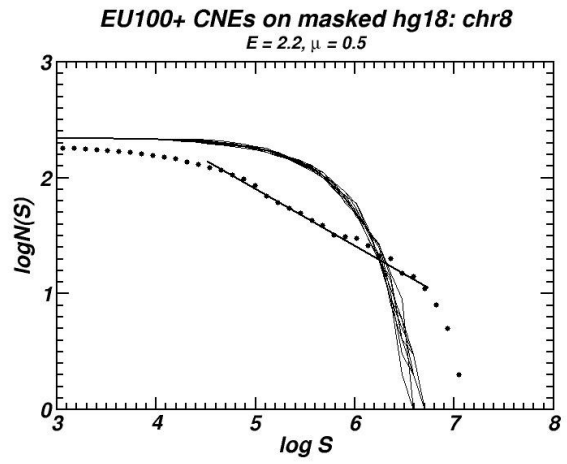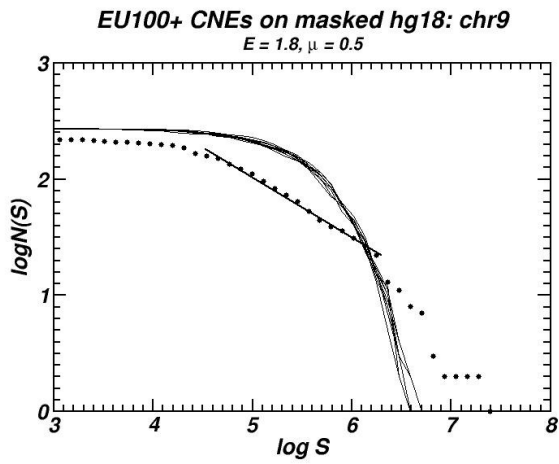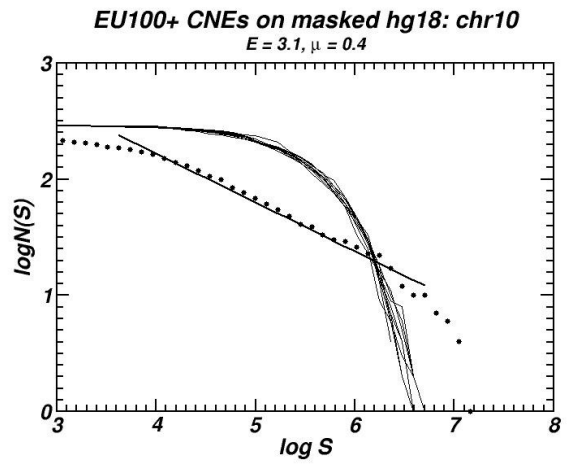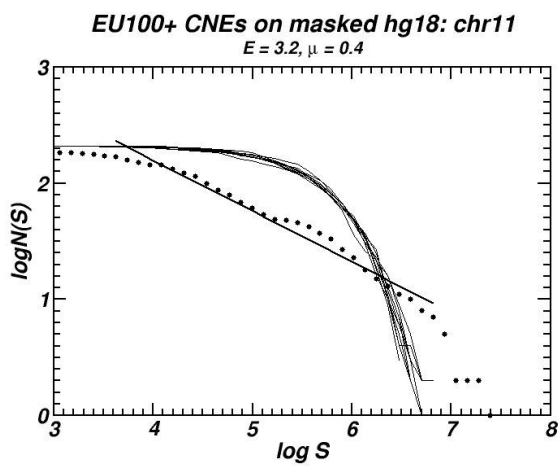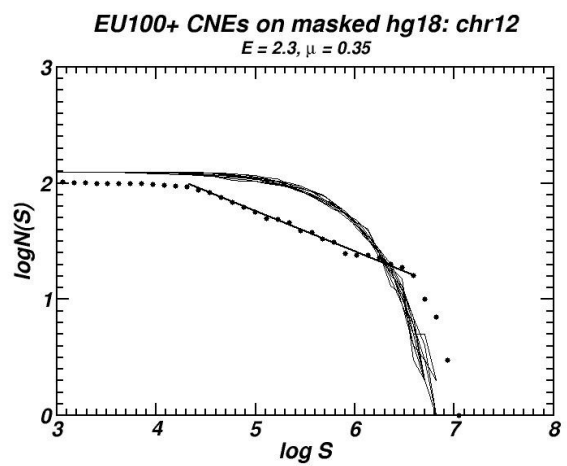



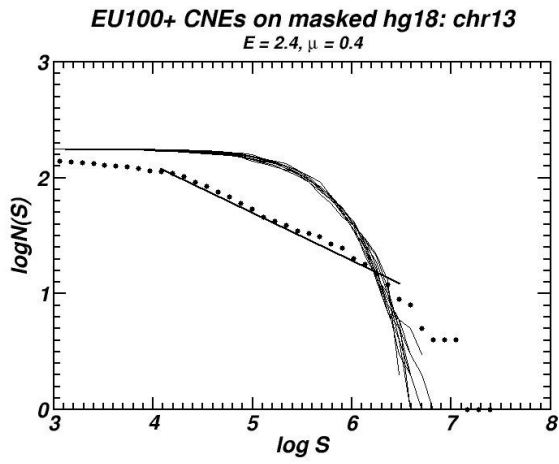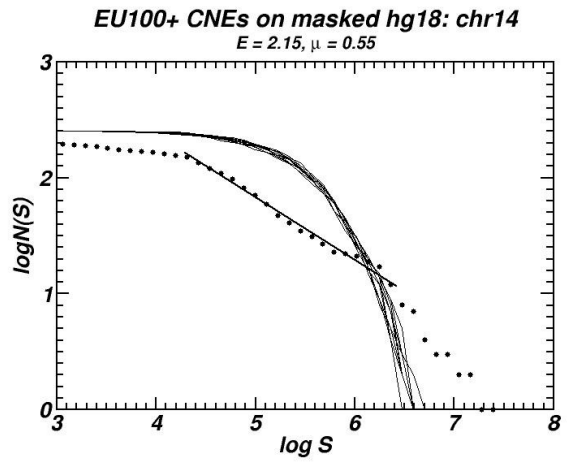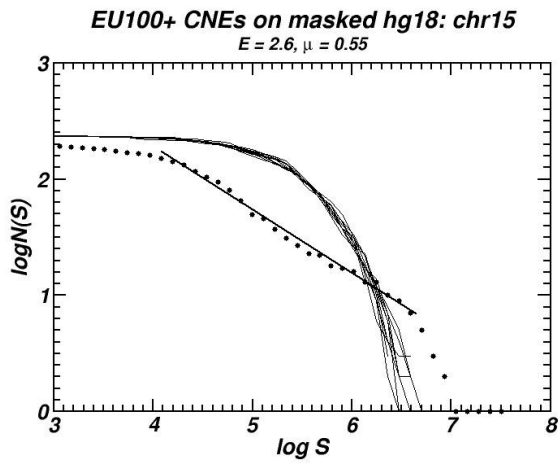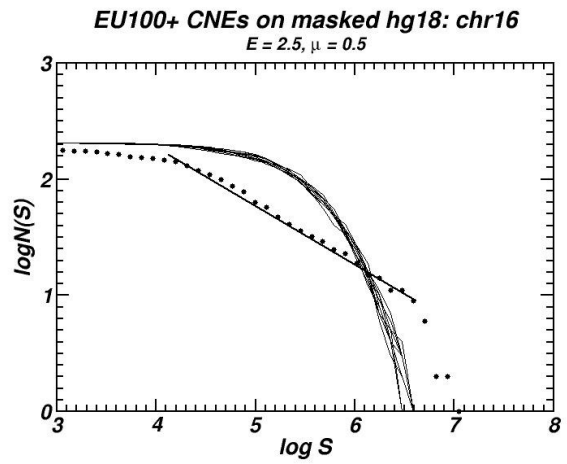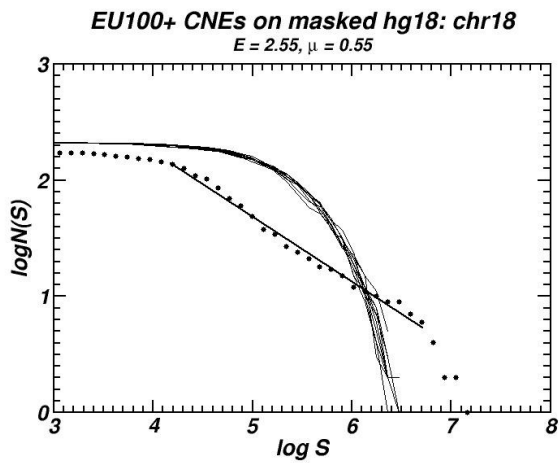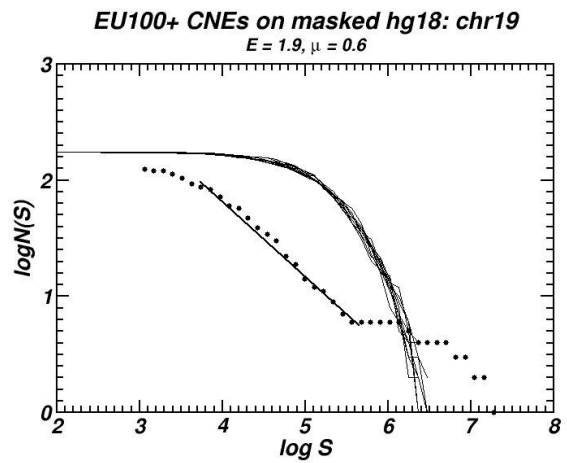

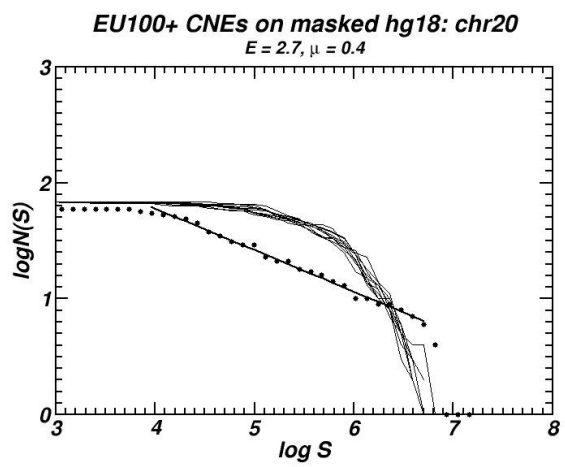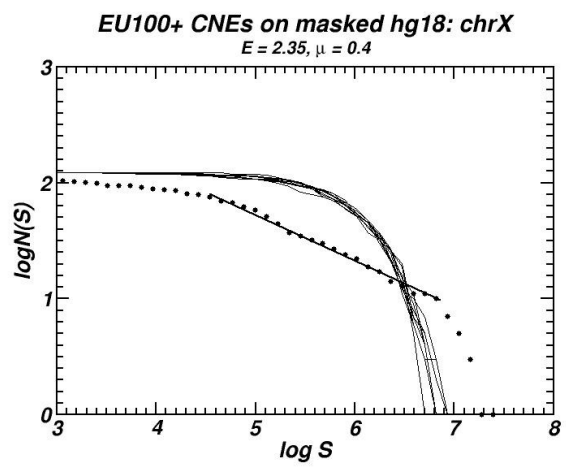

# Worm CNEs (Dataset ix)

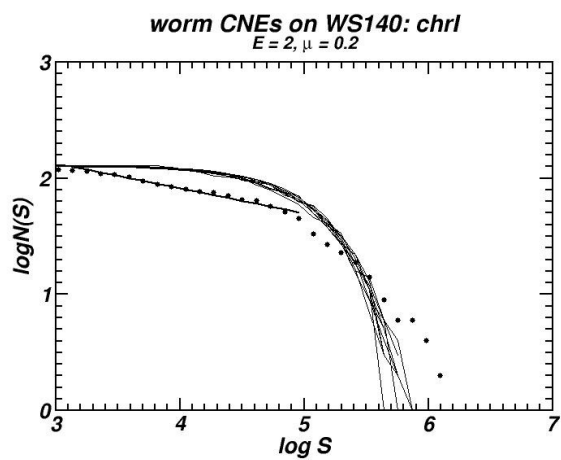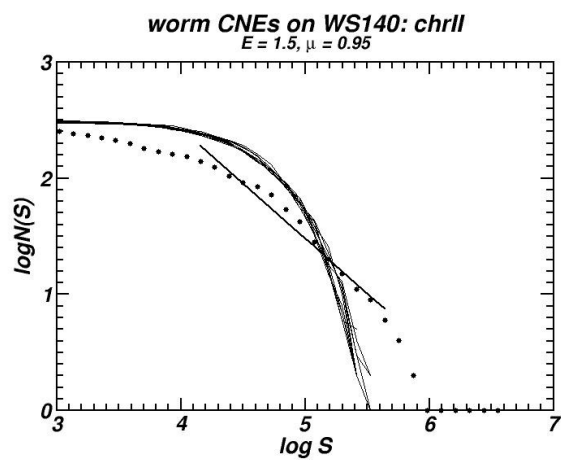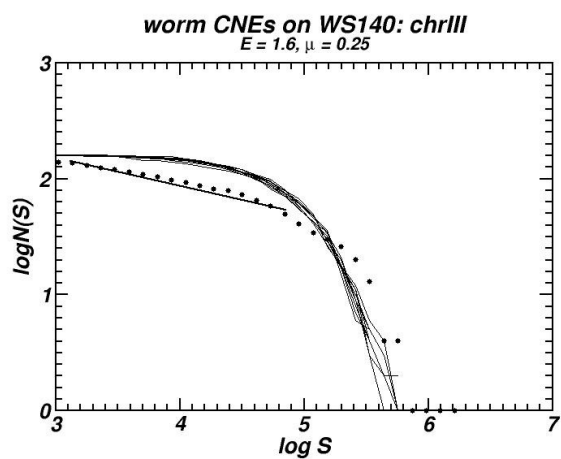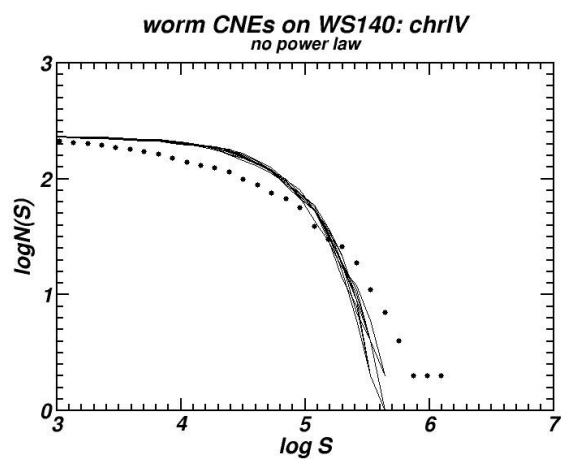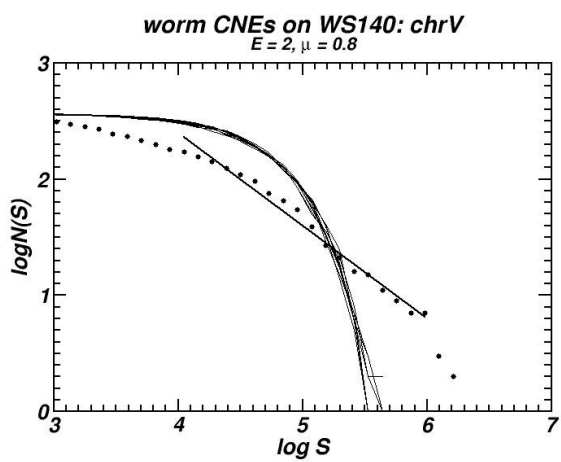

# Human-Zebrafish CNEs (Dataset v)

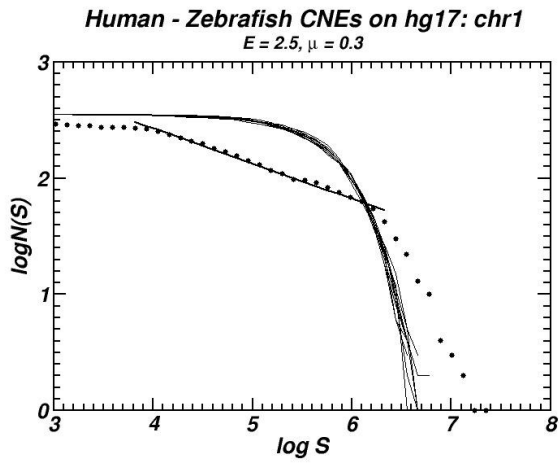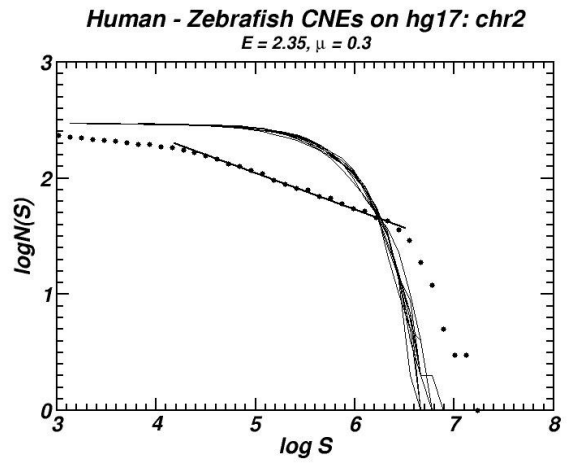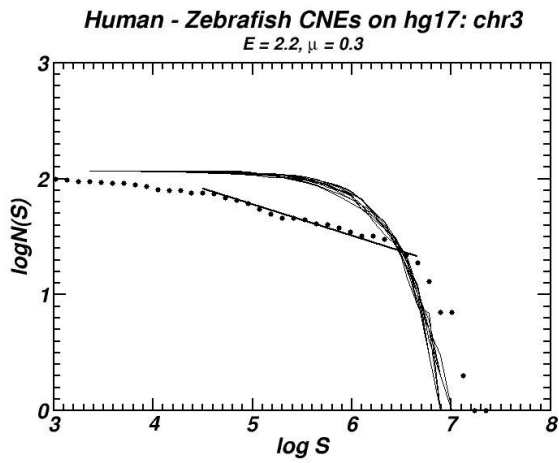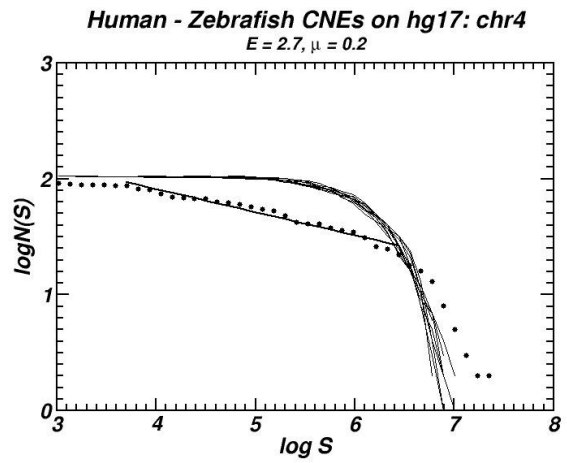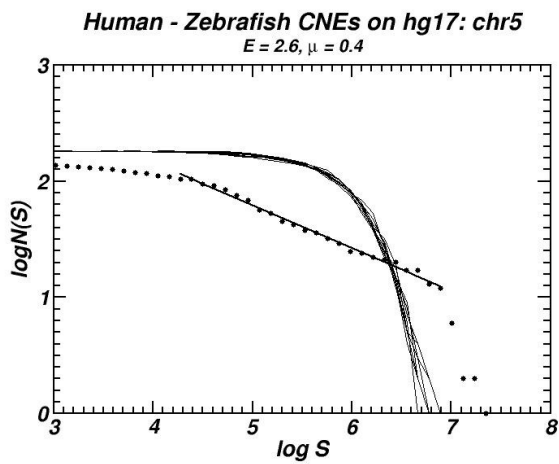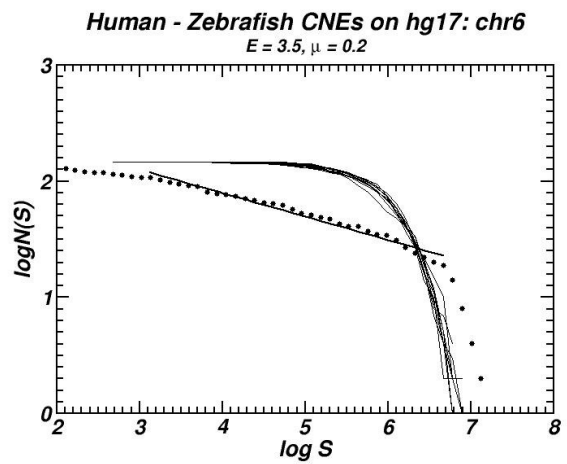

Human - Zebrafish CNEs on hg17: chr7  
 $E = 2.4, \mu = 0.25$

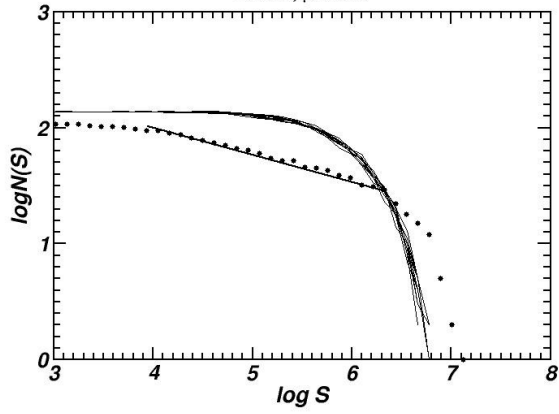

Human - Zebrafish CNEs on hg17: chr8  
 $E = 2.8, \mu = 0.35$

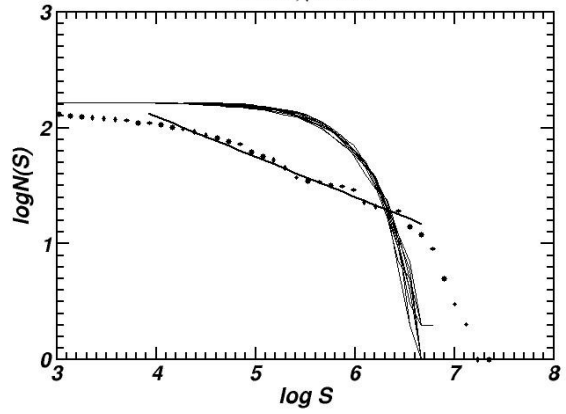

Human - Zebrafish CNEs on hg17: chr9  
 $E = 2, \mu = 0.2$

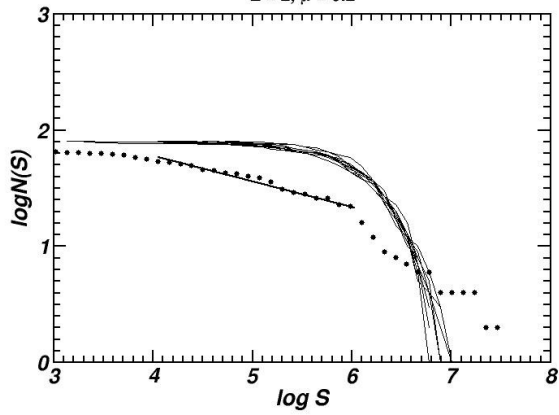

Human - Zebrafish CNEs on hg17: chr10  
 $E = 2.5, \mu = 0.4$

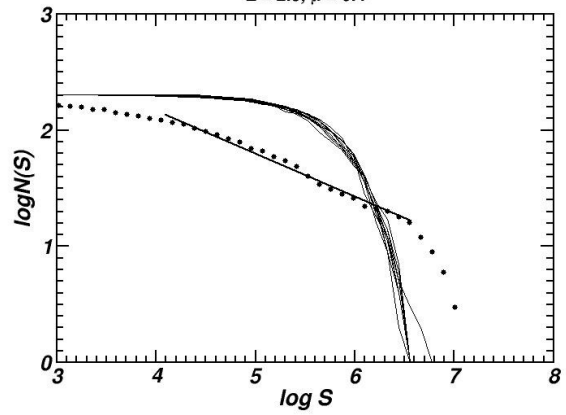

Human - Zebrafish CNEs on hg17: chr11  
 $E = 2.4, \mu = 0.3$

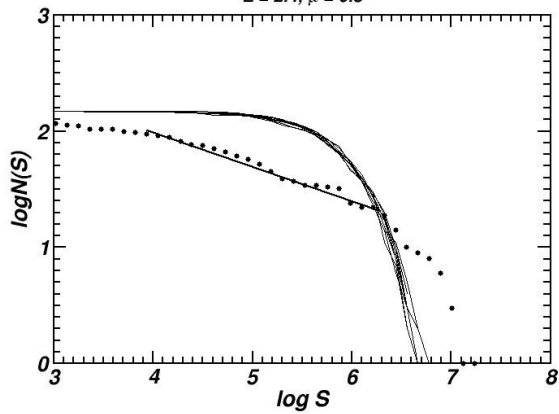

Human - Zebrafish CNEs on hg17: chr12  
 $E = 2.1, \mu = 0.2$

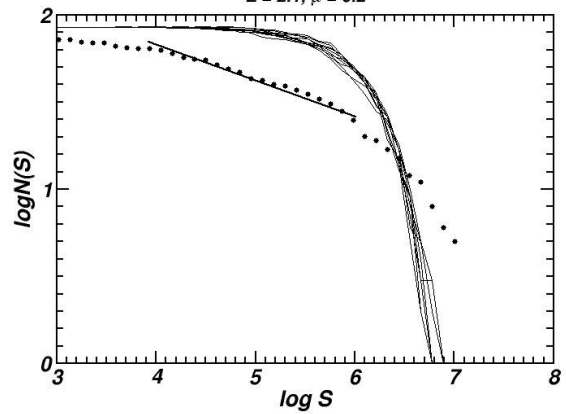

**Human - Zebrafish CNEs on hg17: chr13**  
 $E = 2.4, \mu = 0.25$

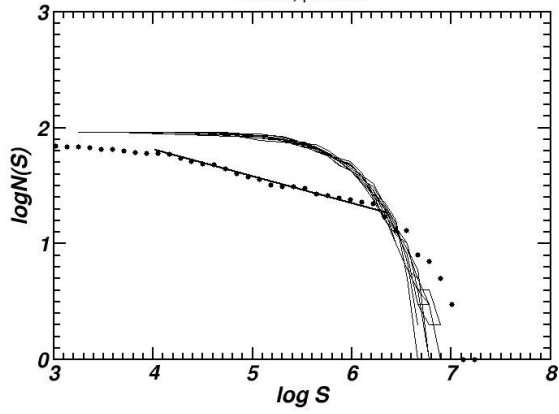

**Human - Zebrafish CNEs on hg17: chr14**  
 $E = 2.6, \mu = 0.5$

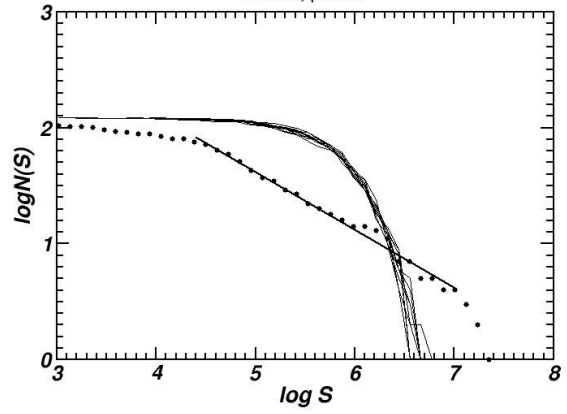

**Human - Zebrafish CNEs on hg17: chr15**  
 $E = 2.1, \mu = 0.45$

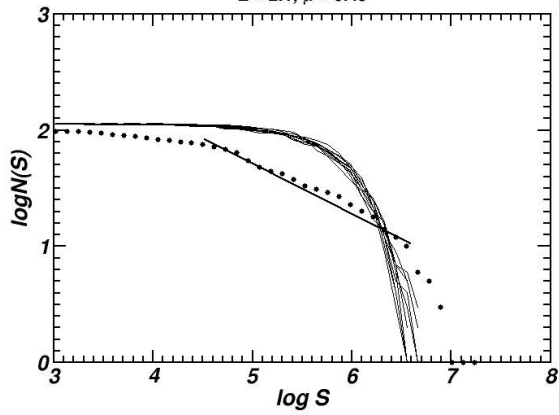

**Human - Zebrafish CNEs on hg17: chr16**  
 $E = 2.1, \mu = 0.3$

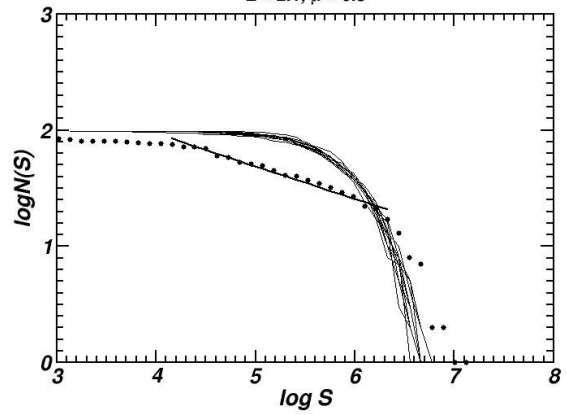

**Human - Zebrafish CNEs on hg17: chr17**  
 $E = 2, \mu = 0.3$

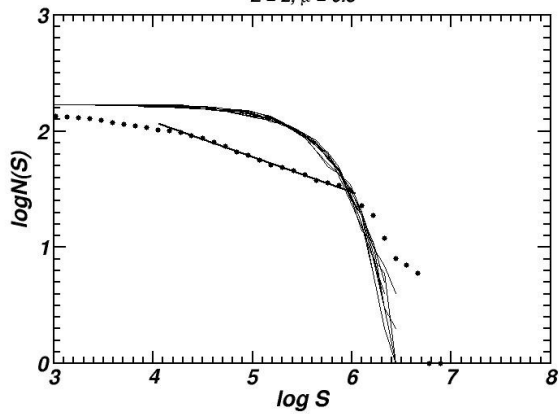

**Human - Zebrafish CNEs on hg17: chr19**  
 $E = 2.2, \mu = 0.35$

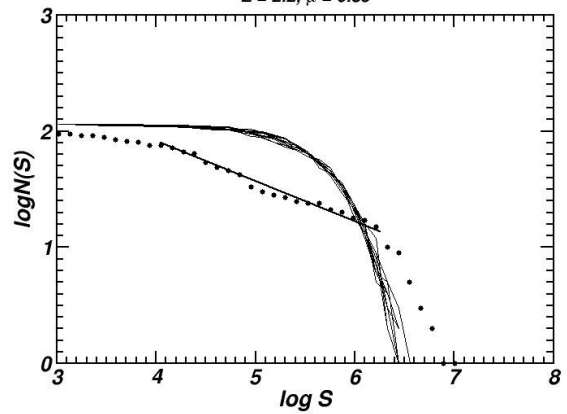

Human - Zebrafish CNEs on hg17: chrX  
 $E = 3.3, \mu = 0.25$

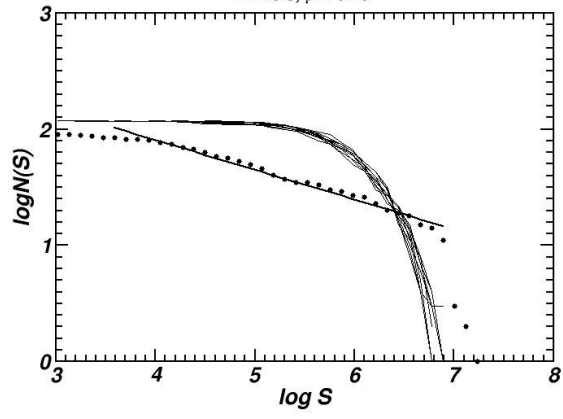

# Human-Zebrafish CNEs on gene-masked genome

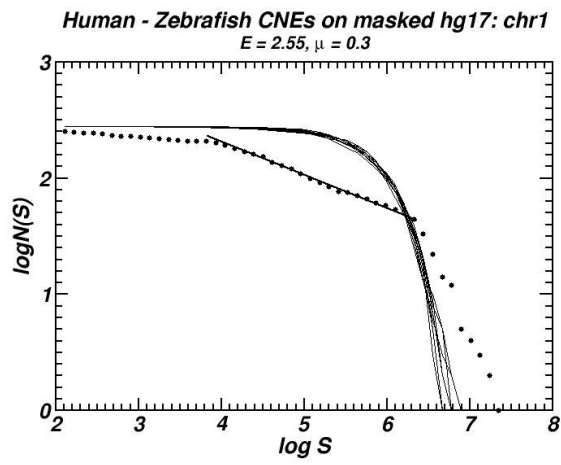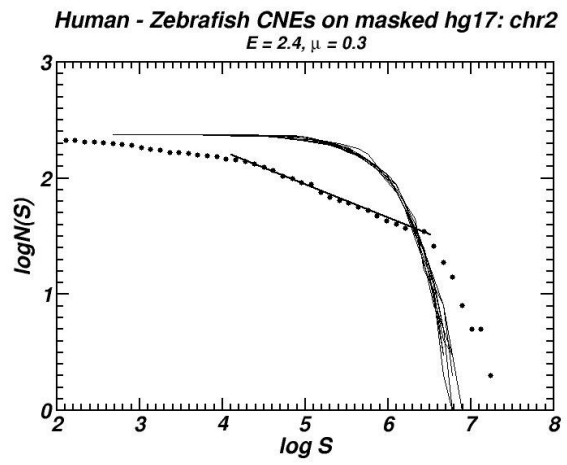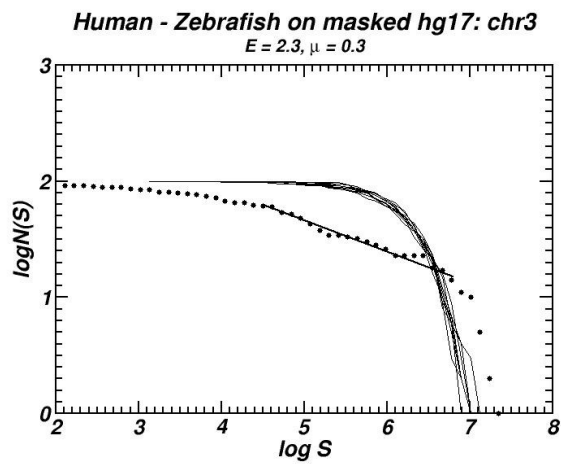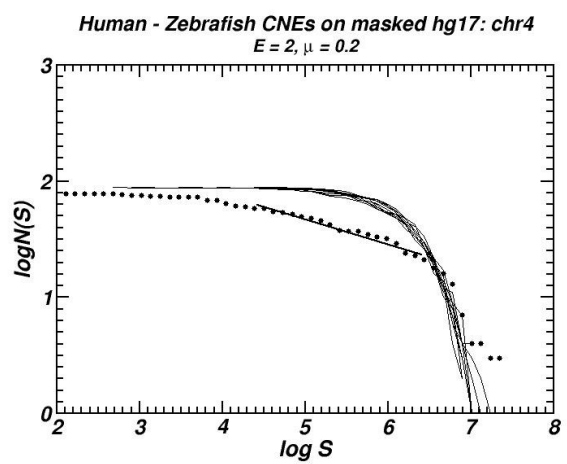



# Human-Fugu CNEs (Dataset iv)

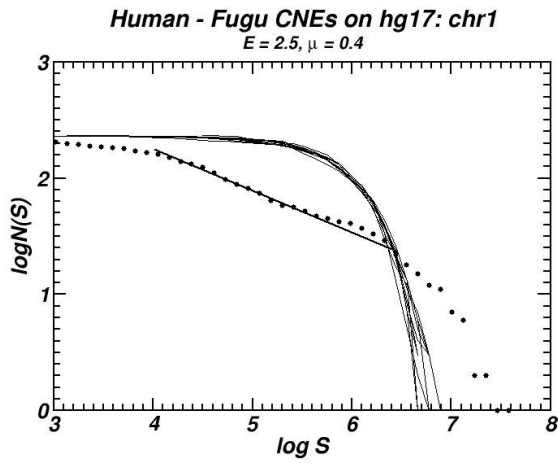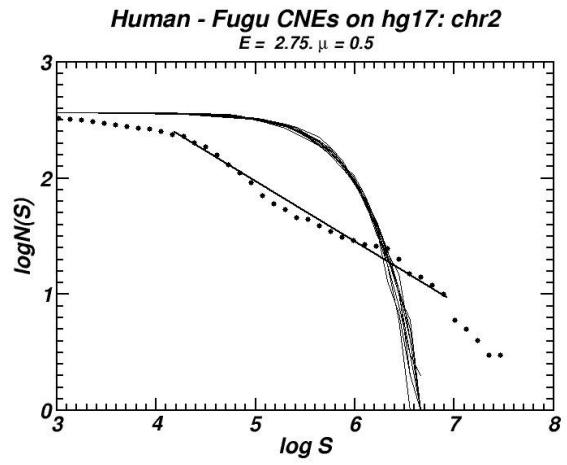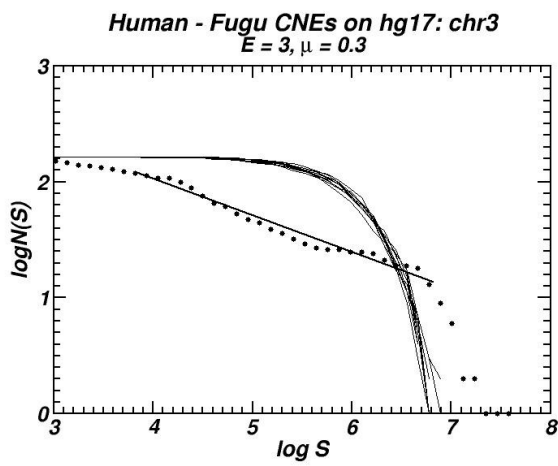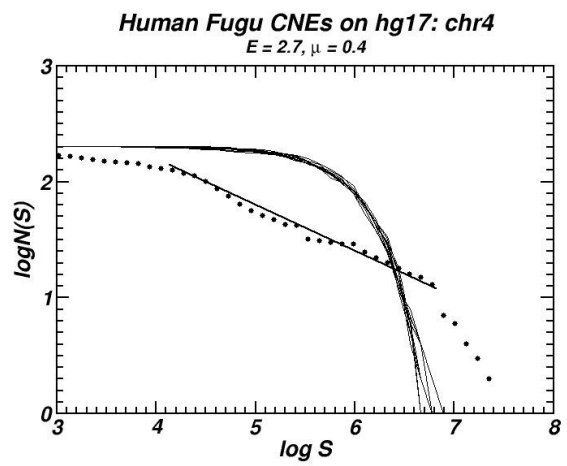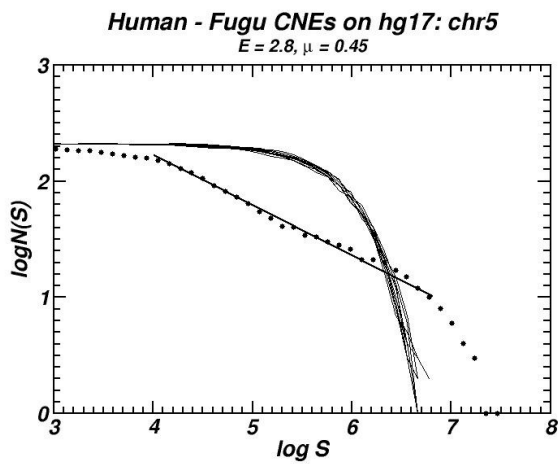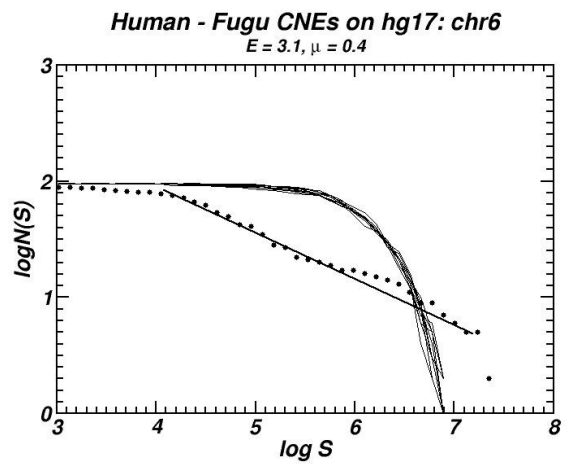

**Human - Fugu CNEs on hg17: chr7**  
 $E = 2.8, \mu = 0.4$

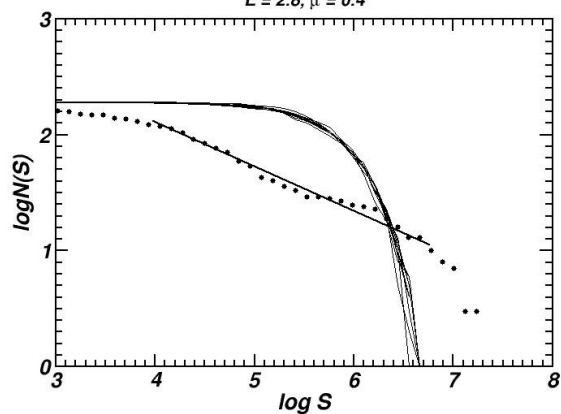

**Human - Fugu CNEs on hg17: chr8**  
no power law

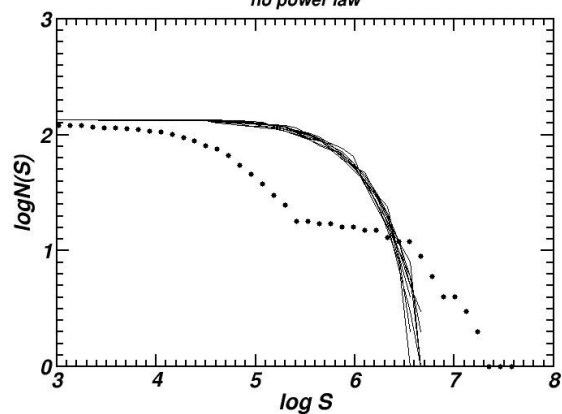

**Human - Fugu CNEs on hg17: chr9**  
 $E = 3.5, \mu = 0.4$

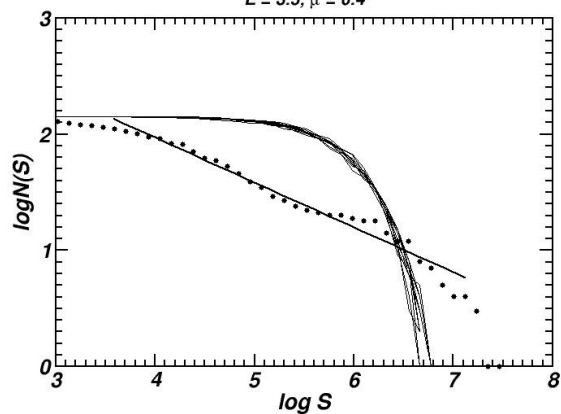

**Human - Fugu CNEs on hg17: chr10**  
 $E = 2.85, \mu = 0.5$

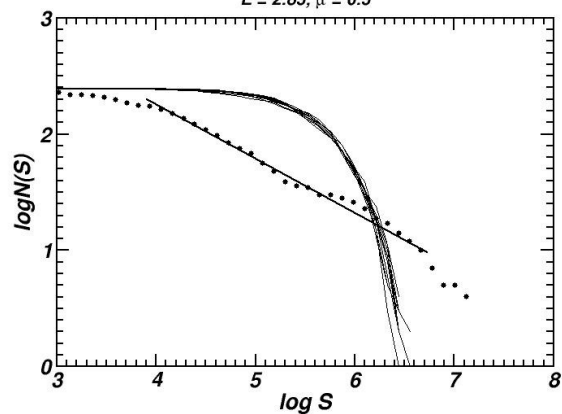

**Human - Fugu CNEs on hg17: chr11**  
 $E = 3.4, \mu = 0.34$

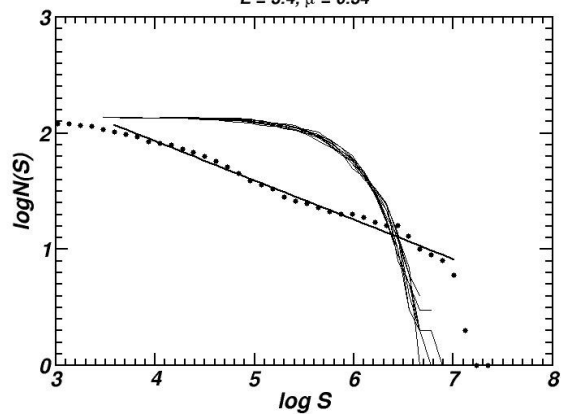

**Human - Fugu CNEs on hg17: chr12**  
 $E = 2.45, \mu = 0.25$

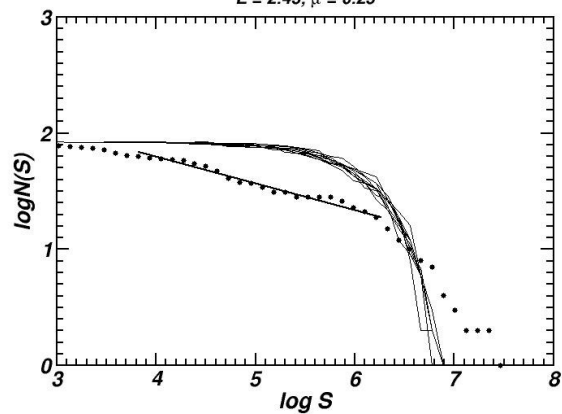

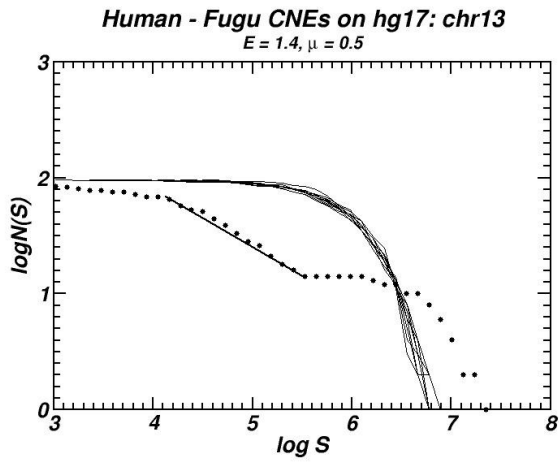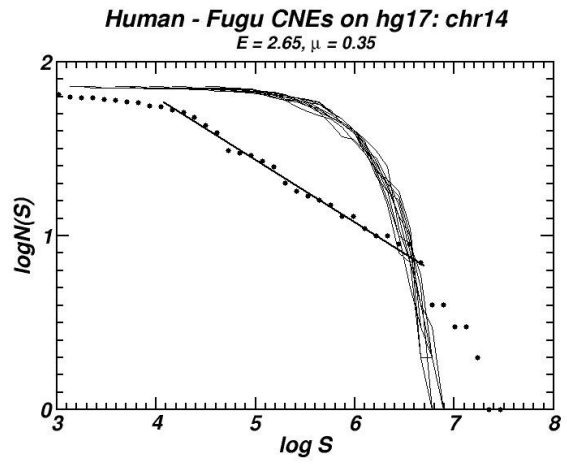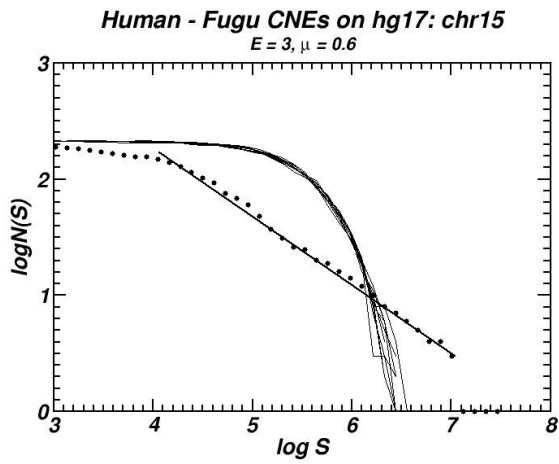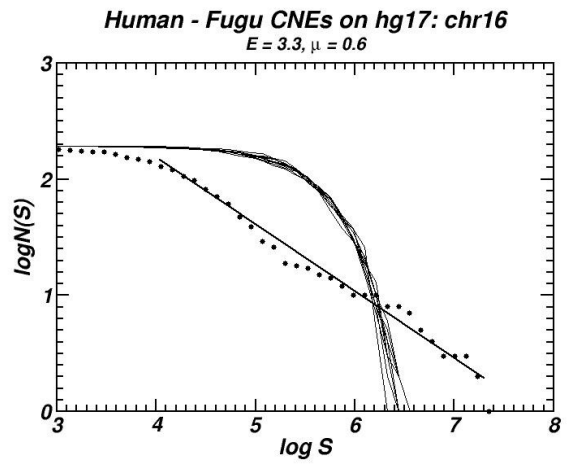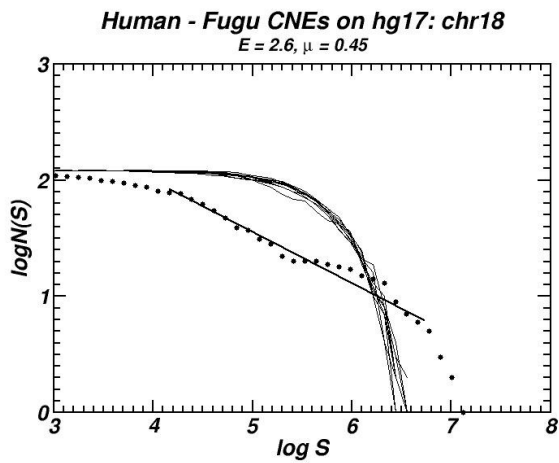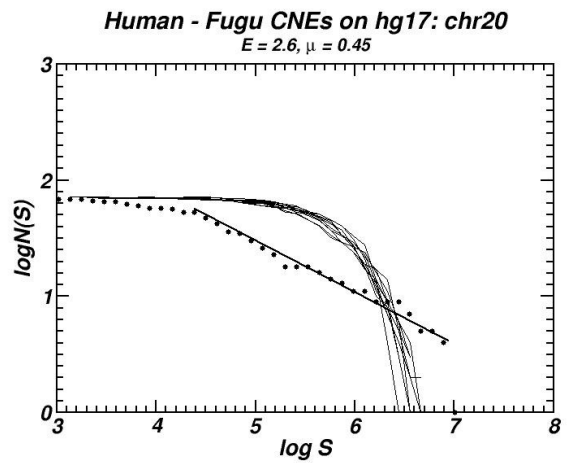

# Human-Elephant Shark CNEs (Dataset vi)

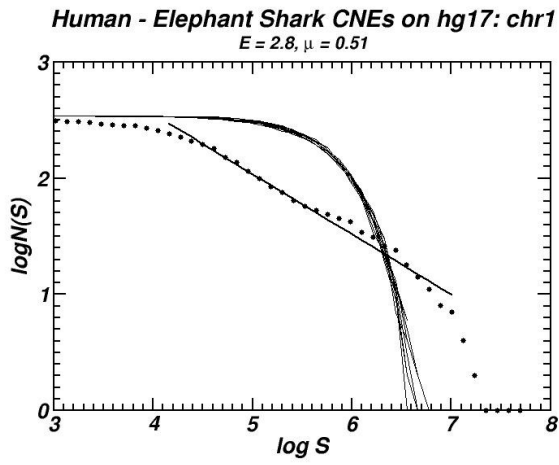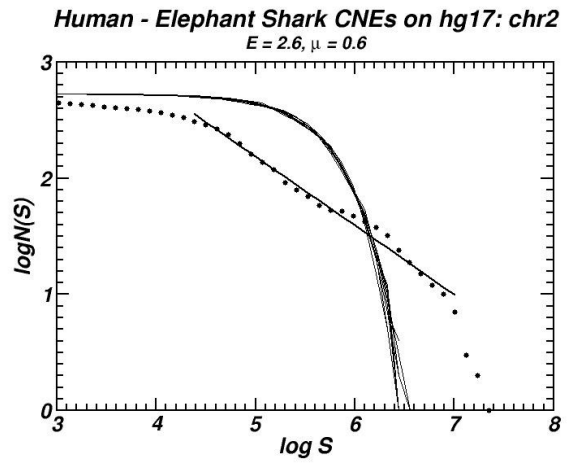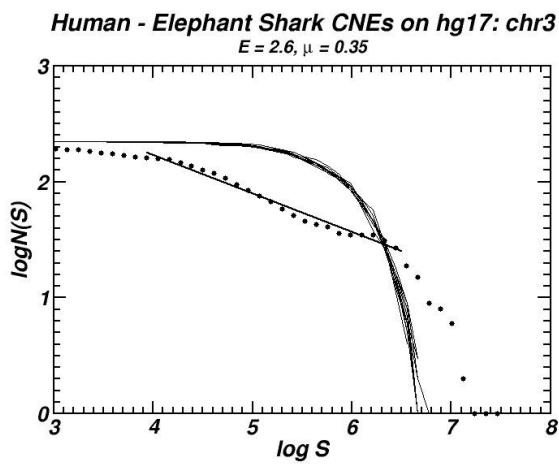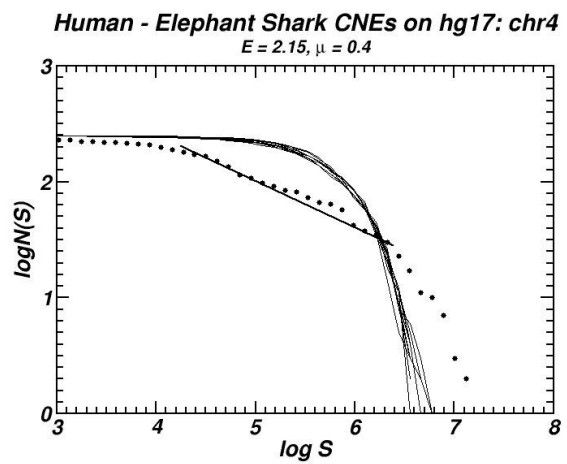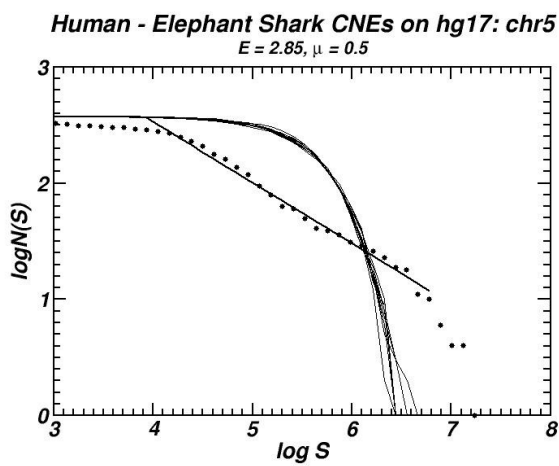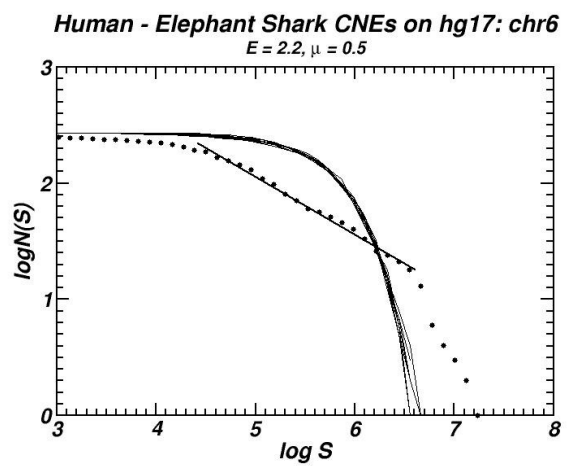

**Human - Elephant Shark CNEs on hg17: chr7**  
 $E = 2.4, \mu = 0.5$

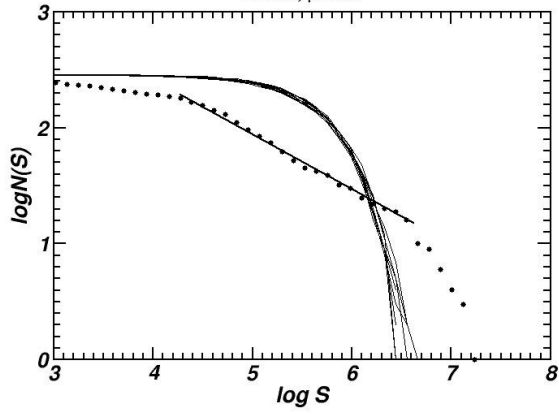

**Human - Elephant Shark CNEs on hg17: chr8**  
 $E = 2.4, \mu = 0.45$

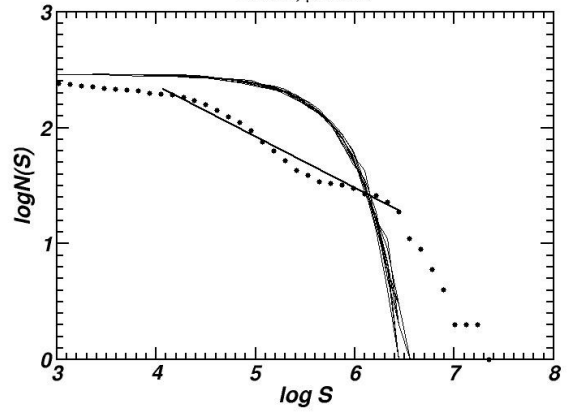

**Human - Elephant Shark CNEs on hg17: chr9**  
 $E = 2, \mu = 0.5$

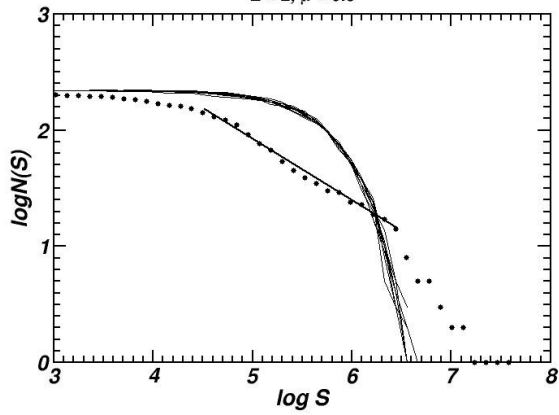

**Human - Elephant Shark CNEs on hg17: chr10**  
 $E = 2.6, \mu = 0.5$

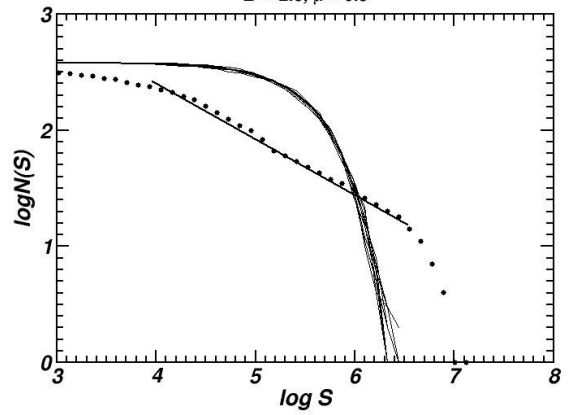

**Human - Elephant Shark CNEs on hg17: chr11**  
 $E = 2.6, \mu = 0.35$

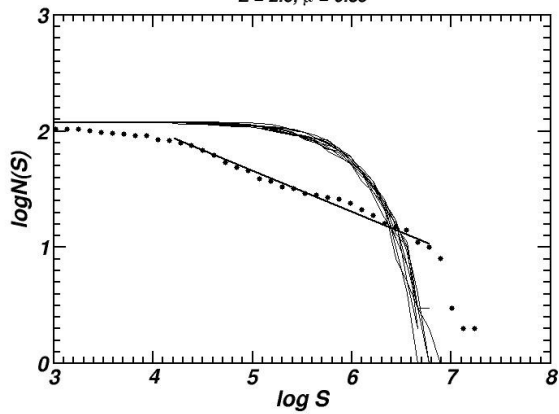

**Human - Elephant Shark CNEs on hg17: chr12**  
 $E = 2.2, \mu = 0.35$

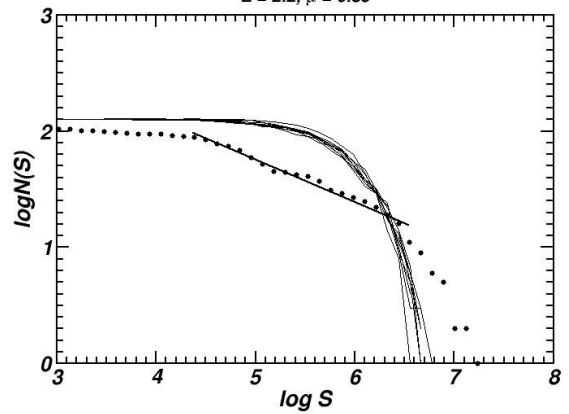

**Human - Elephant Shark CNEs on hg17: chr13**  
 $E = 2.1, \mu = 0.45$

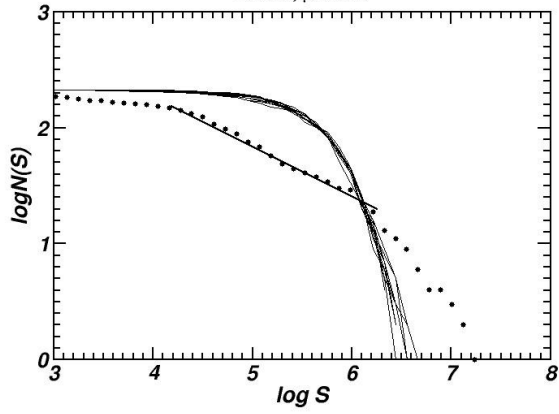

**Human - Elephant Shark CNEs on hg17: chr14**  
 $E = 2.5, \mu = 0.5$

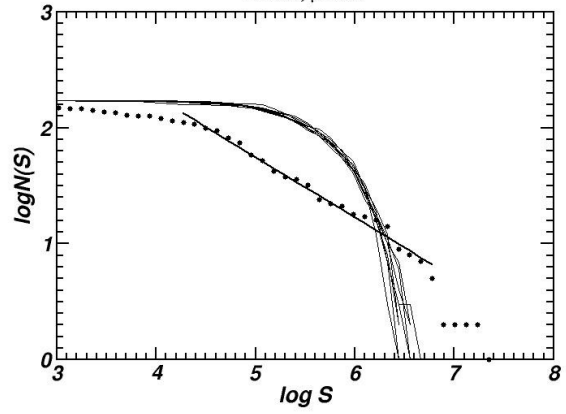

**Human - Elephant Shark CNEs on hg17: chr15**  
 $E = 2.2, \mu = 0.6$

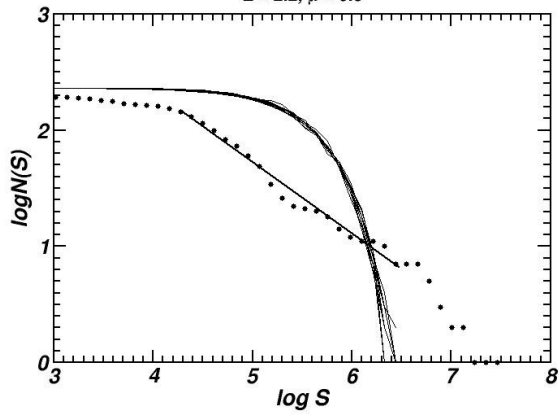

**Human - Elephant Shark CNEs on hg17: chr16**  
 $E = 2.1, \mu = 0.7$

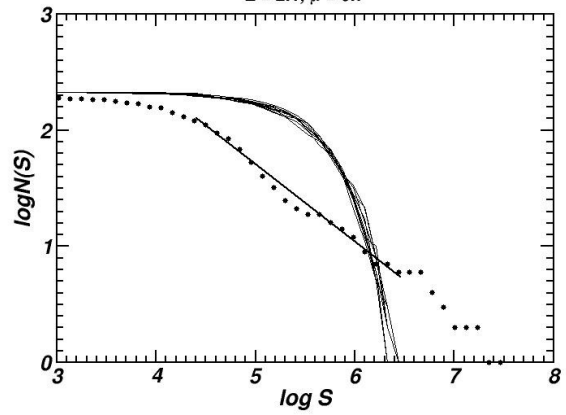

**Human - Elephant Shark CNEs on hg17: chr17**  
 $E = 2.3, \mu = 0.25$

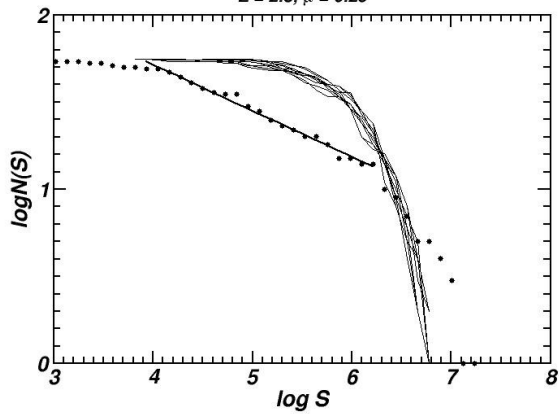

**Human - Elephant Shark CNEs on hg17: chr18**  
 $E = 2.5, \mu = 0.4$

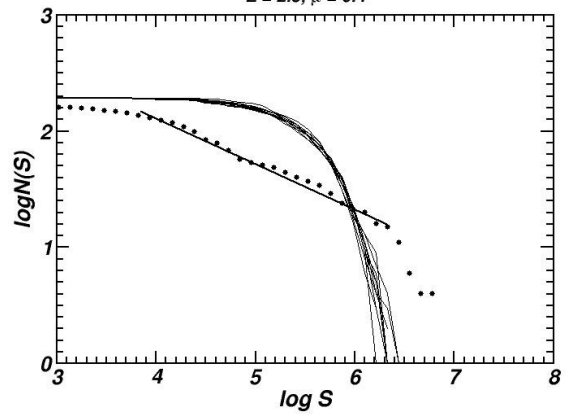

Human - Elephant Shark CNEs on hg17: chr19  
no power law

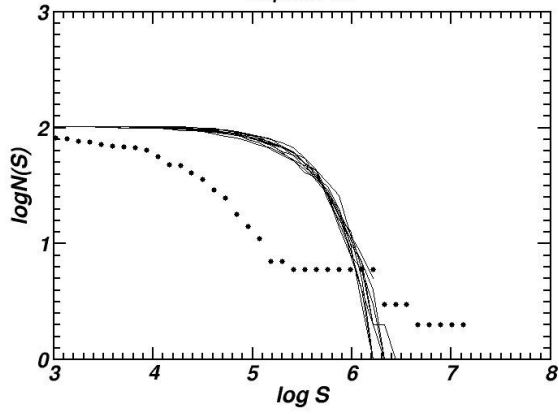

Human - Elephant Shark CNEs on hg17: chr20  
 $E = 2.2, \mu = 0.4$

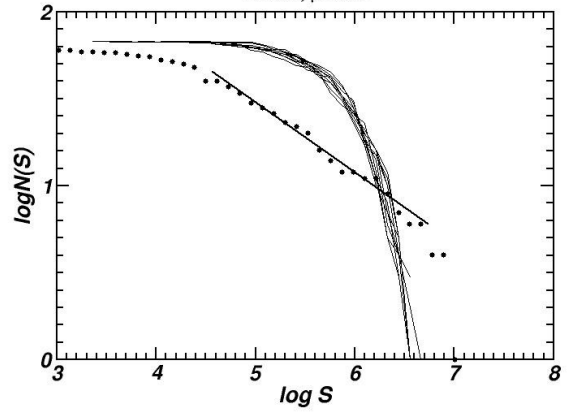

Human - Elephant Shark CNEs on hg17: chrX  
 $E = 2, \mu = 0.35$

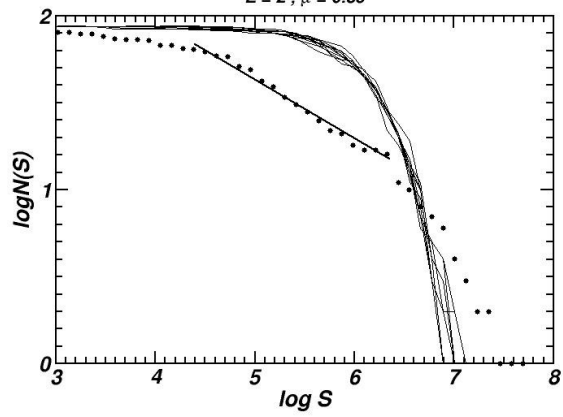

# Human-Elephant Shark CNEs on gene-masked genome

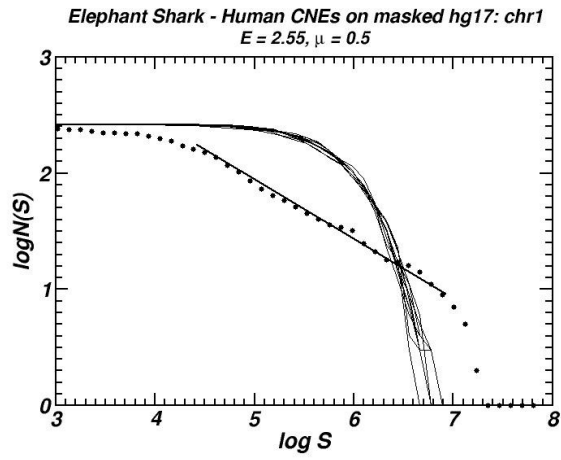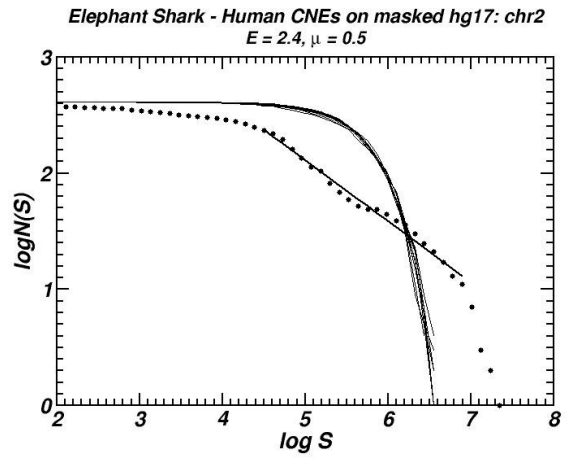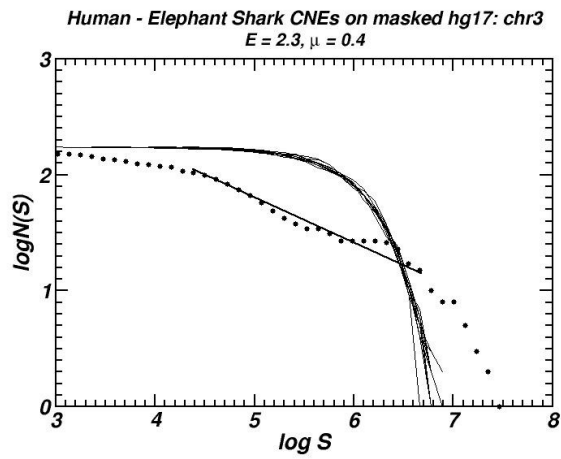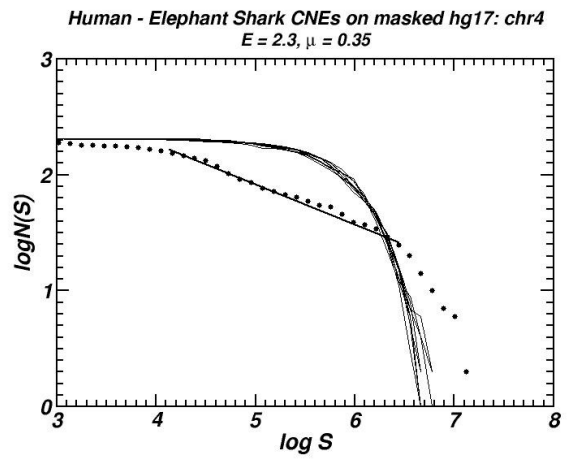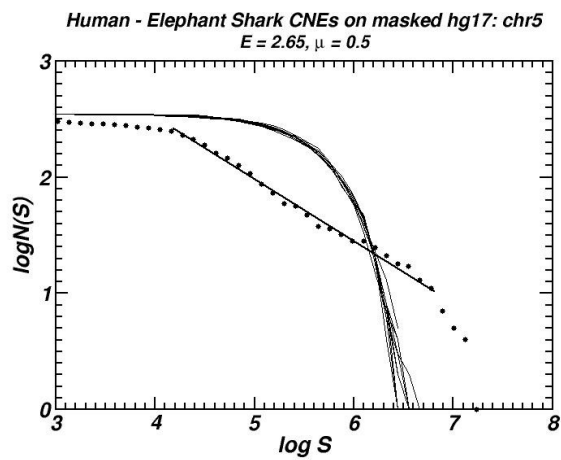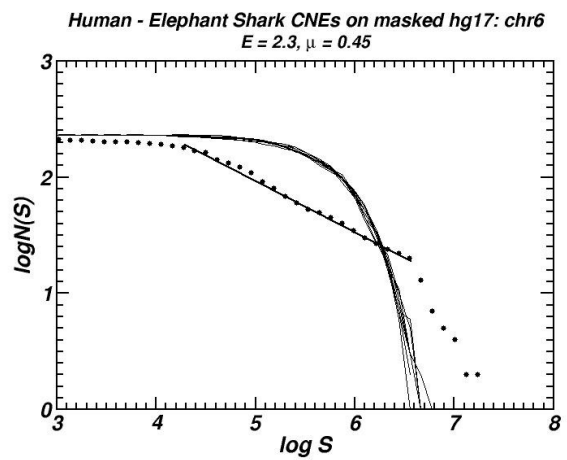



Human - Elephant Shark CNEs on masked hg17: chr7  
 $E = 2.4, \mu = 0.4$

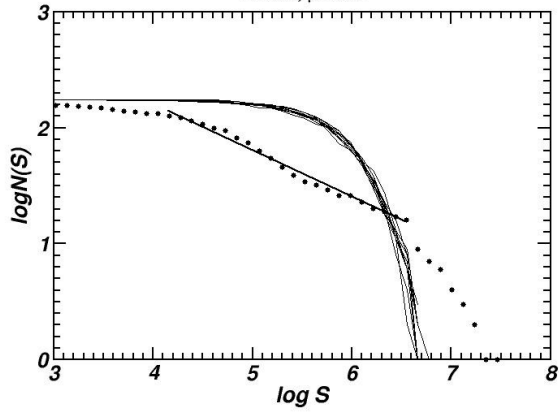

Human - Elephant Shark CNEs on masked hg17: chr8  
 $E = 2.3, \mu = 0.45$

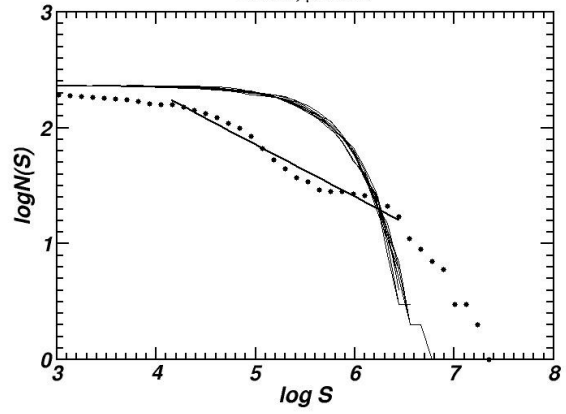

Human - Elephant Shark CNEs on masked hg17: chr9  
 $E = 2.2, \mu = 0.45$

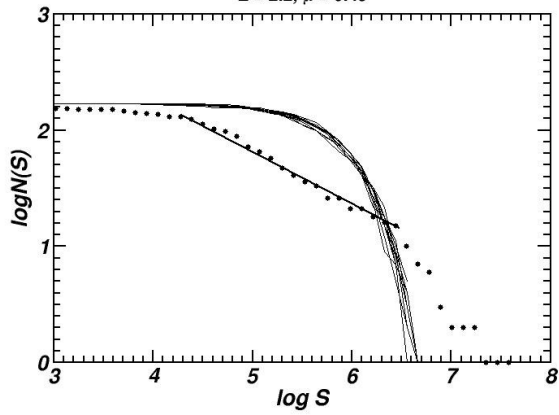

Human - Elephant Shark CNEs on masked hg17: chr10  
 $E = 2.7, \mu = 0.4$

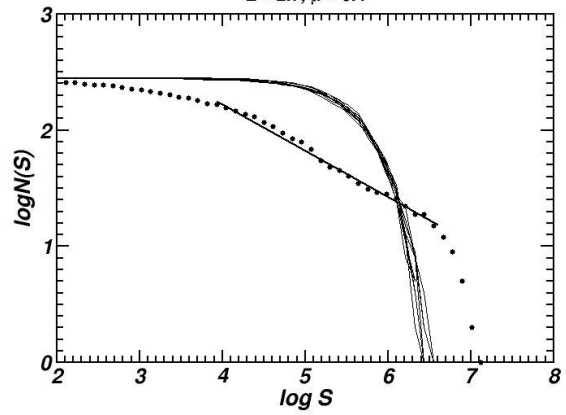

Human - Elephant Shark CNEs on masked hg17: chr11  
 $E = 2.75, \mu = 0.4$

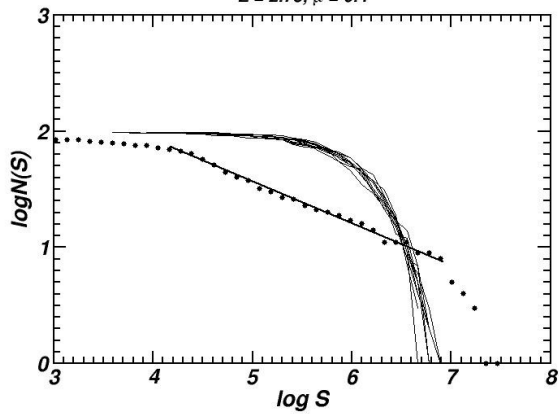

Human - Elephant Shark CNEs on masked hg17: chr12  
 $E = 2.15, \mu = 0.4$

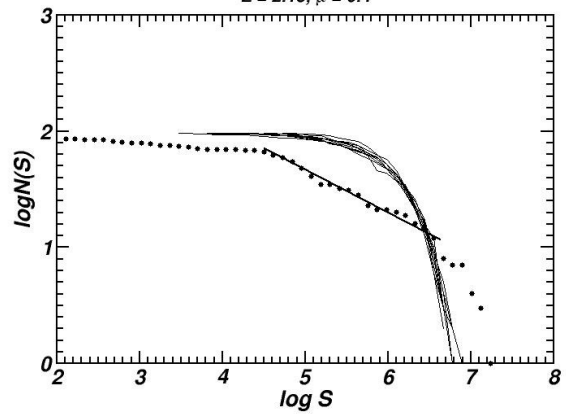

Human - Elephant Shark CNEs on masked hg17: chr13  
 $E = 2.5, \mu = 0.46$

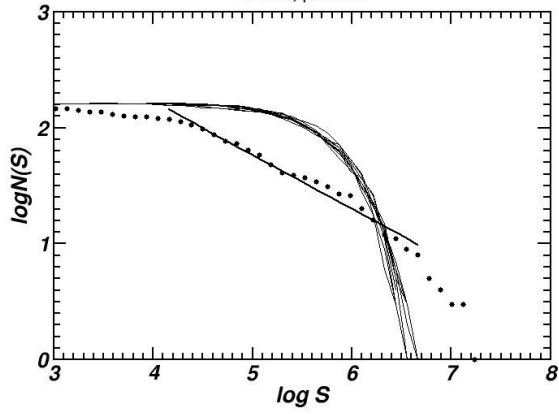

Human - Elephant Shark CNEs on masked hg17: chr14  
 $E = 2.25, \mu = 0.45$

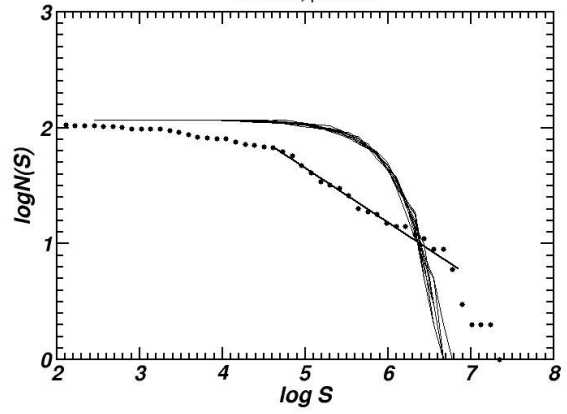

Human - Elephant Shark CNEs on masked hg17: chr 15  
 $E = 2.6, \mu = 0.55$

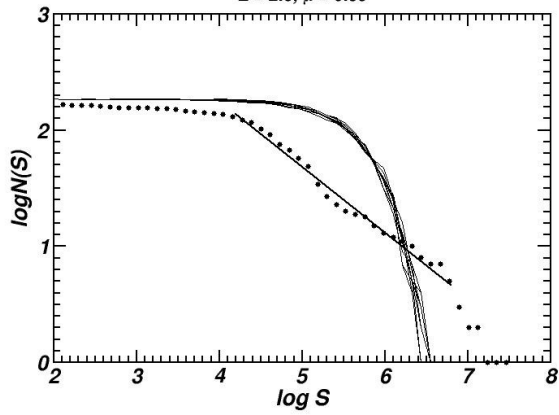

Human - Elephant Shark CNEs on masked hg17: chr16  
 $E = 2.2, \mu = 0.6$

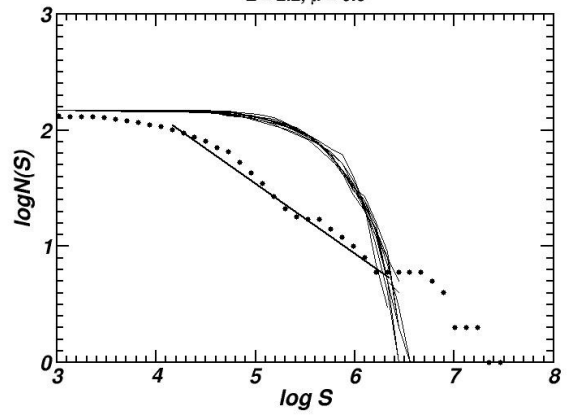

Human - Elephant Shark CNEs on masked hg17: chr18  
 $E = 2.7, \mu = 0.35$

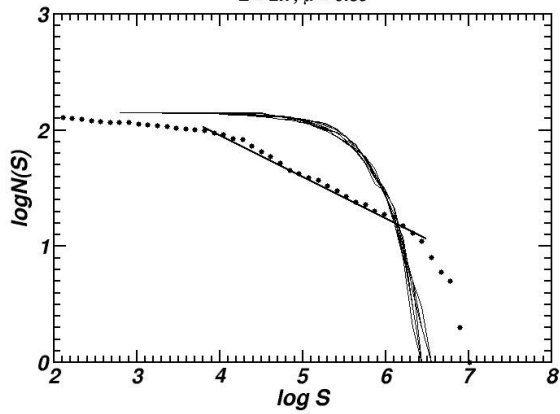

# Human-Chicken UCNEs (Dataset iii)

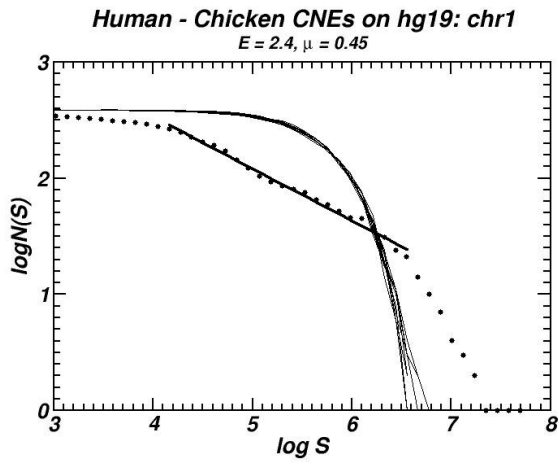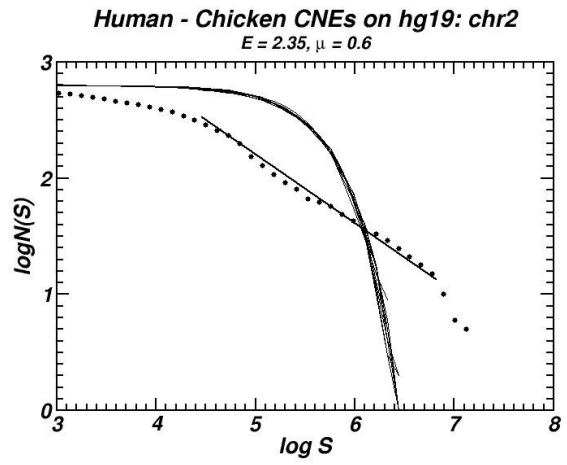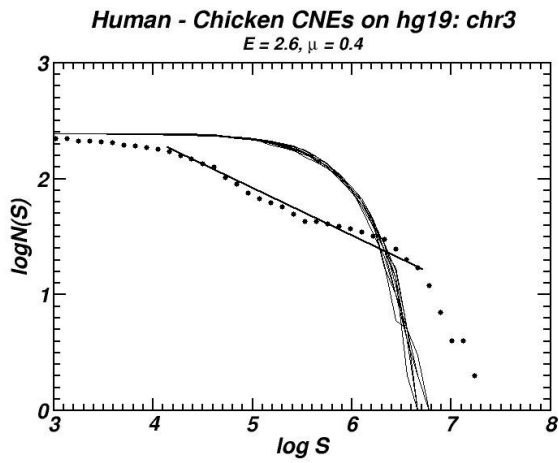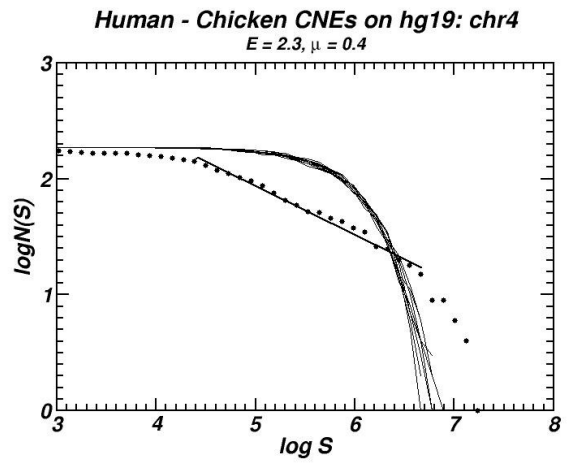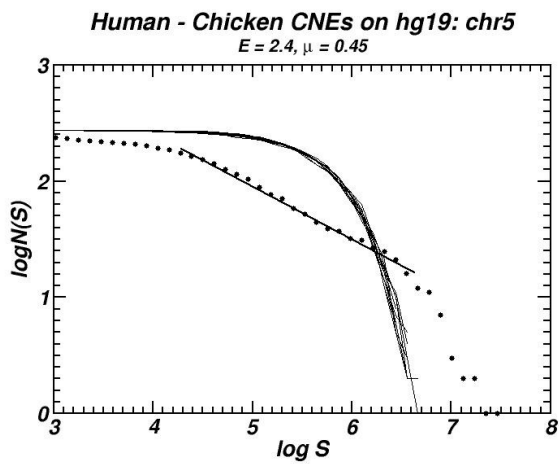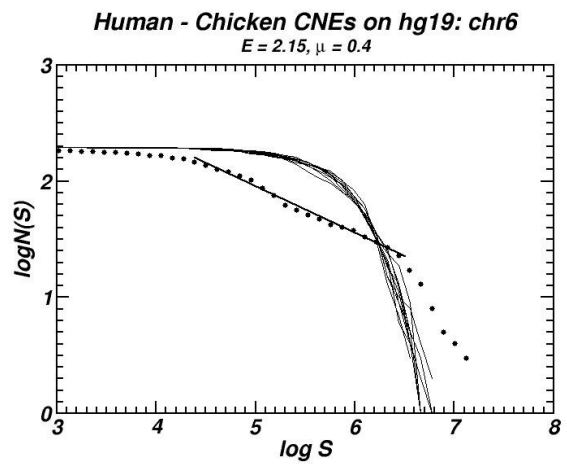

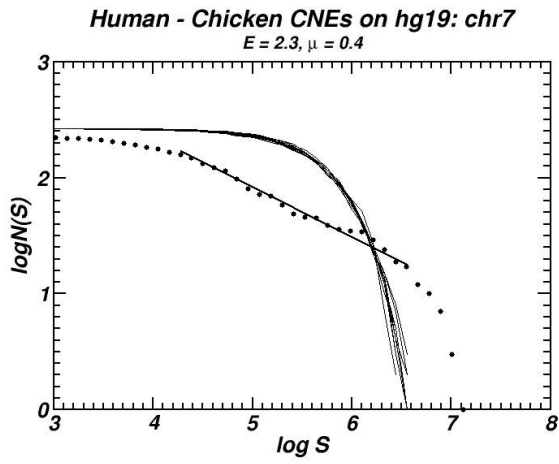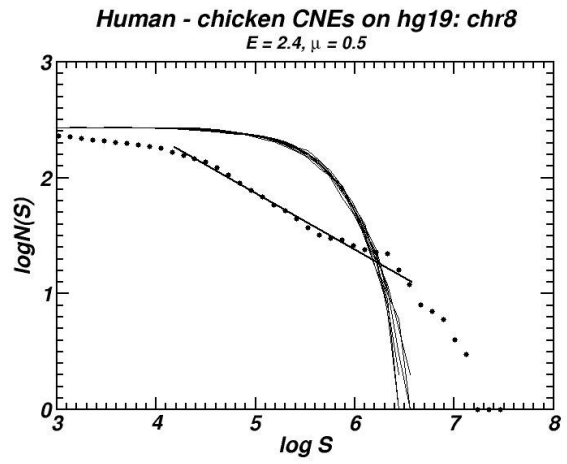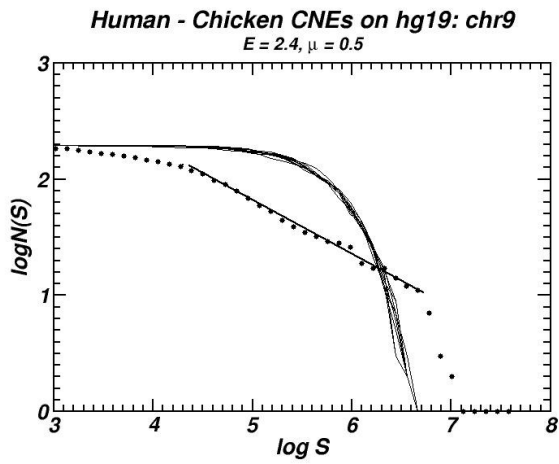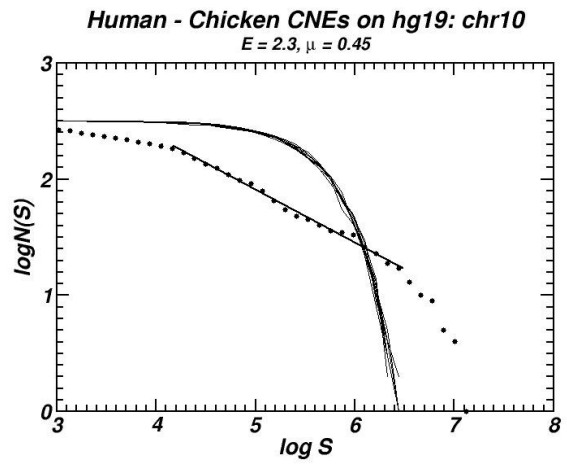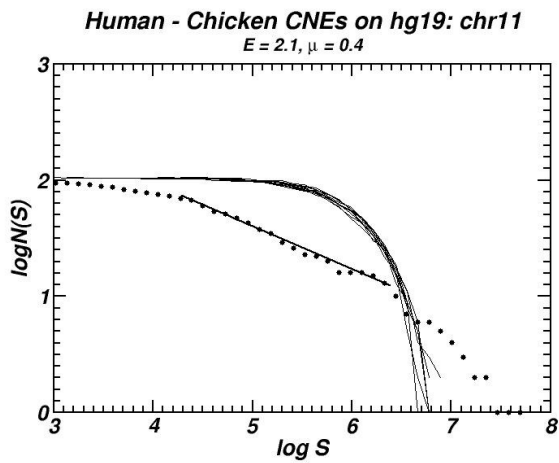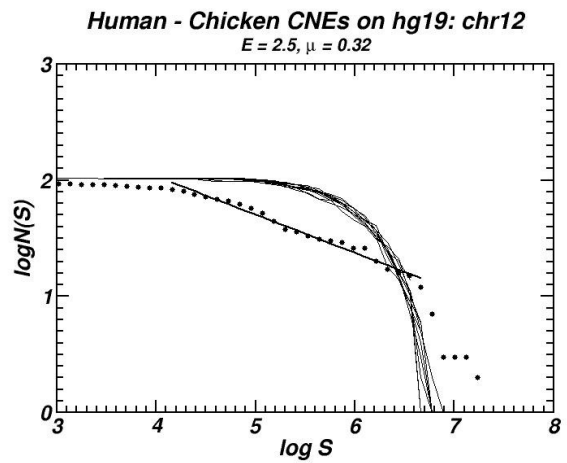

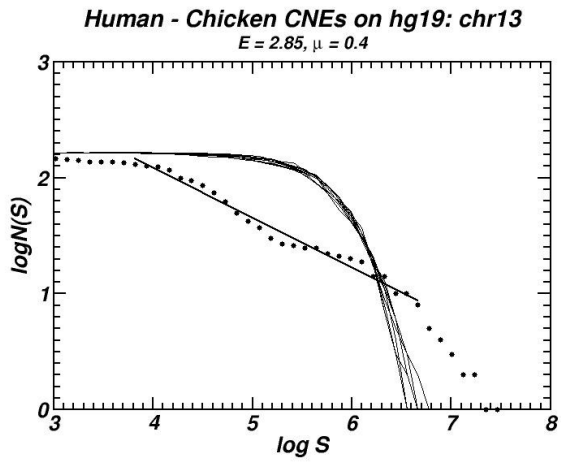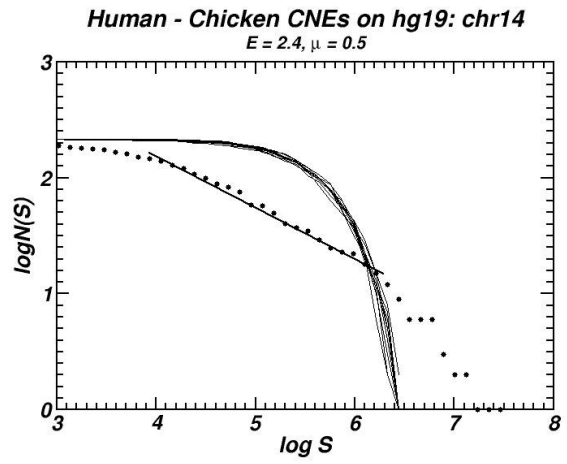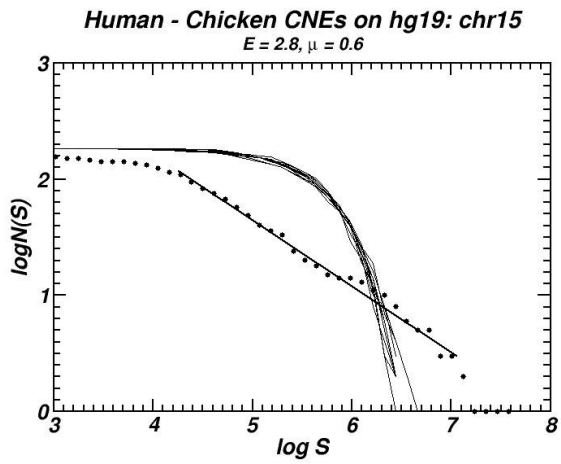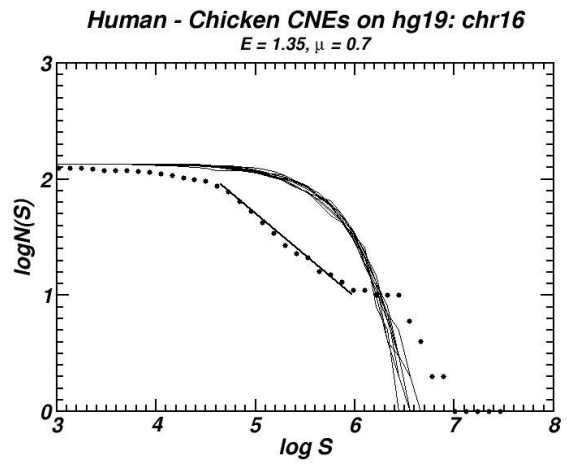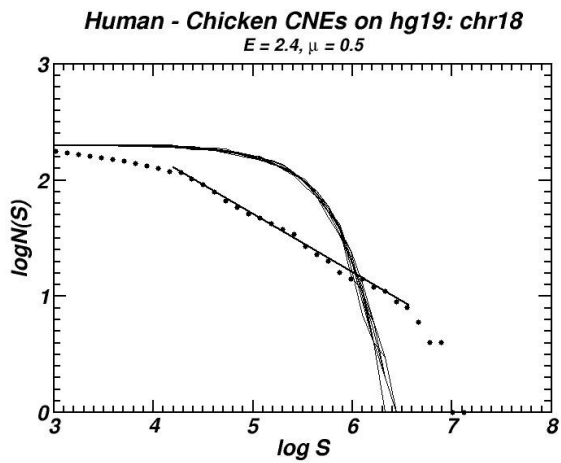

# Insect CNEs (Dataset viii)

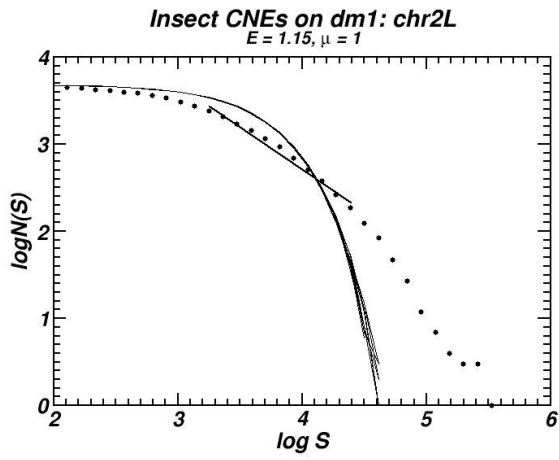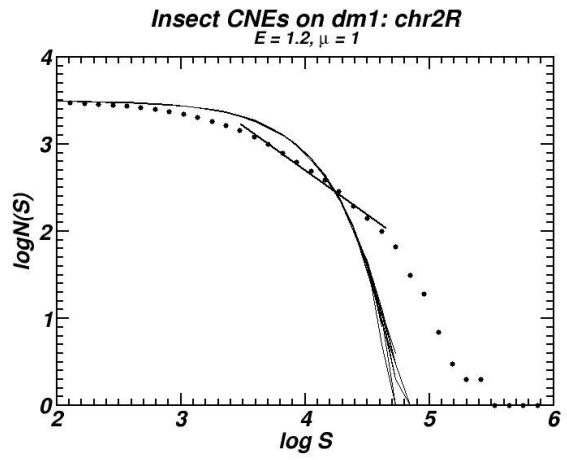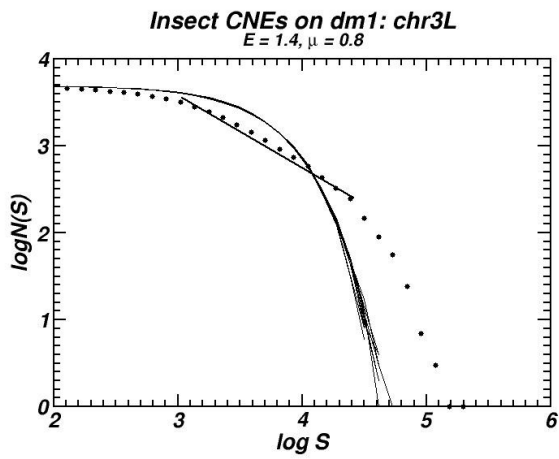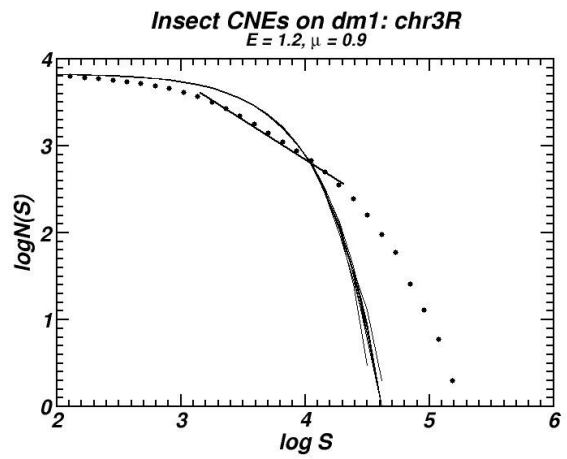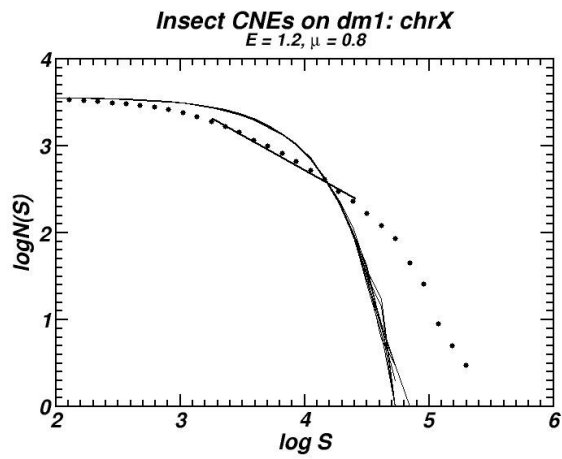

# Insect CNEs on gene-masked genome

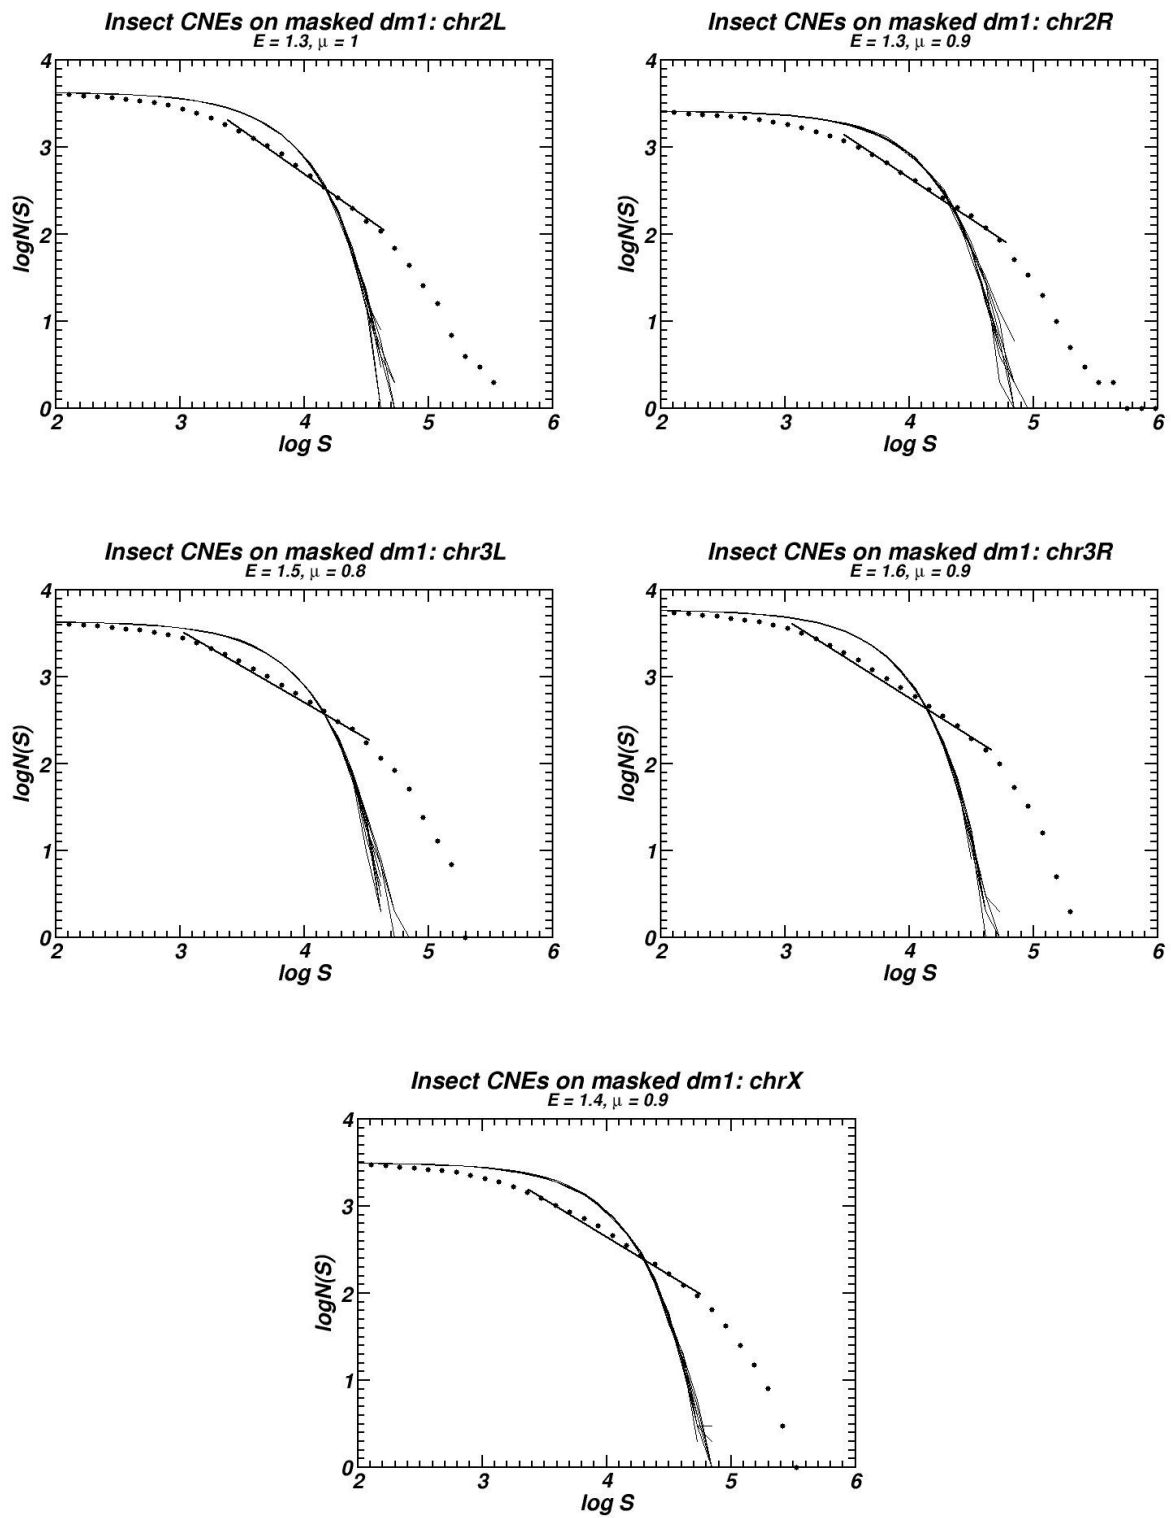

# *D. rerio* PCNEs (Dataset vii)

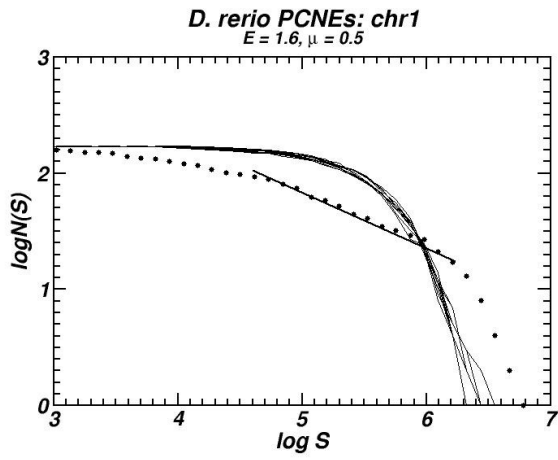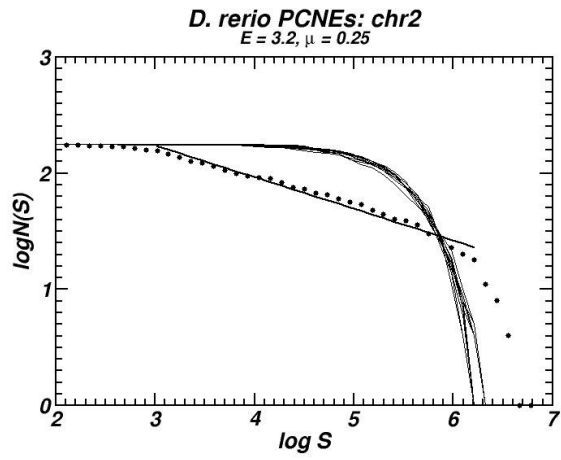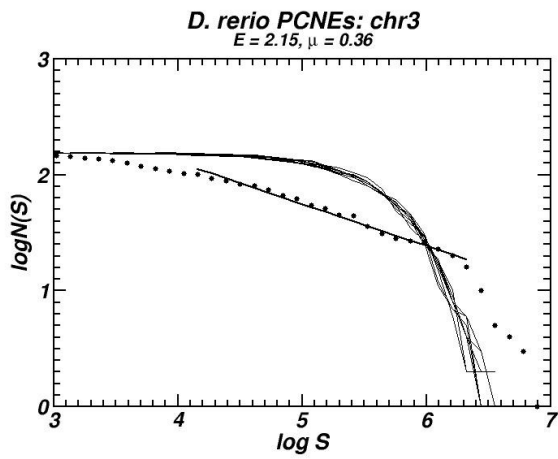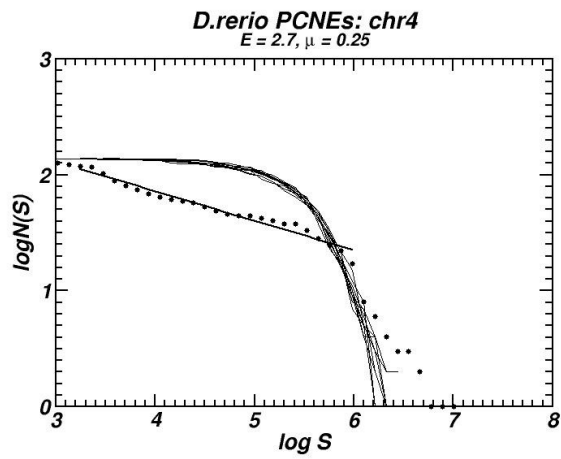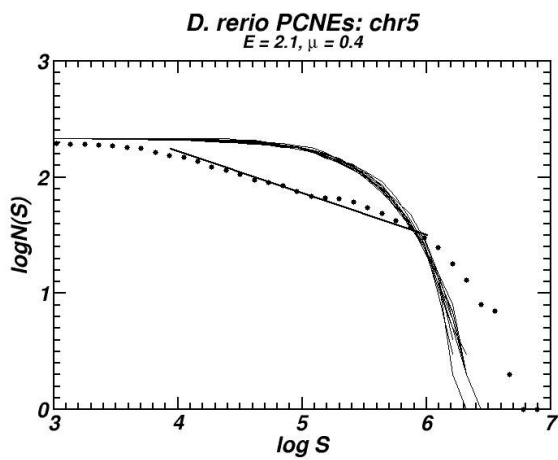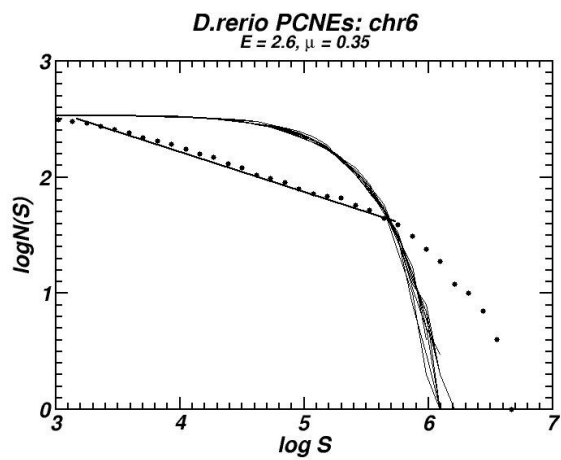



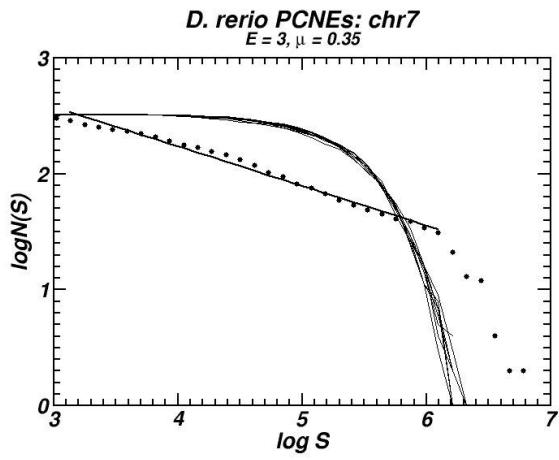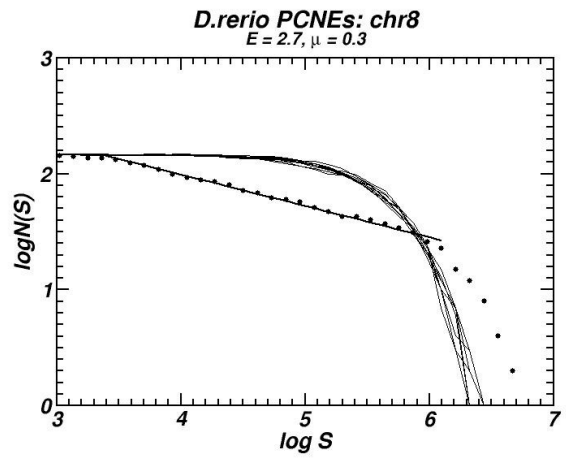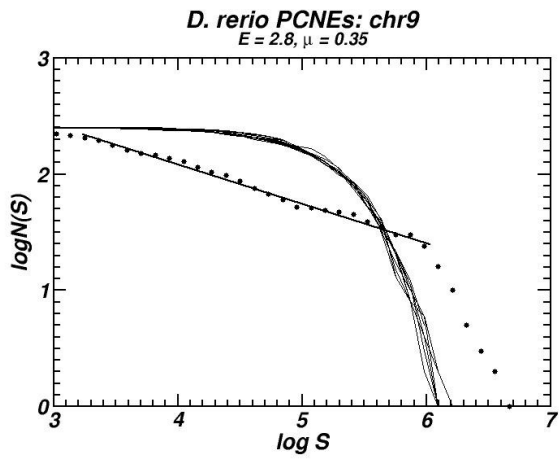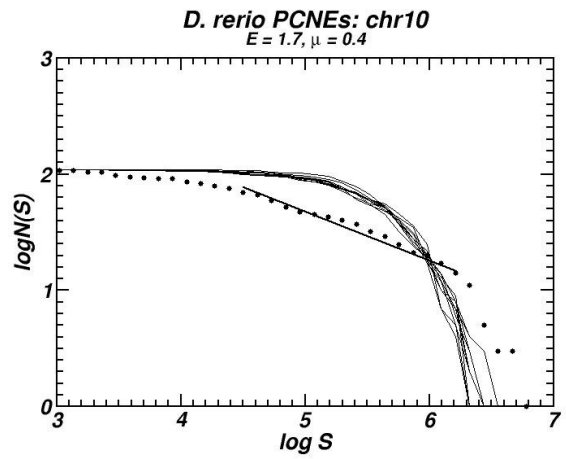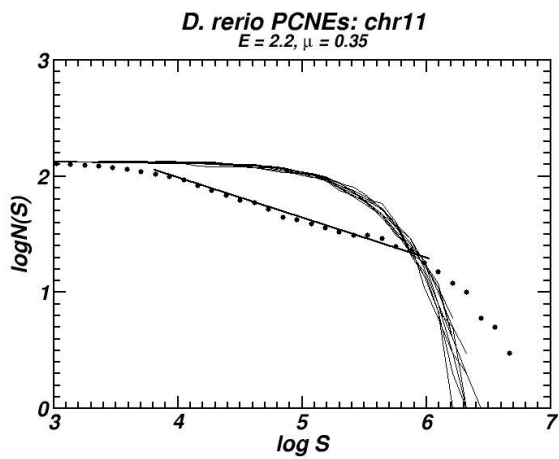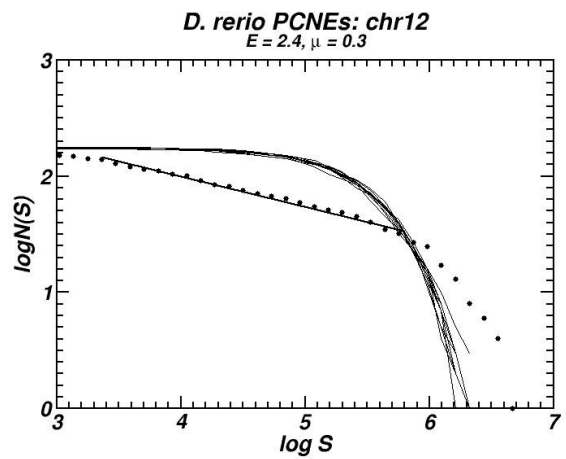

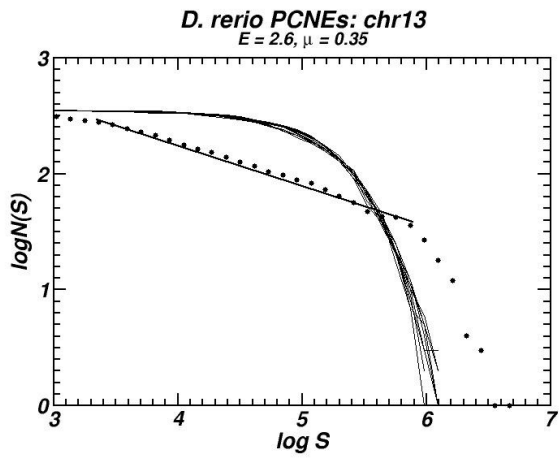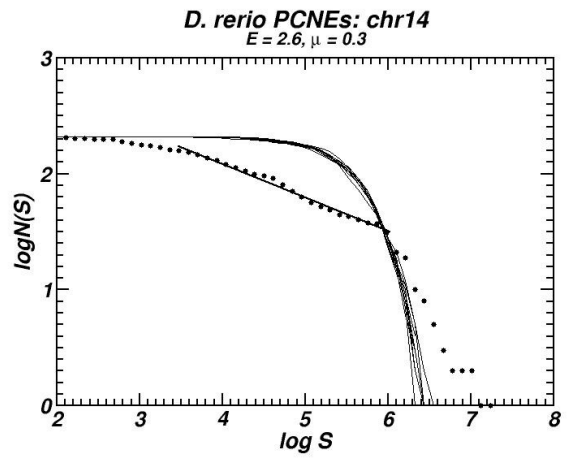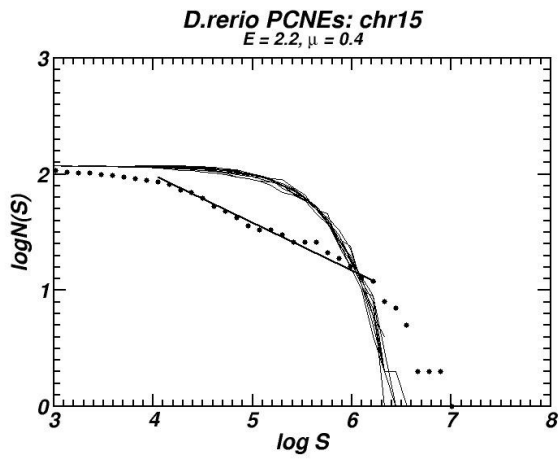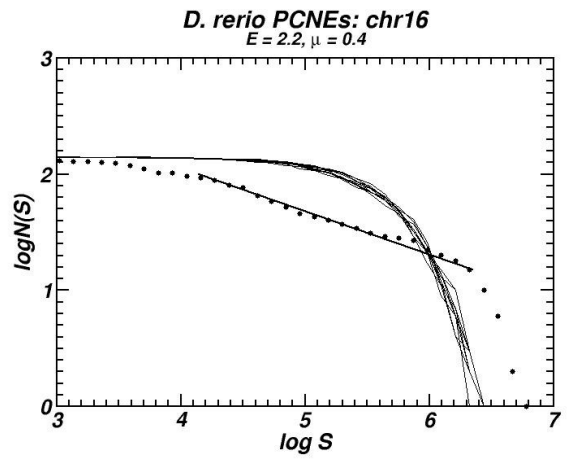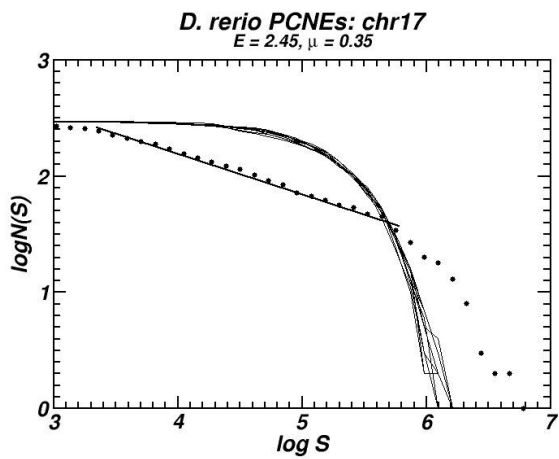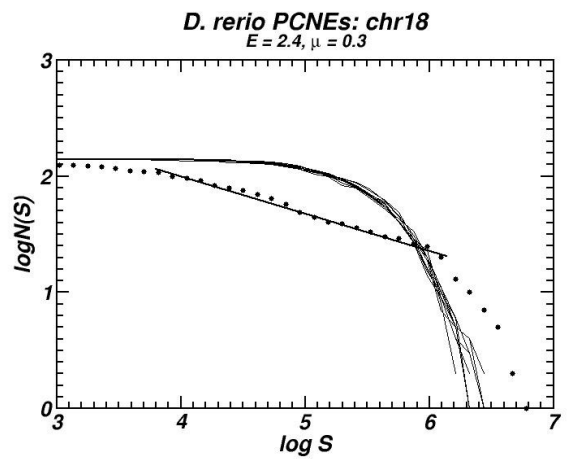

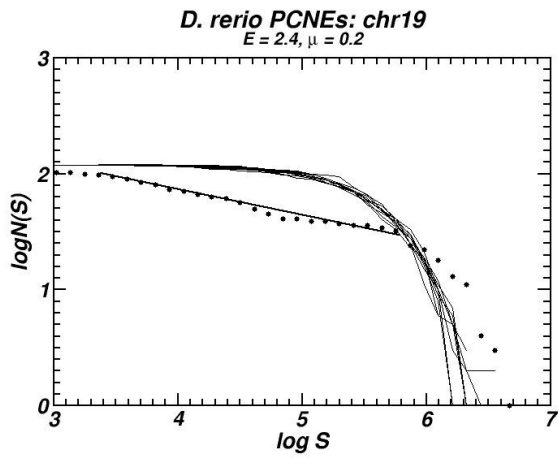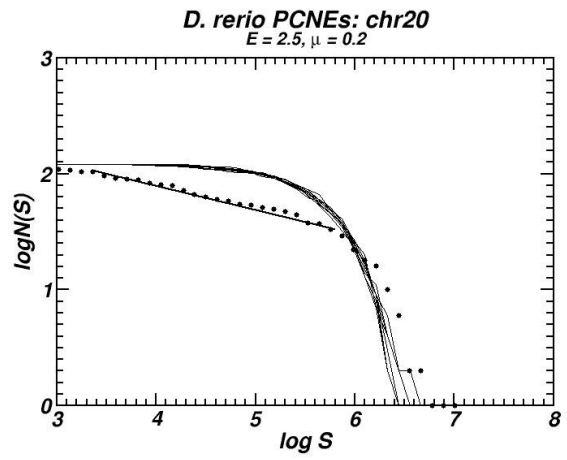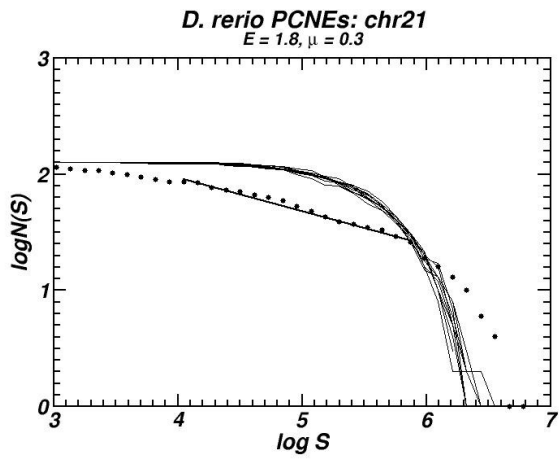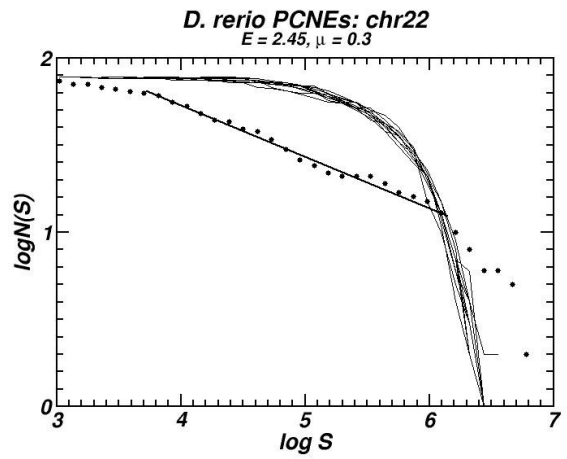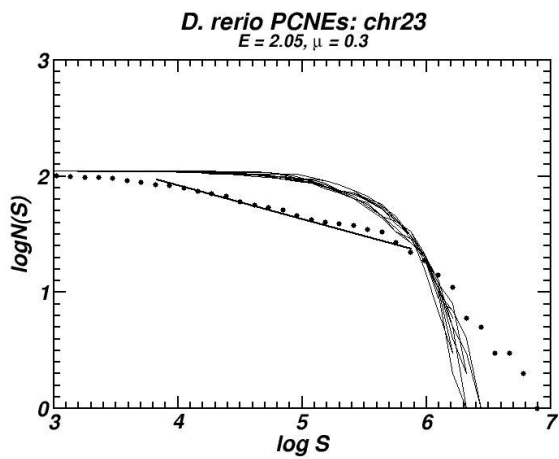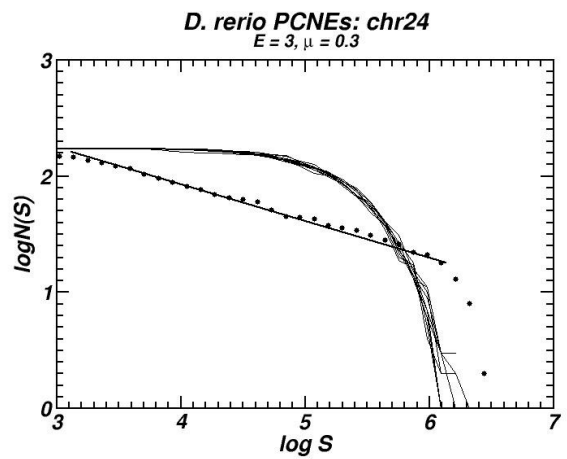

*D. rerio* PCNEs: chr25  
 $E = 3.05, \mu = 0.4$

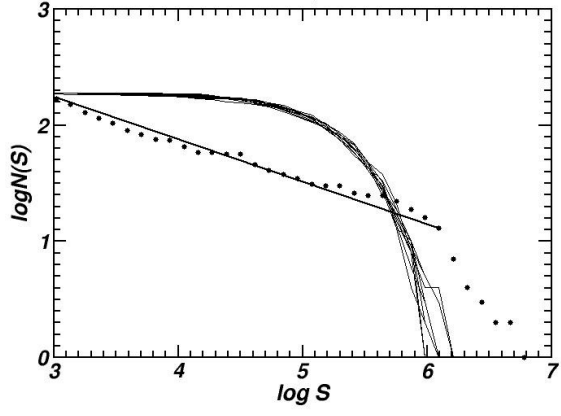

# Human-Rodents CNEs (Dataset x)

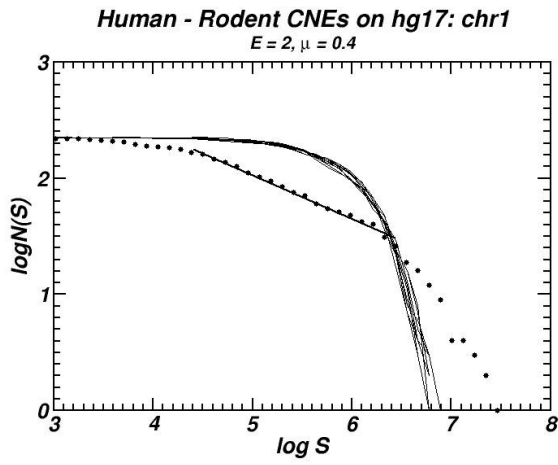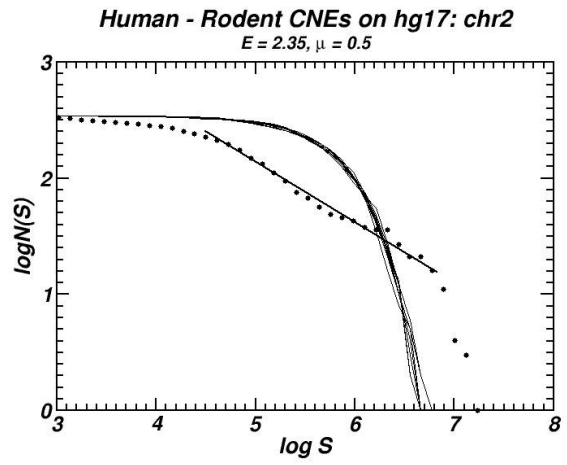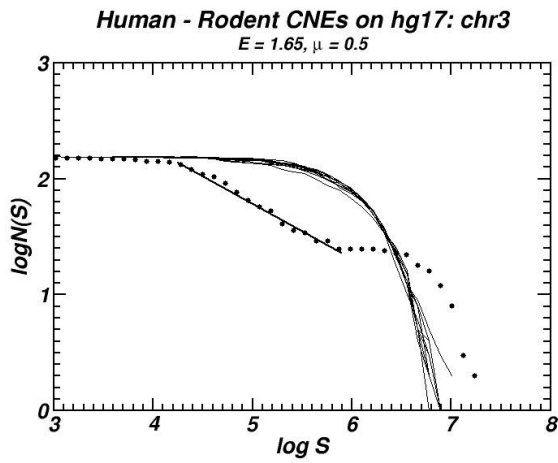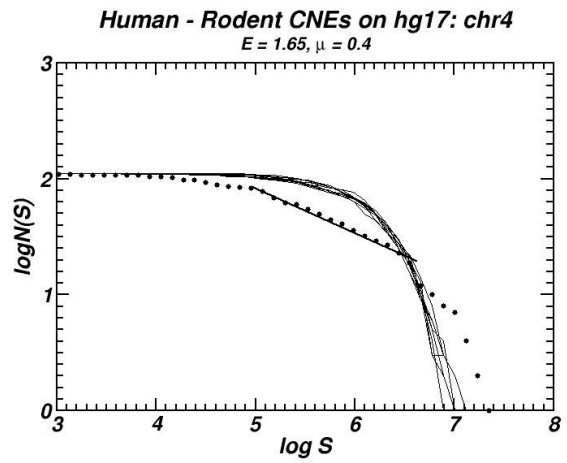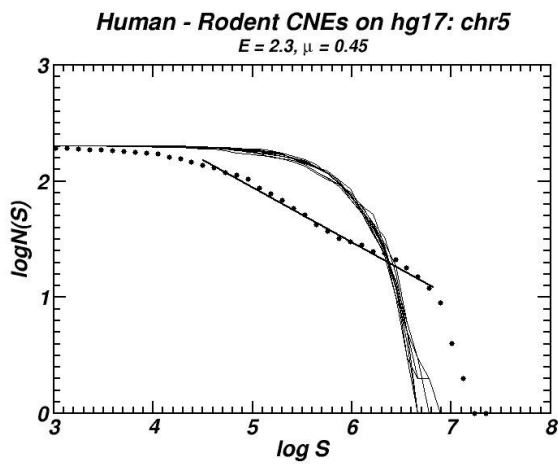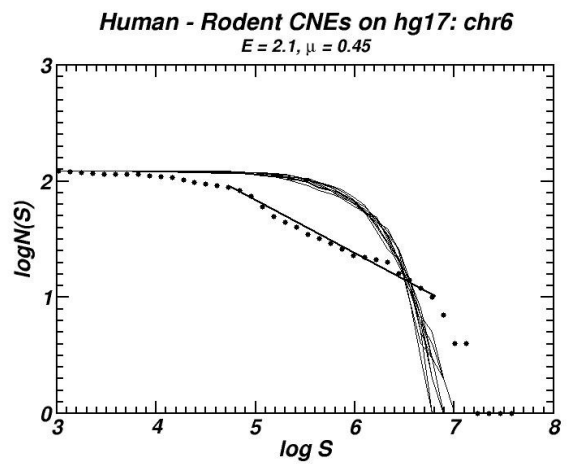

**Human - Rodent CNEs on hg17: chr7**  
 $E = 2.35, \mu = 0.45$

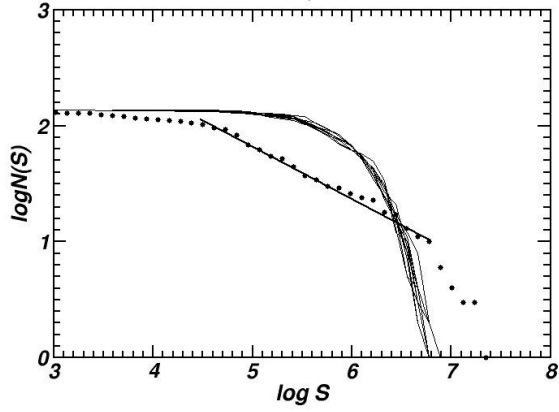

**Human - Rodent CNEs on hg17: chr8**  
 $E = 2.3, \mu = 0.4$

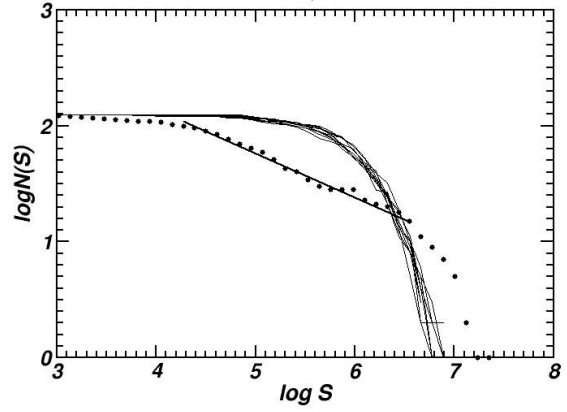

**Human - Rodent CNEs on hg17: chr9**  
 $E = 2.15, \mu = 0.5$

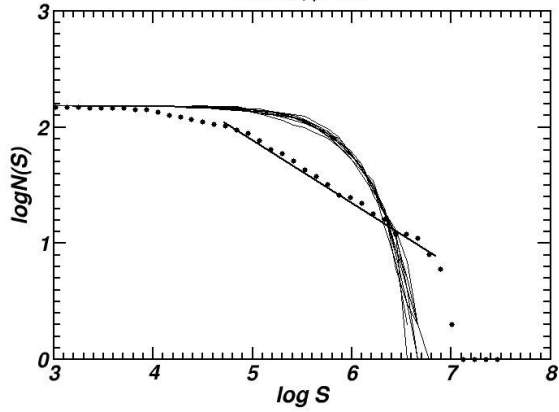

**Human - Rodent CNEs on hg17: chr10**  
 $E = 2.3, \mu = 0.45$

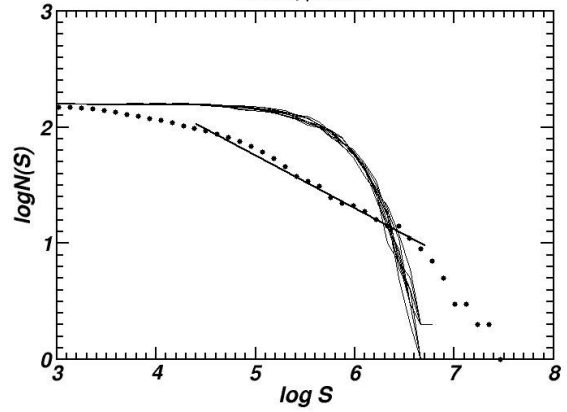

**Human - Rodent CNEs on hg17: chr11**  
 $E = 2.6, \mu = 0.4$

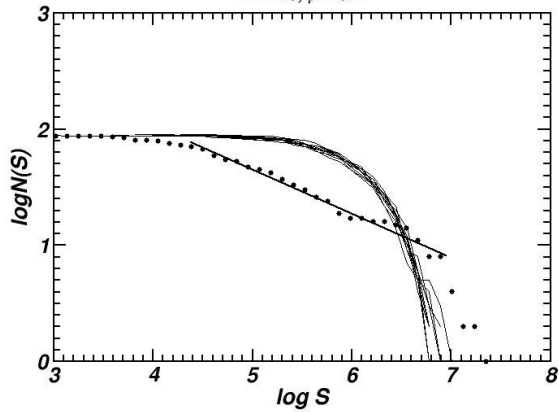

**Human - Rodent CNEs on hg17: chr13**  
 $E = 2.3, \mu = 0.5$

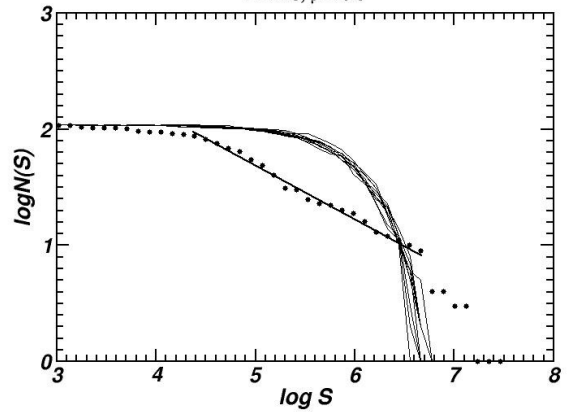

**Human - Rodent CNEs on hg17: chr14**

$E = 2.55, \mu = 0.6$

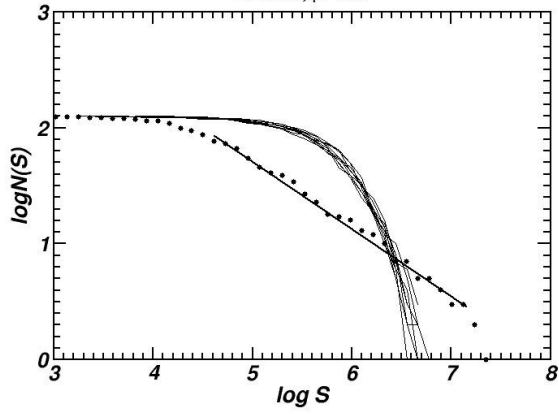

**Human - Rodent CNEs on hg17: chr15**

$E = 2, \mu = 0.5$

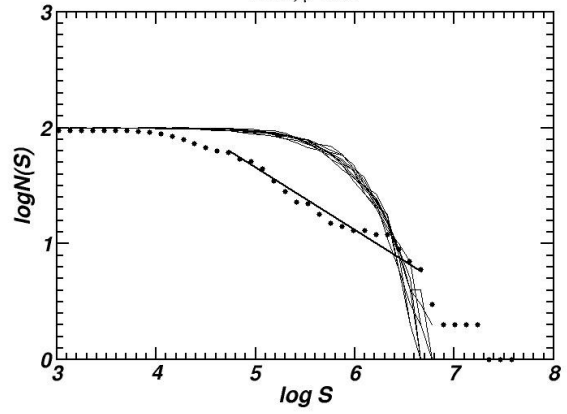

**Human - Rodent CNEs on hg17: chr18**

$E = 2.25, \mu = 0.6$

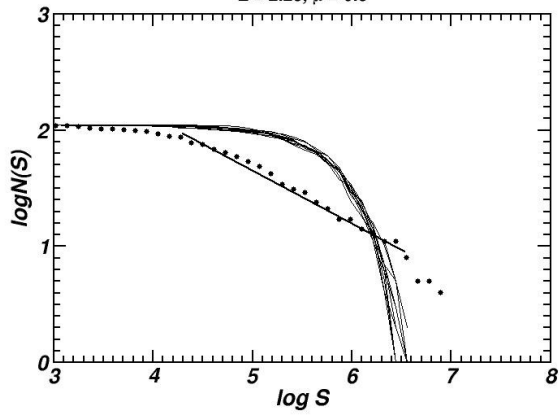

**Human - Rodent CNEs on hg17: chrX**

$E = 1.55, \mu = 0.5$

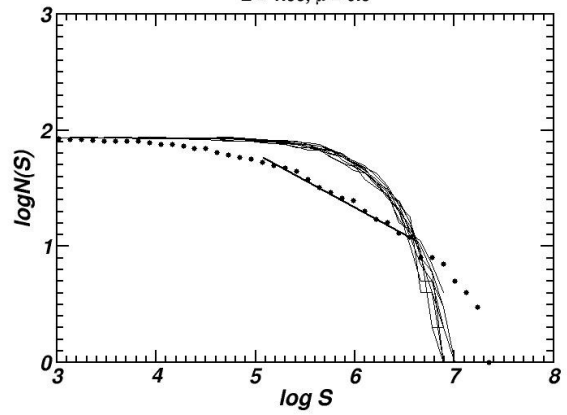

# EU-FR CNEs (Dataset ia)

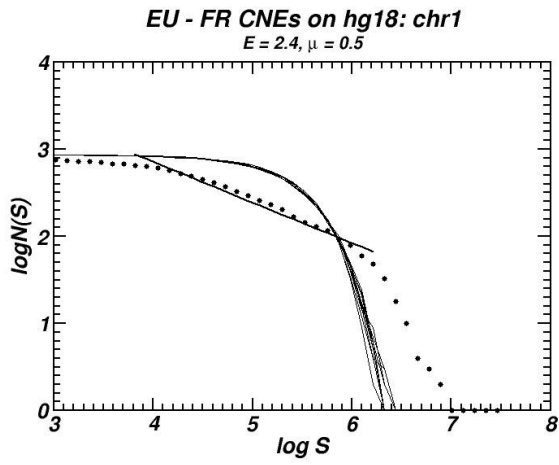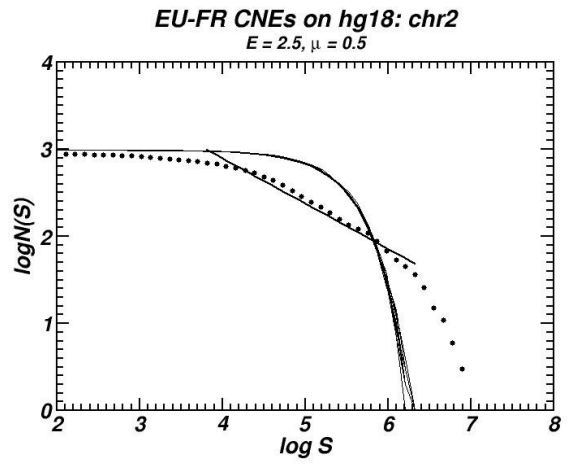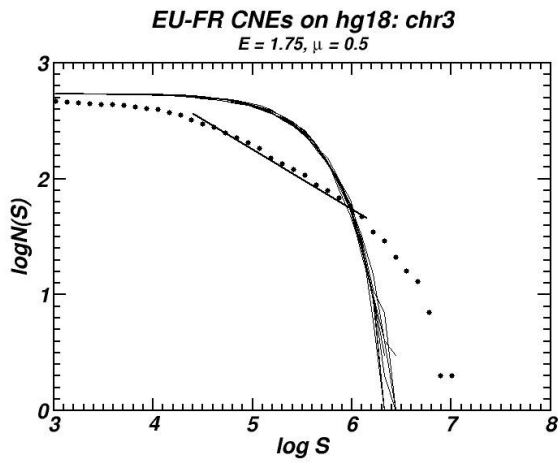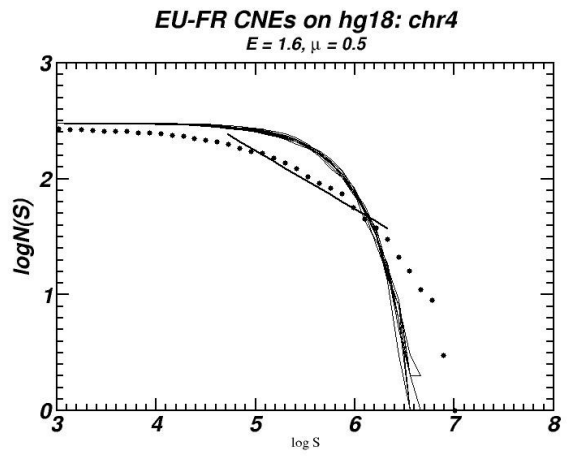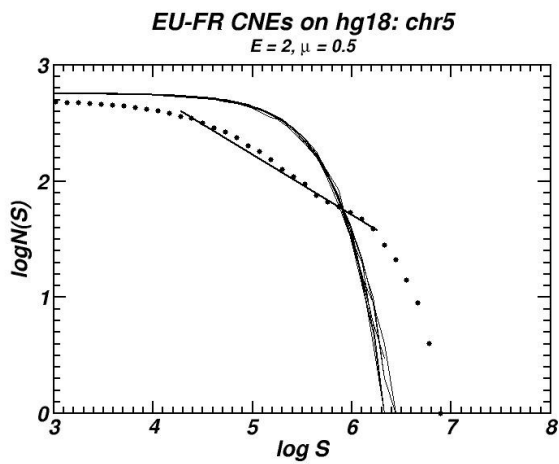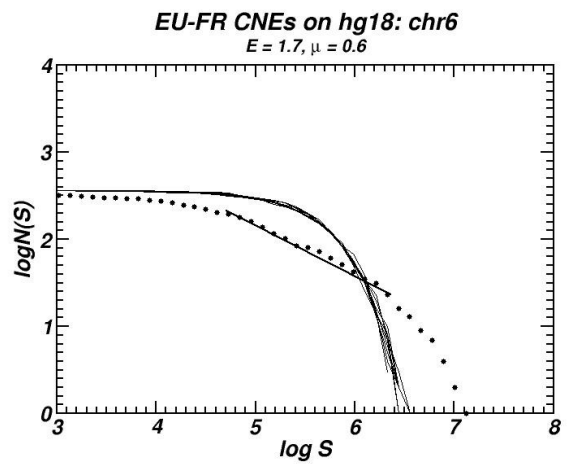



**EU-FR CNEs on hg18: chr7**  
 $E = 1.65, \mu = 0.5$

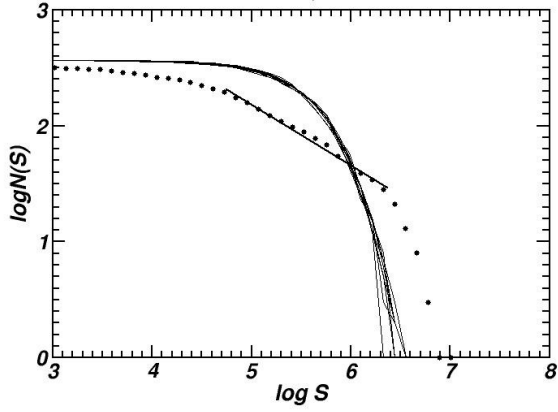

**EU-FR CNEs on hg18: chr8**  
 $E = 1.8, \mu = 0.5$

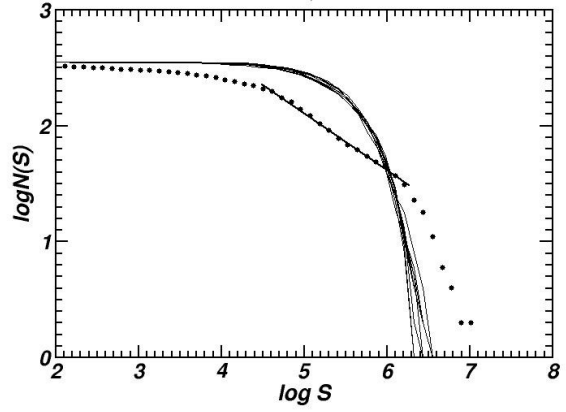

**EU-FR CNEs on hg18: chr9**  
 $E = 1.7, \mu = 0.65$

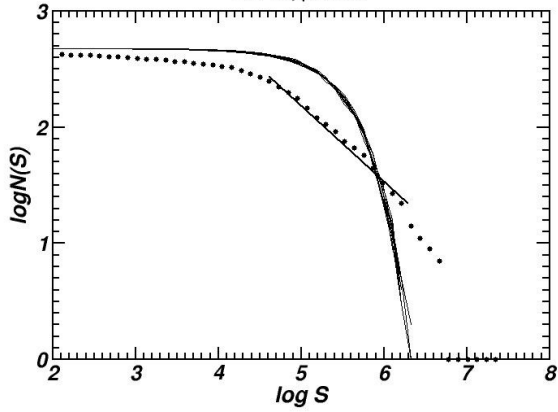

**EU-FR CNEs on hg18: chr10**  
 $E = 2.15, \mu = 0.47$

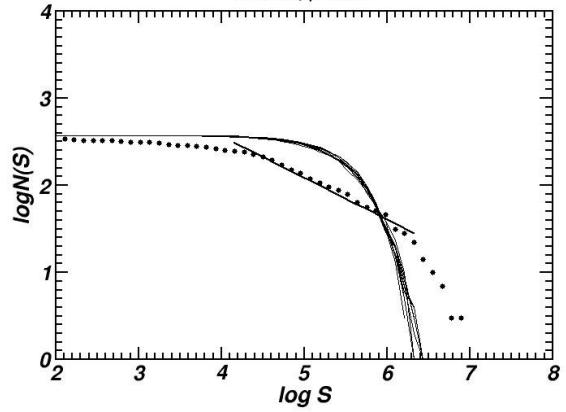

**EU-FR CNEs on hg18: chr11**  
 $E = 2.5, \mu = 0.4$

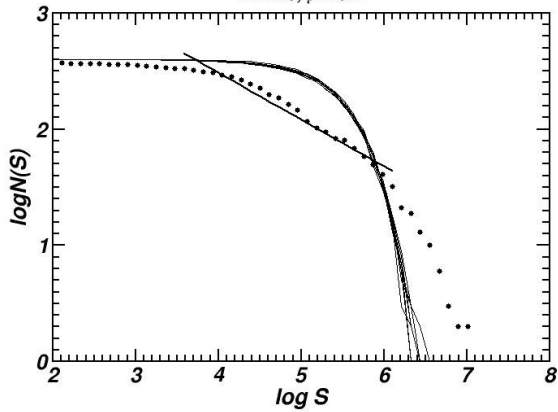

**EU-FR CNEs on hg18: chr12**  
 $E = 1.85, \mu = 0.4$

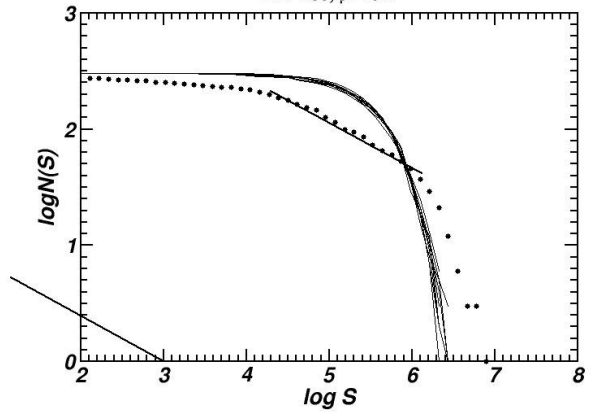

**EU-FR CNEs on hg18: chr13**  
 $E = 2.15, \mu = 0.37$

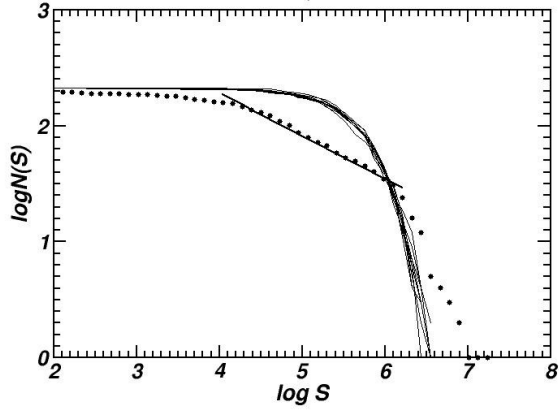

**EU-FR CNEs on hg18: chr14**  
 $E = 1.75, \mu = 0.6$

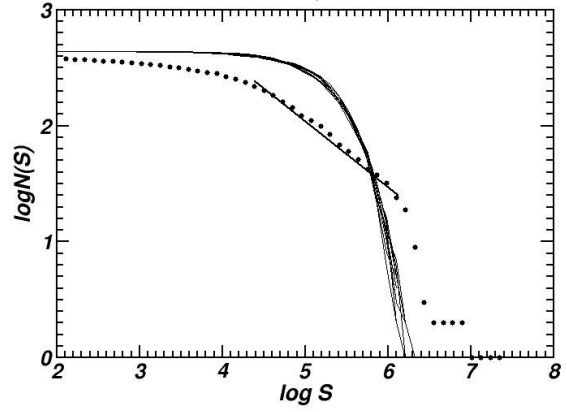

**EU-FR CNEs on hg18: chr15**  
 $E = 1.7, \mu = 0.6$

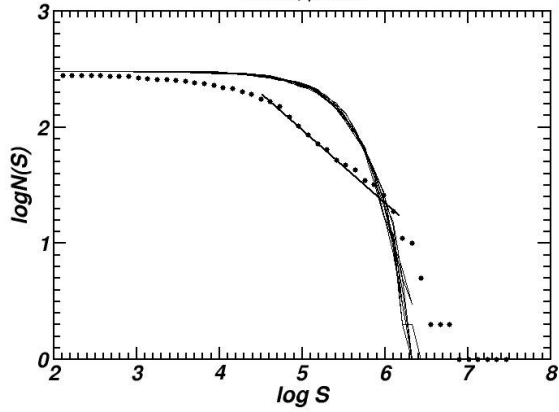

**EU-FR CNEs on hg18: chr16**  
 $E = 1.9, \mu = 0.6$

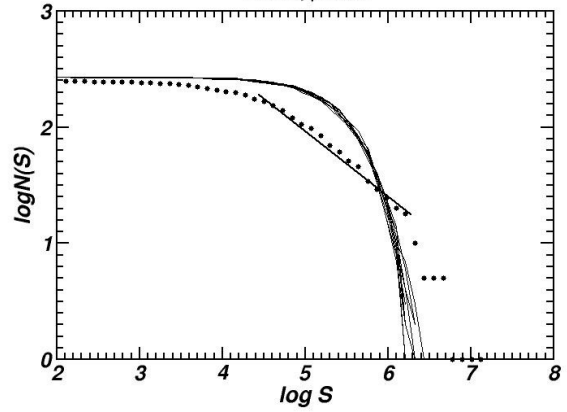

**EU-FR CNEs on hg18: chr17**  
 $E = 1.8, \mu = 0.3$

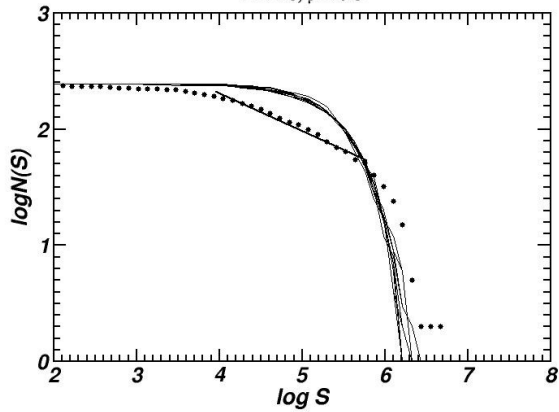

**EU-FR CNEs on hg18: chr18**  
 $E = 2.2, \mu = 0.7$

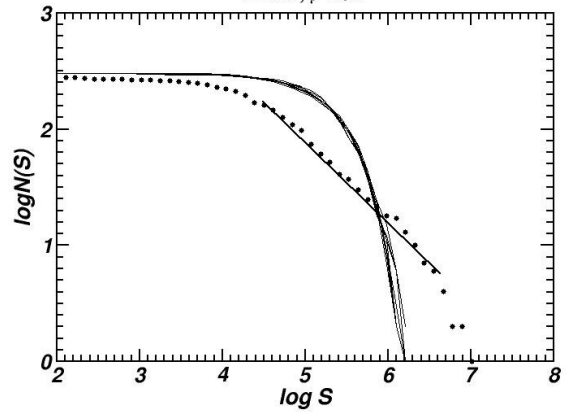

**EU-FR CNEs on hg18: chr19**  
 $E = 2.7, \mu = 0.4$

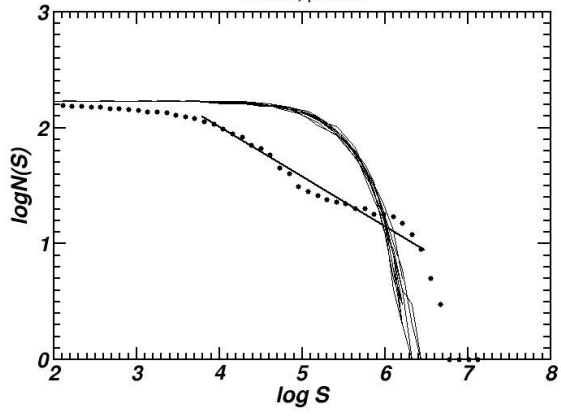

**EU-FR CNEs on hg18: chrX**  
 $E = 1.55, \mu = 0.6$

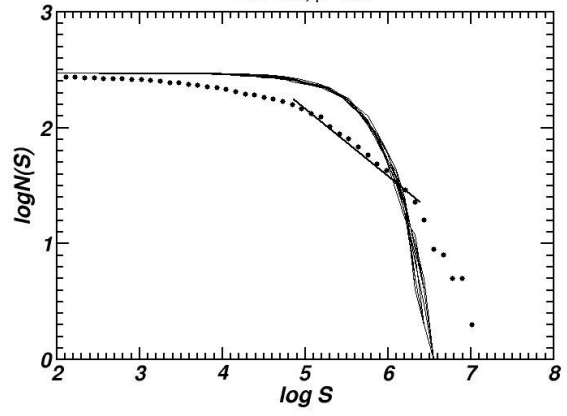

# FR CNEs (Dataset ib)

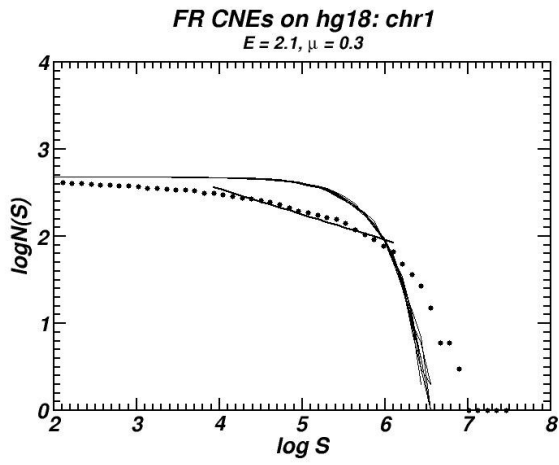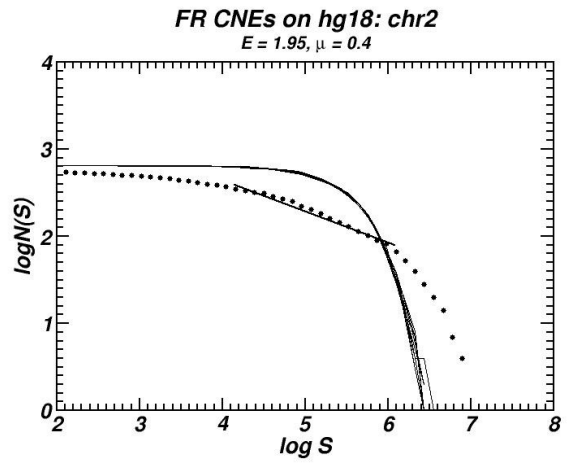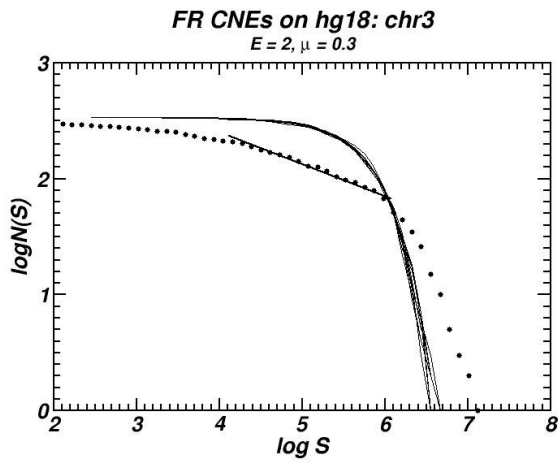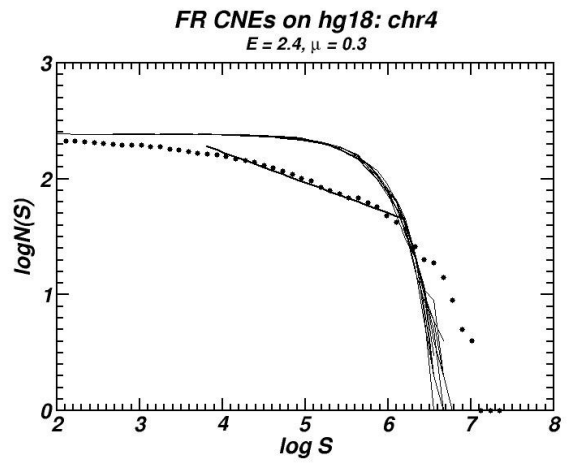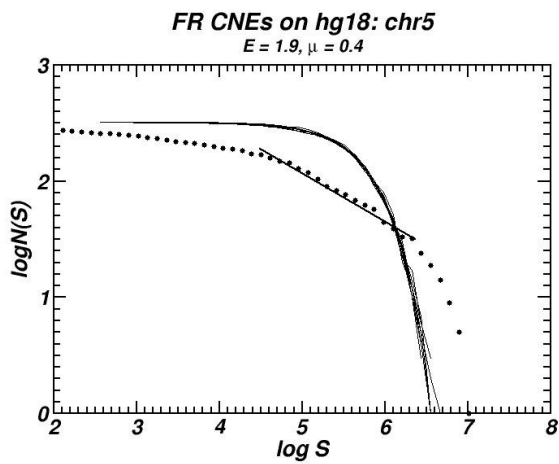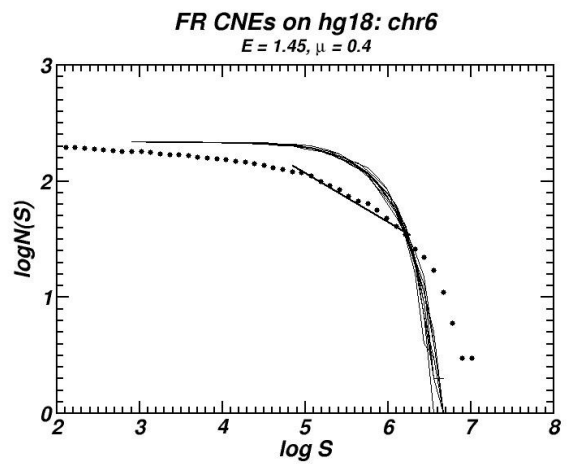

**FR CNEs on hg18: chr7**  
 $E = 2.4, \mu = 0.4$

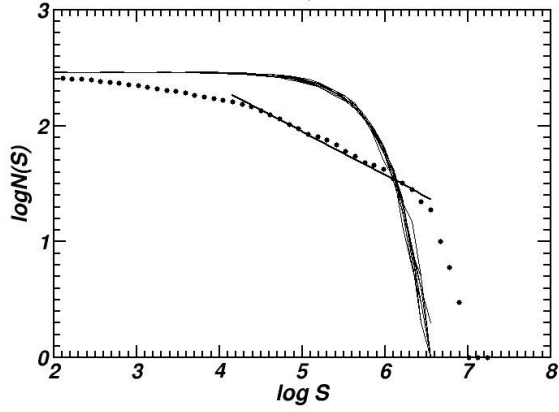

**FR CNEs on hg18: chr8**  
 $E = 2.15, \mu = 0.45$

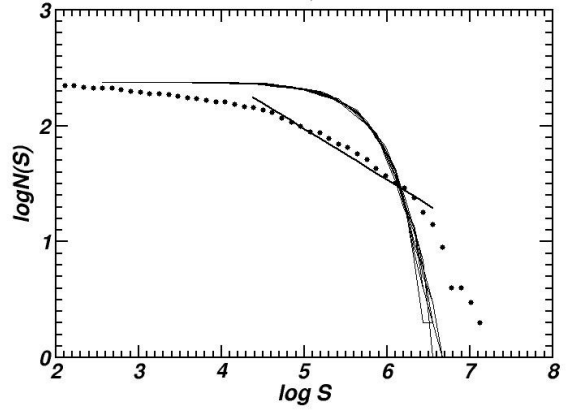

**FR CNEs on hg18: chr9**  
 $E = 2.3, \mu = 0.35$

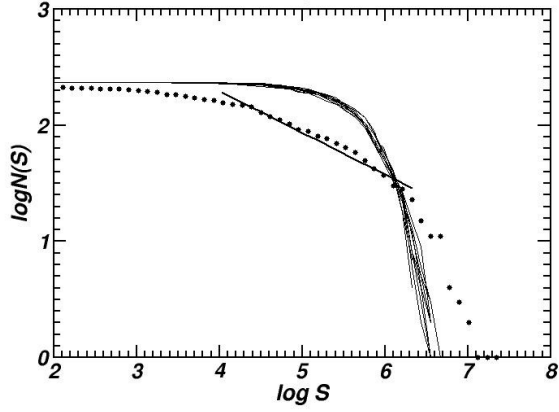

**FR CNEs on hg18: chr10**  
 $E = 3, \mu = 0.32$

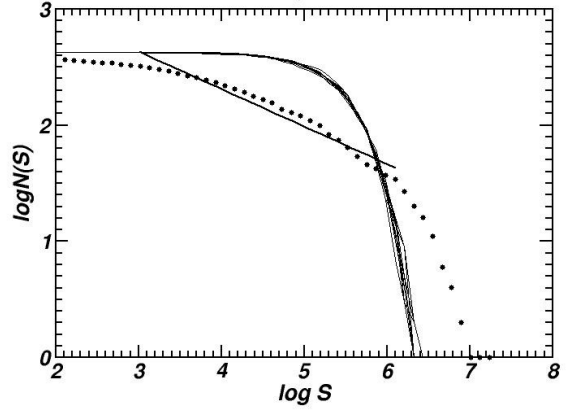

**FR CNEs on hg18: chr11**  
 $E = 2.5, \mu = 0.2$

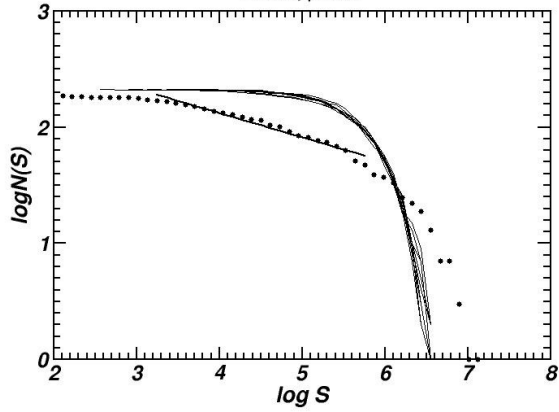

**FR CNEs on hg18: chr12**  
 $E = 2, \mu = 0.2$

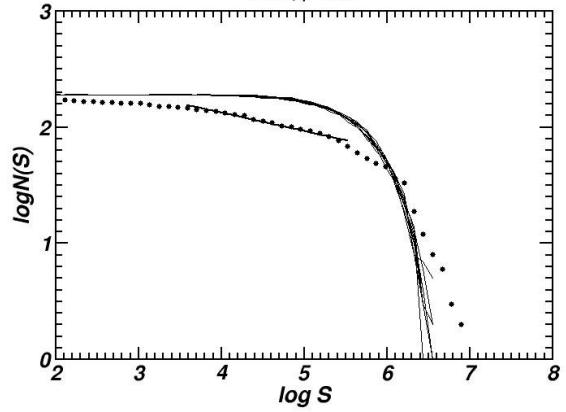

**FR CNEs on hg18: chr13**  
 $E = 2.5, \mu = 0.2$

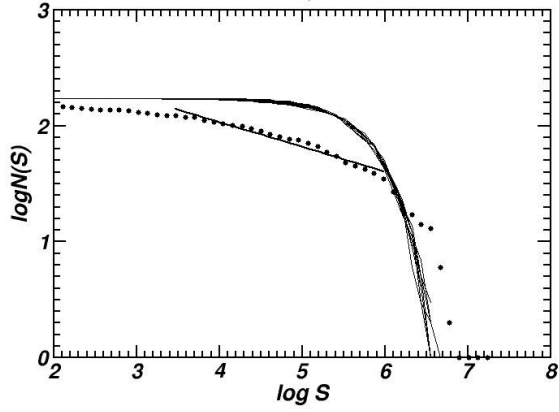

**FR CNEs on hg18: chr14**  
 $E = 1.6, \mu = 0.36$

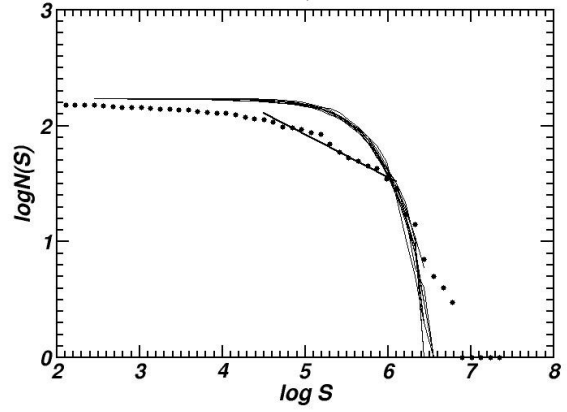

**FR CNEs on hg18: chr15**  
 $E = 1.9, \mu = 0.4$

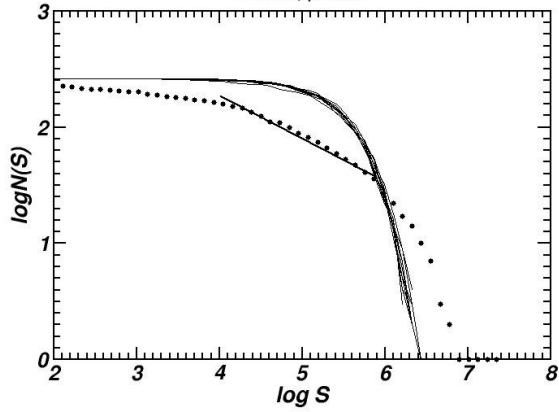

**FR CNEs on hg18: chr16**  
 $E = 1.9, \mu = 0.55$

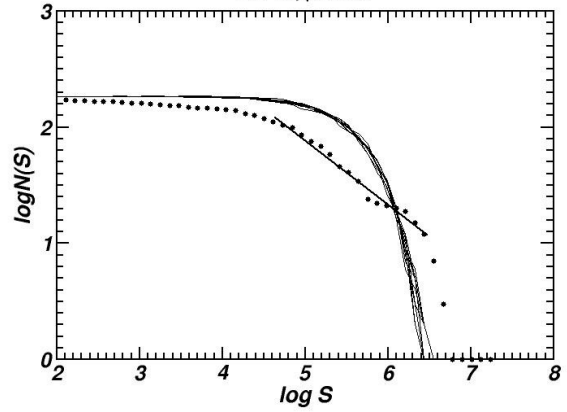

**FR CNEs on hg18: chr17**  
 $E = 2.15, \mu = 0.21$

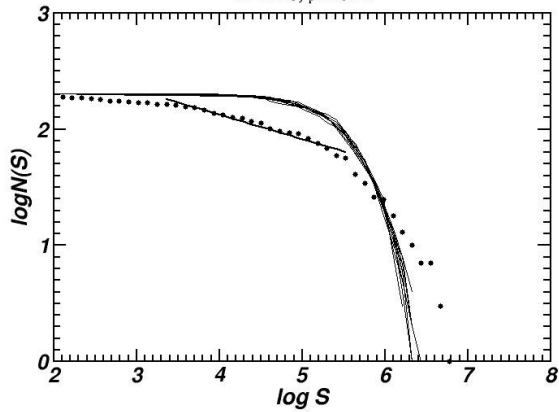

**FR CNEs on hg18: chr18**  
 $E = 3, \mu = 0.28$

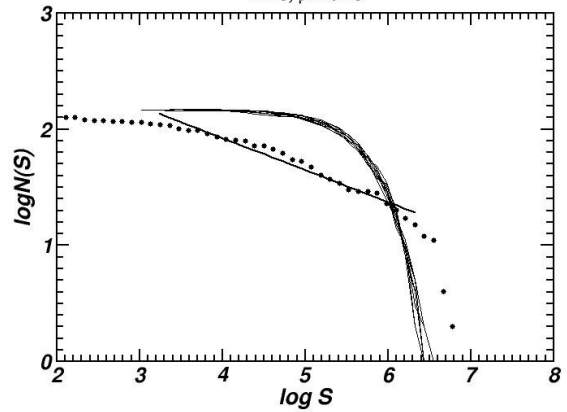

**FR CNEs on hg18: chr19**  
 $E = 2.6, \mu = 0.3$

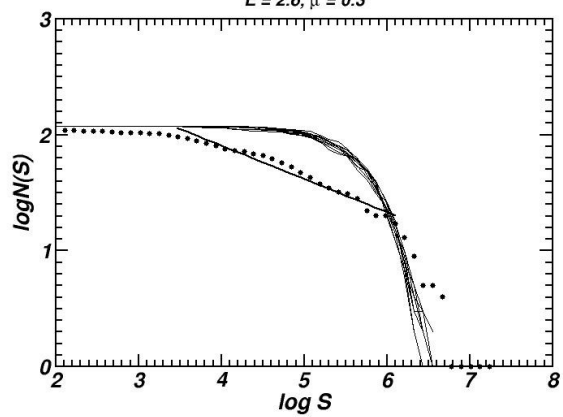

**FR CNEs on hg18: chrX**  
 $E = 2.25, \mu = 0.2$

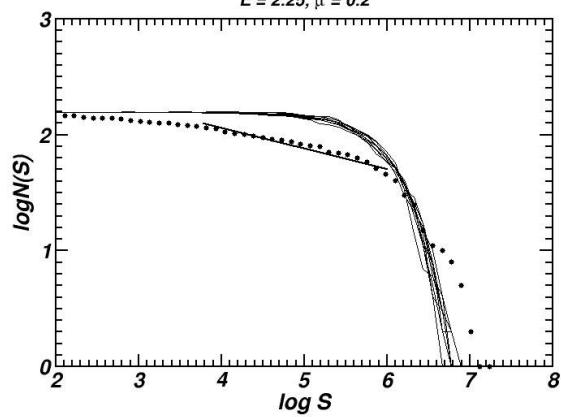

# XT-FR CNEs (Dataset ic)

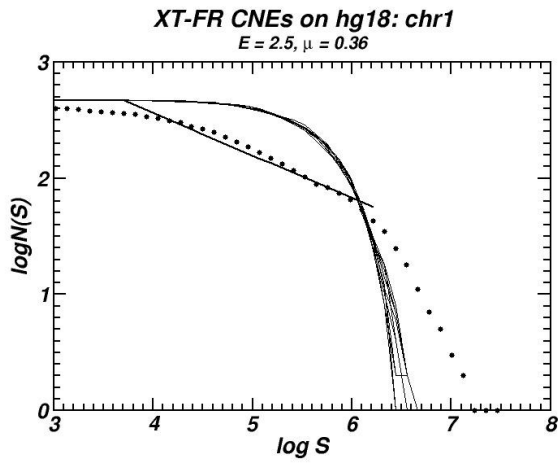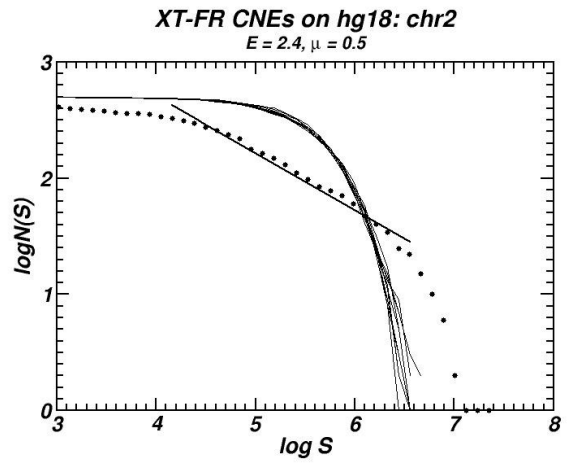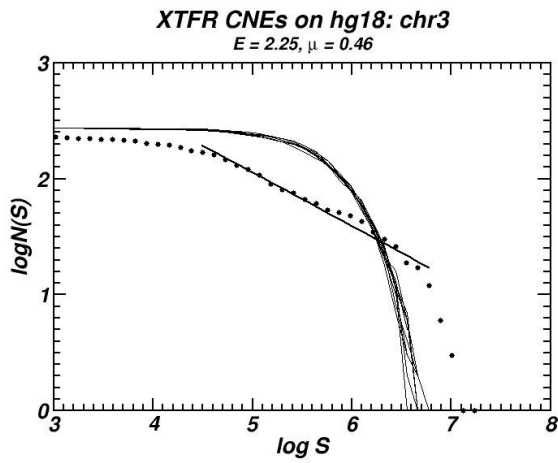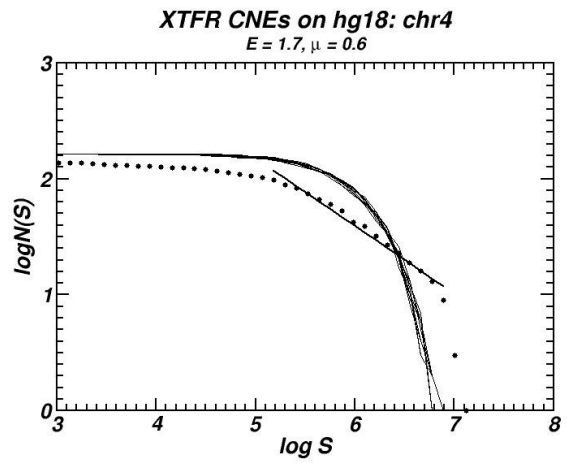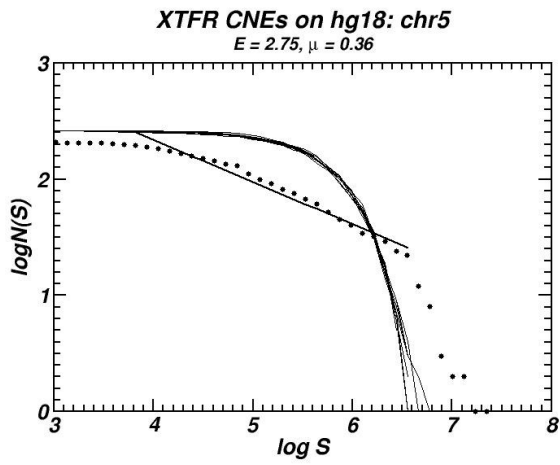



# GG-XT-FR CNEs (Dataset id)

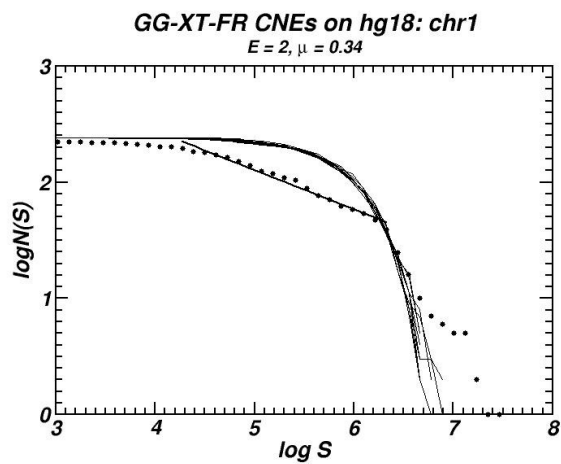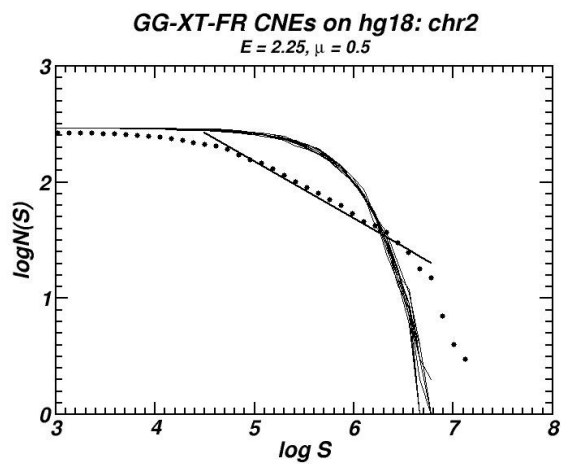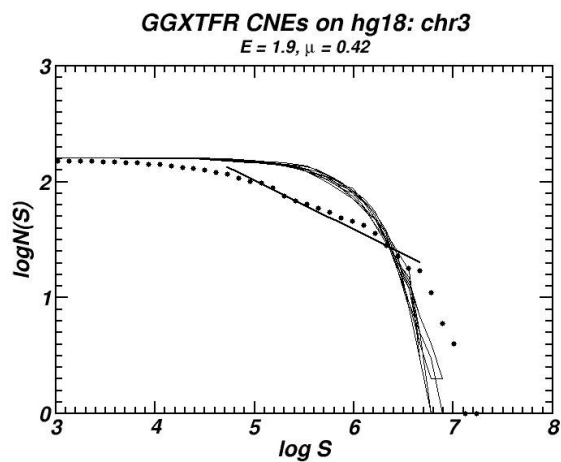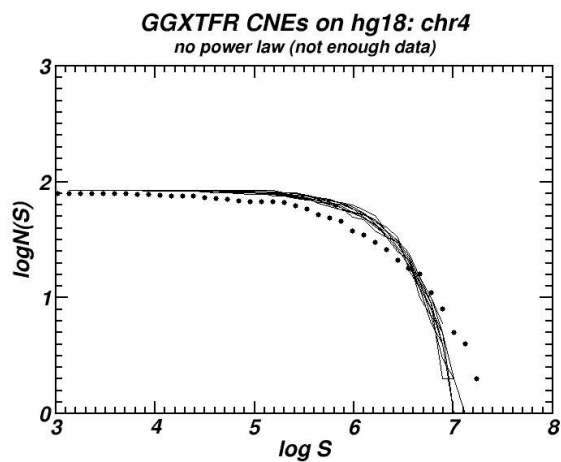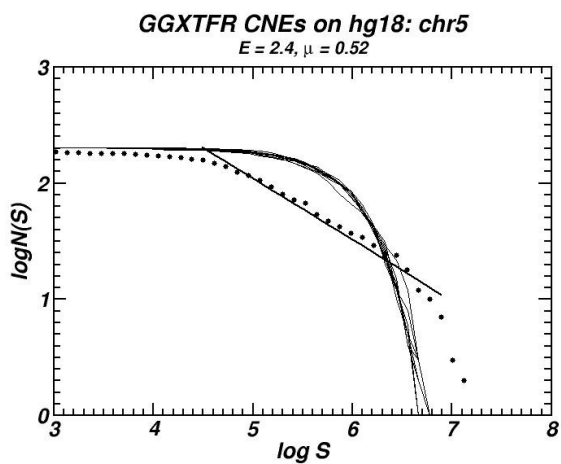

# EU-GG-XT-FR CNEs (Dataset ie)

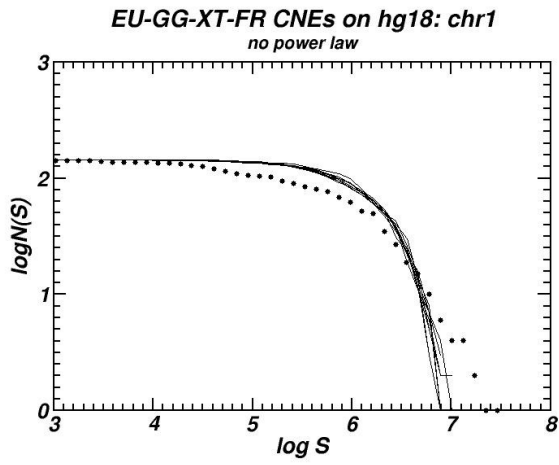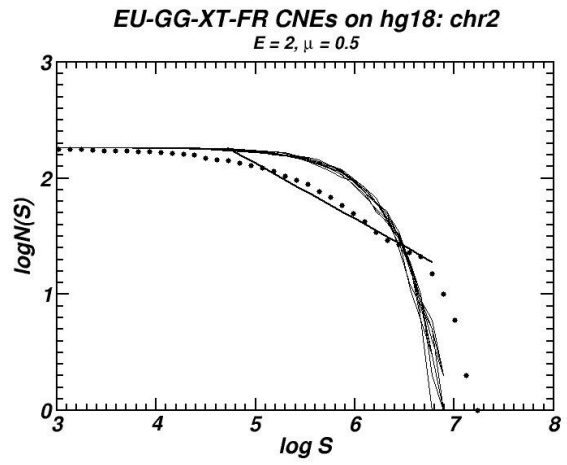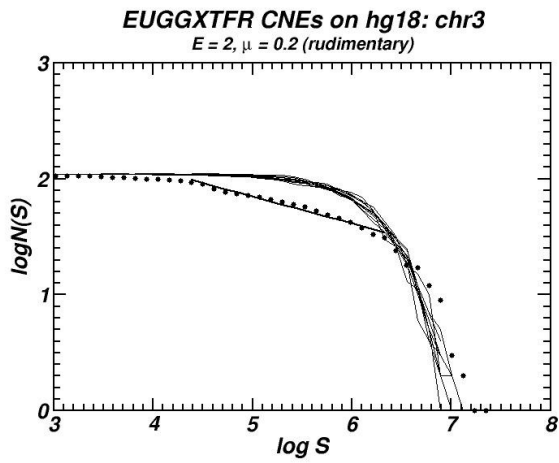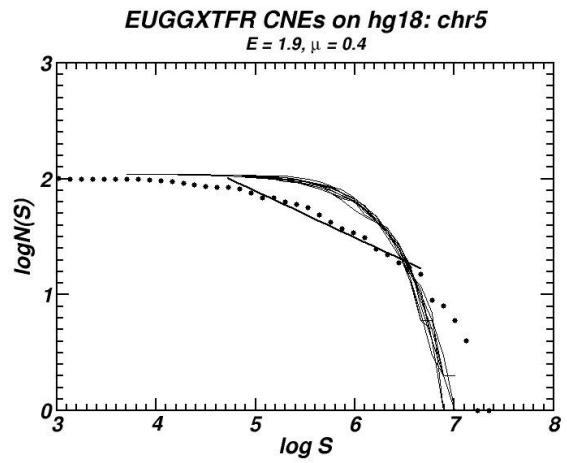

To obtain the figures from the merged and random datasets (adopted from Amniotic and Mammalian datasets as described in the text) shown below, we use the built-in function in R called `sample` (without replacement). Only the first five chromosomes are depicted :

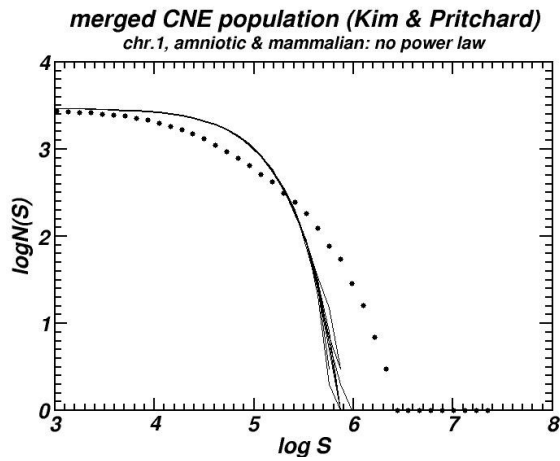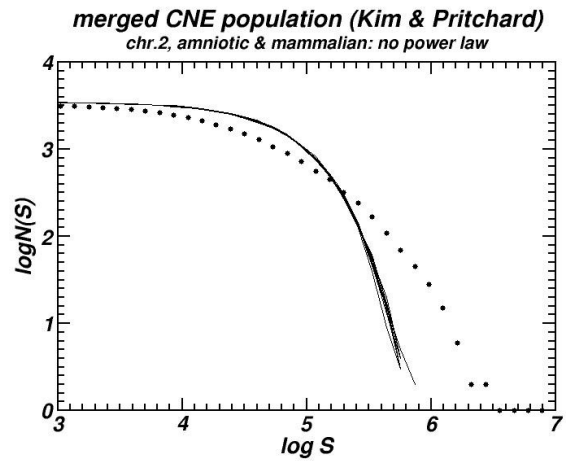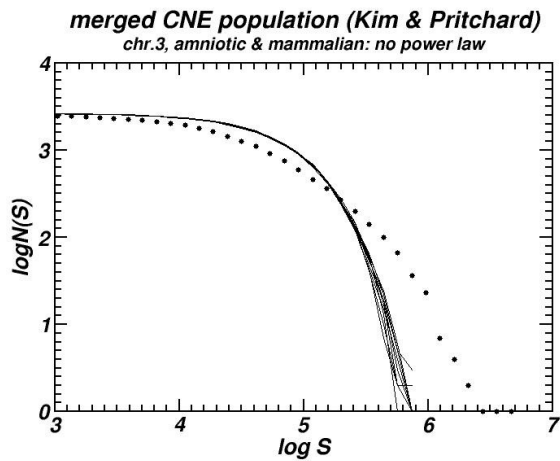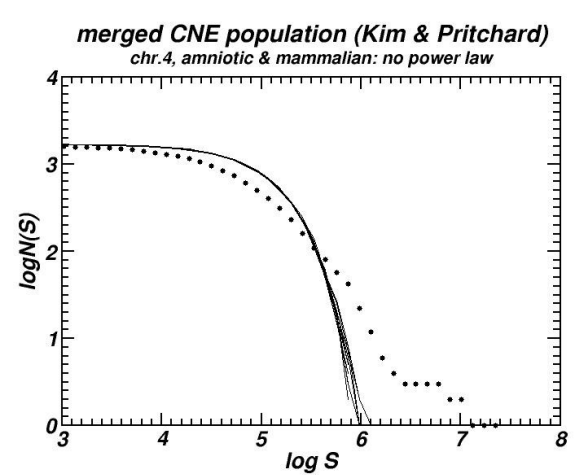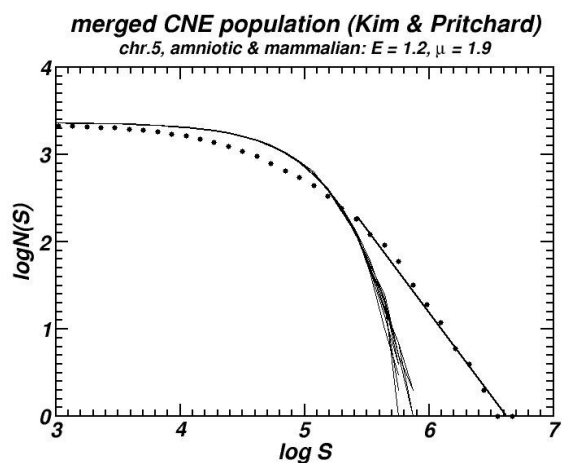

*randomly selected mam. CNEs (Kim & Pritchard)*  
*chr.1, population left eq. to amniotic: no power law*

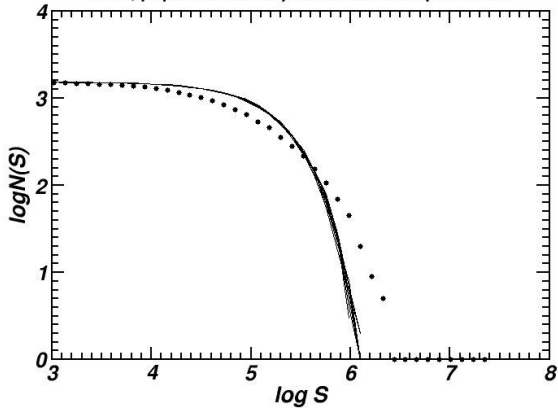

*randomly selected mam. CNEs (Kim & Pritchard)*  
*chr.2, population left eq. to amniotic: no power law*

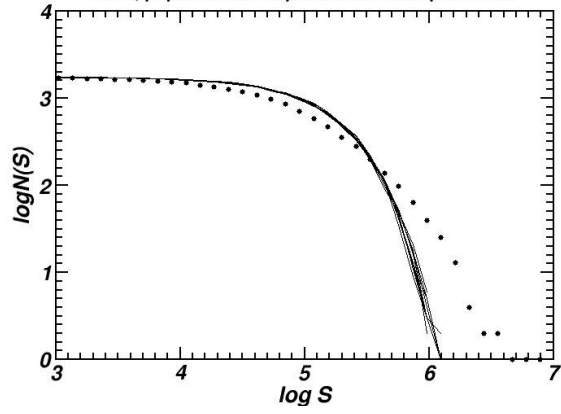

*randomly selected mam. CNEs (Kim & Pritchard)*  
*chr.3, population left eq. to amniotic: no power law*

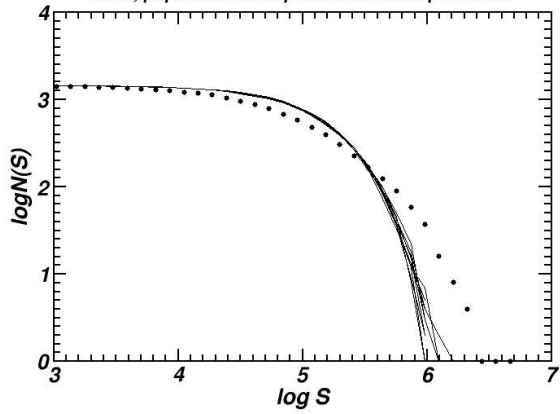

*randomly selected mam. CNEs (Kim & Pritchard)*  
*chr.4, population left eq. to amniotic: no power law*

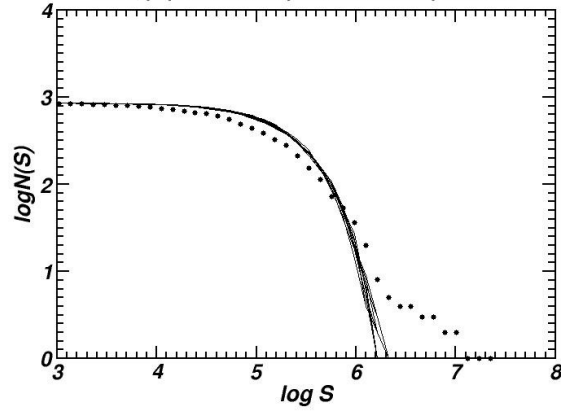

*random mammalian CNEs on hg17: chr5*  
*no power law*

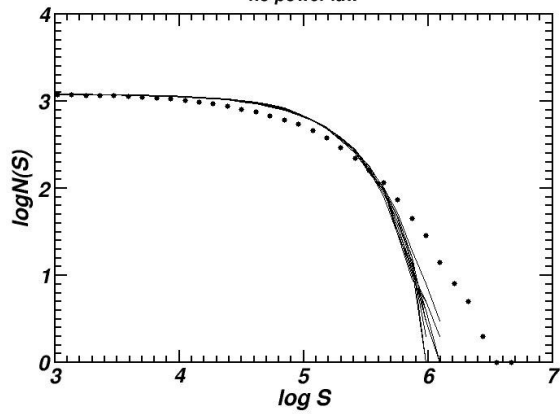

## Appendix

### Additional Simulations using the genomic duplications – CNE loss model

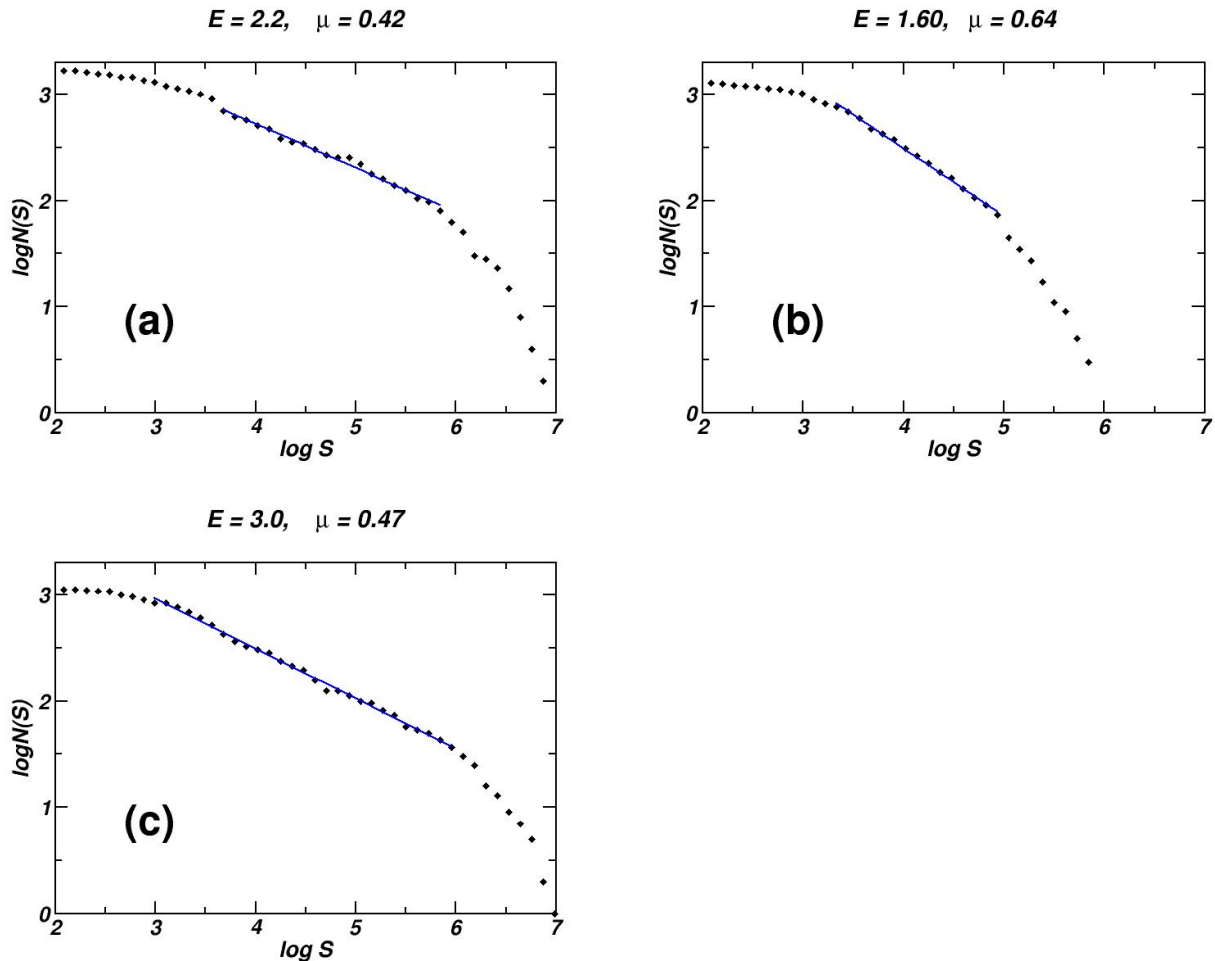

#### Simulations' details

Examples of simulations additional to the ones given in Figure 3 are shown. Initially, 1000 markers (representing CNEs) are randomly inserted in a sequence 2Mnt long. Then, in (a), 173 segmental duplication events occurred, with lengths sampled from a uniform distribution with maximum the 5% of the actual length of the simulated sequence. After each such event a number of CNEs equal to 90% of the number of the duplicated ones are eliminated. The length reached by the simulated chromosome was ~195 Mnt (steps *i* and *ii* of the model). In (b) the segmental duplications were 87 (~50% less) and the final sequence length ~22 Mnt. In (c) the number of segmental duplications is as in (a) and the finally reached length ~119Mnt. Here, 256 additional events of non-duplicated CNEs eliminations are also allowed (step *iii* of the model). These eliminations represent cases of loss of function of ancestral CNEs with a subsequent progressive decomposition. For genomic and for model-generated size distributions, circles and rhombs are used respectively, throughout.
